# Supplementary material for: Precise Control of Gold Nanoparticles on DNA Origami for Logic Operation
Source: Hindawi journal article supplement (doi:10.1155/2019/4890326), 2019-11-03
Supplement: f1 [file 4890326.f1.doc]

**SUPPLEMENTARY MATERIALS**

Precise control of gold nanoparticles on DNA origami for logic operation

Kuiting Chen 1,2 , Xiang Li 1 and Jing Yang 1,*

1 School of Control and Computer Engineering, North China Electric Power University, 102200, China.
2 School of Artificial Intelligence and Automation, Huazhong University of Science and Technology, 430074, China.

***** Correspondence: yjzcdd_2000@ncepu.edu.cn

**This file includes:**

Figs. S1. The detailed sequences of connections between DNA origami and AnNPs;

Figs. S2 to S5. The gel images of the concentration gradients of trigger strand;

Figs. S6. Scaffold / staple layout of the two-layer rod origami (TL);

Figs. S7. TEM image of TL;

Figs. S8 to S11. Representational TEM images of various OUTPUT structures;

Tables S1. The statistical results of TEM images;

Tables S2. The sequences of TL’s staples;

Tables S3. Other DNA sequences used in this work;

Tables S4. Thermal annealing ramp for TL;

Tables S5. Fitting parameters for the statistical histograms of various OUTPUT structures.

Reference


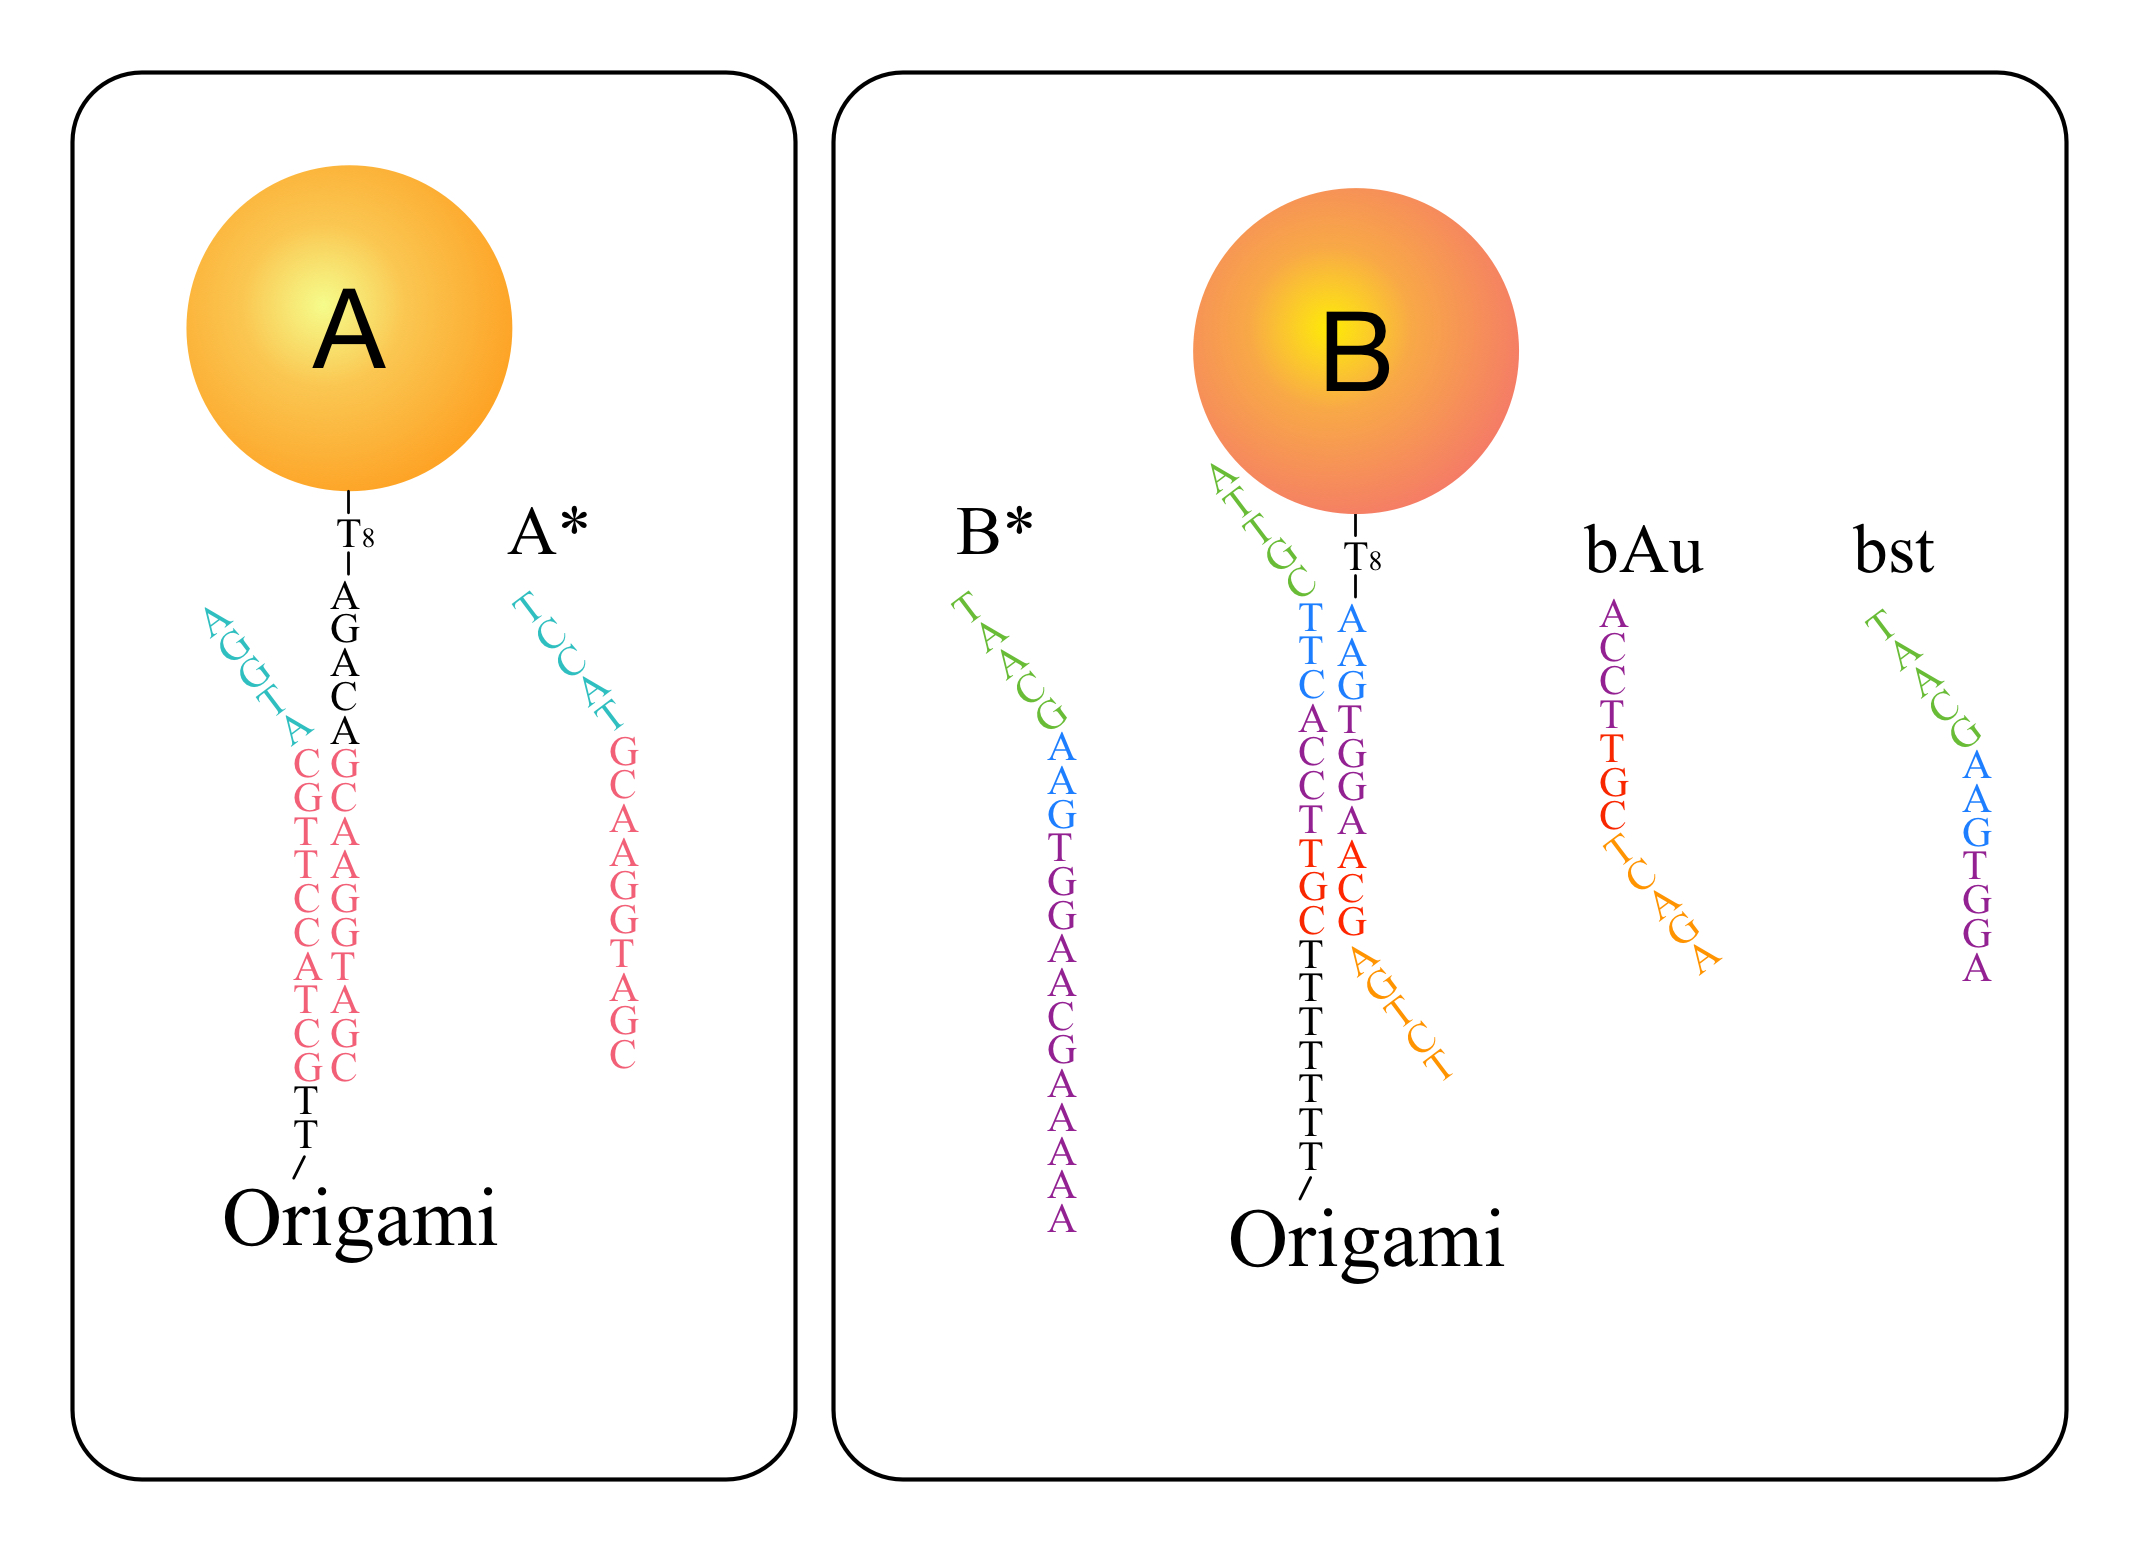


**Figure S1.** The detailed sequences of connections between DNA origami and AnNPs.


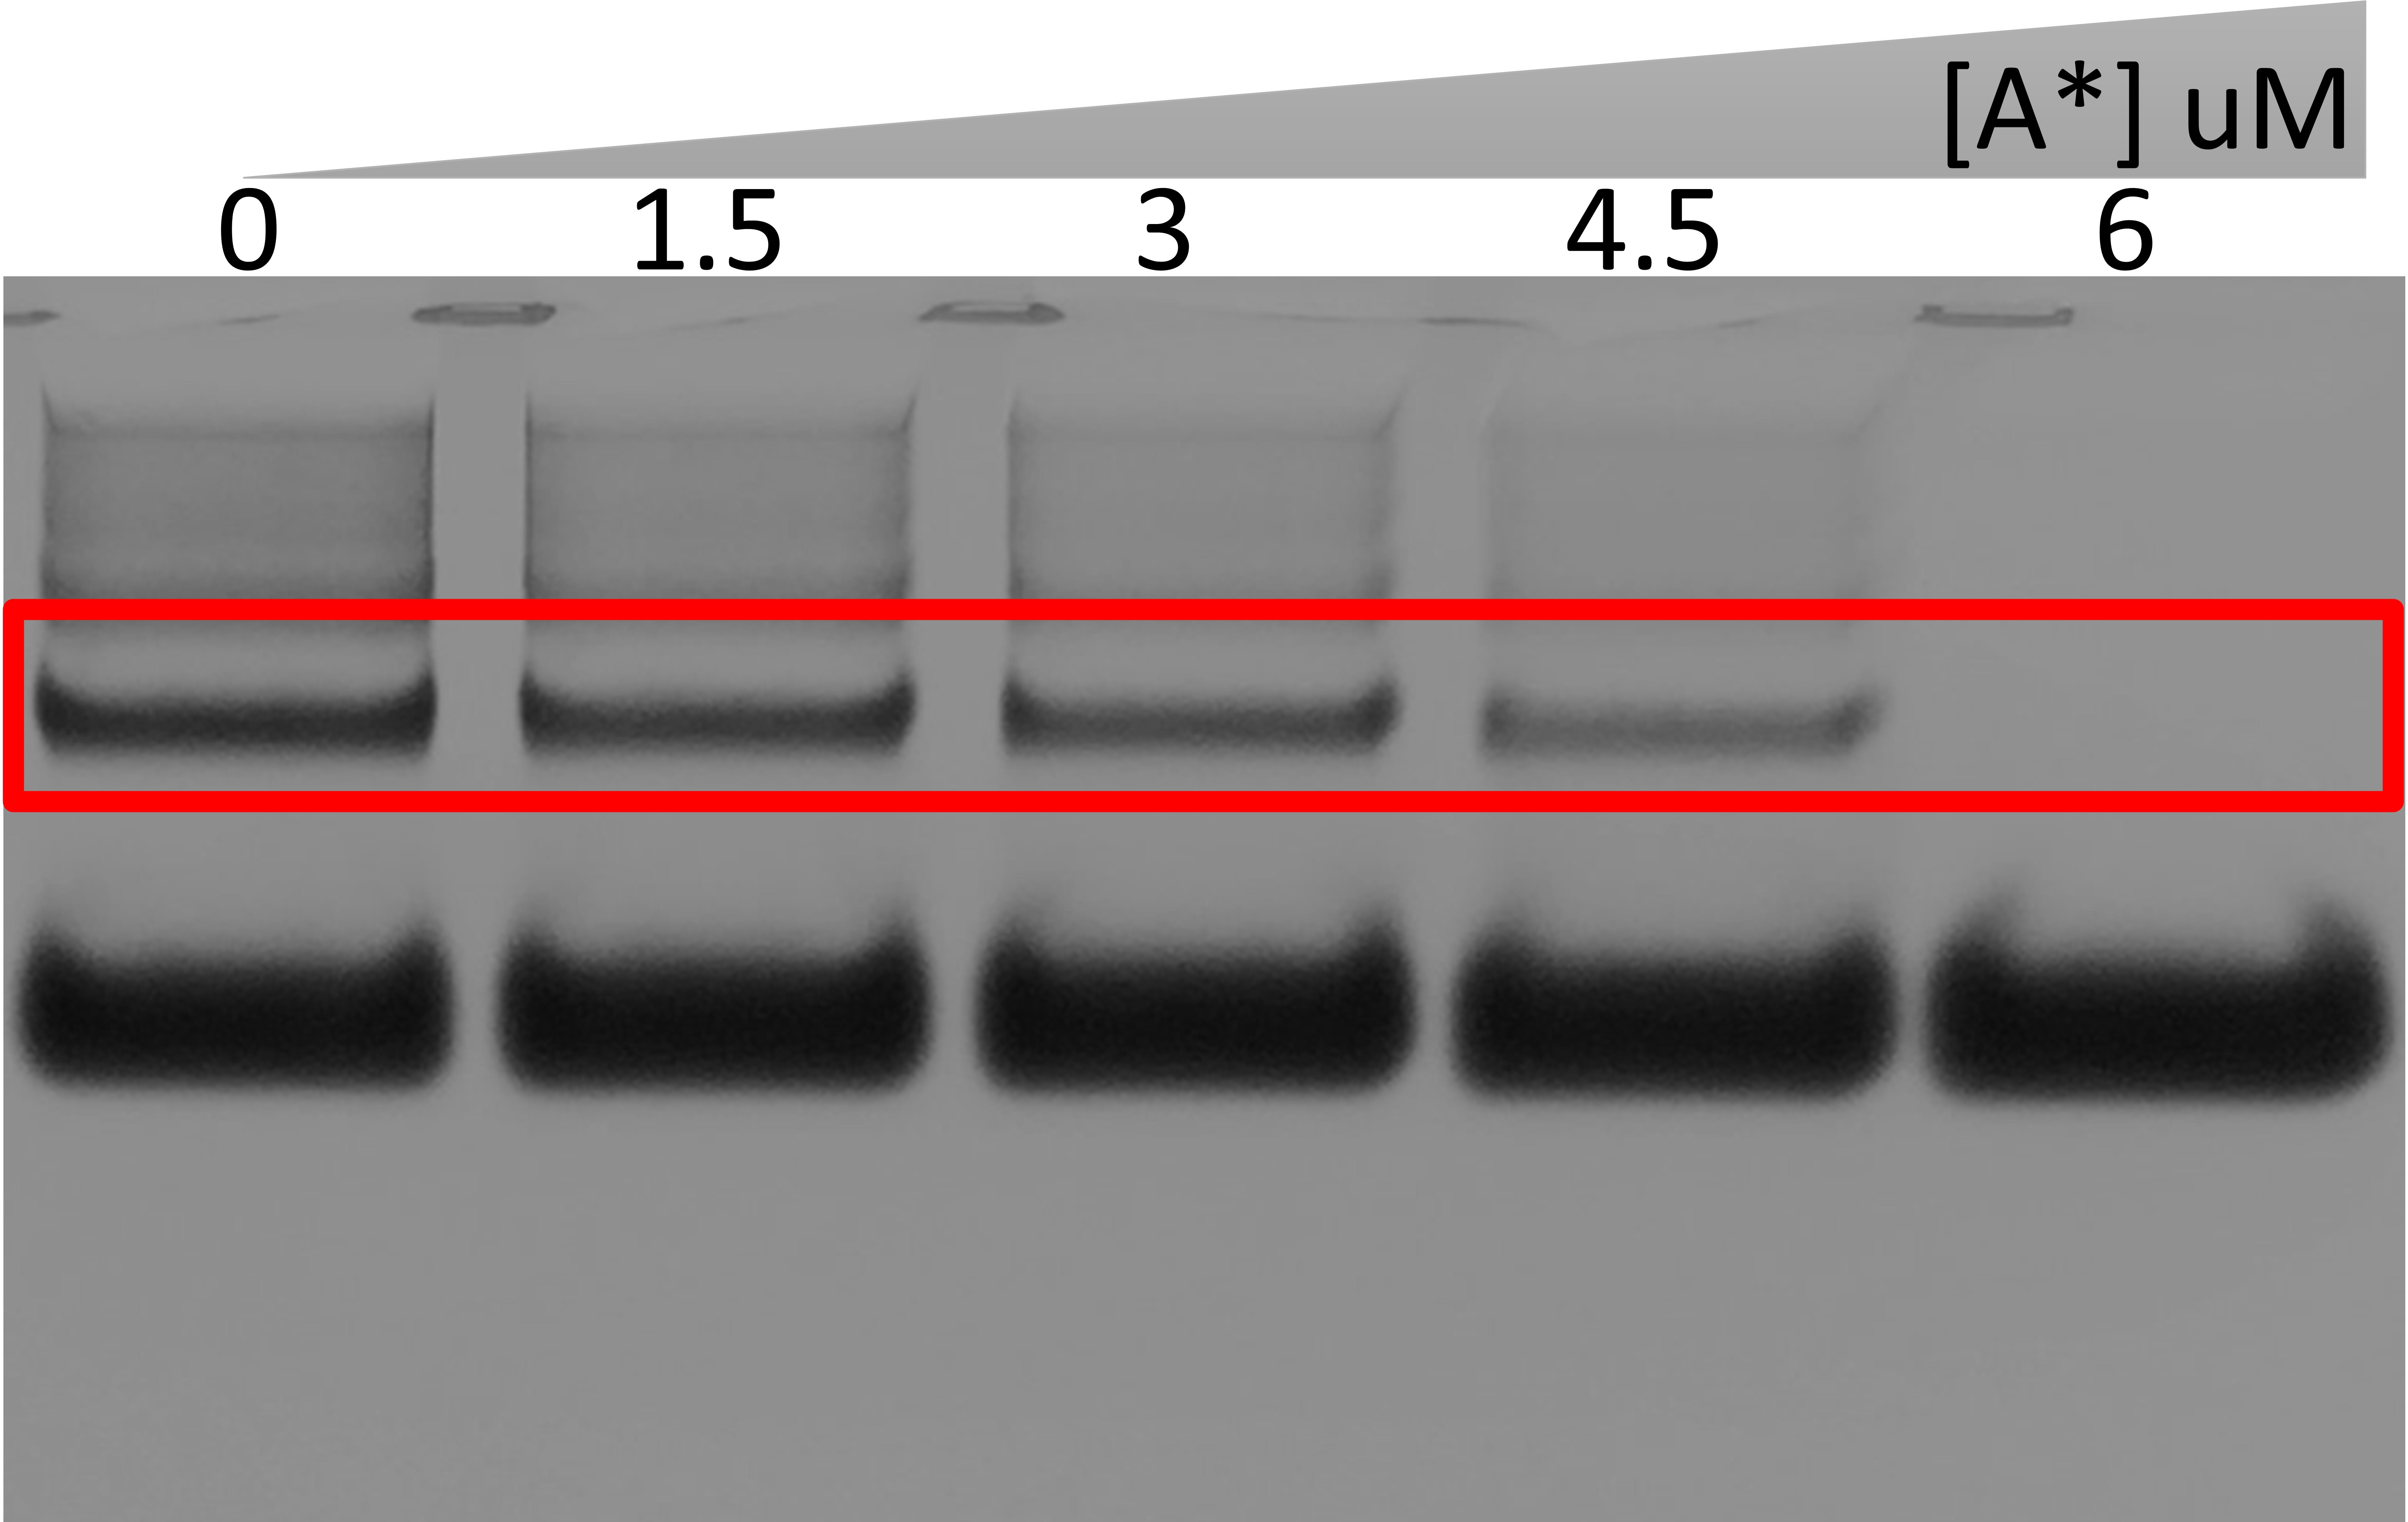


**Figure S2.** The gel image of the concentration gradients of trigger strand A*.


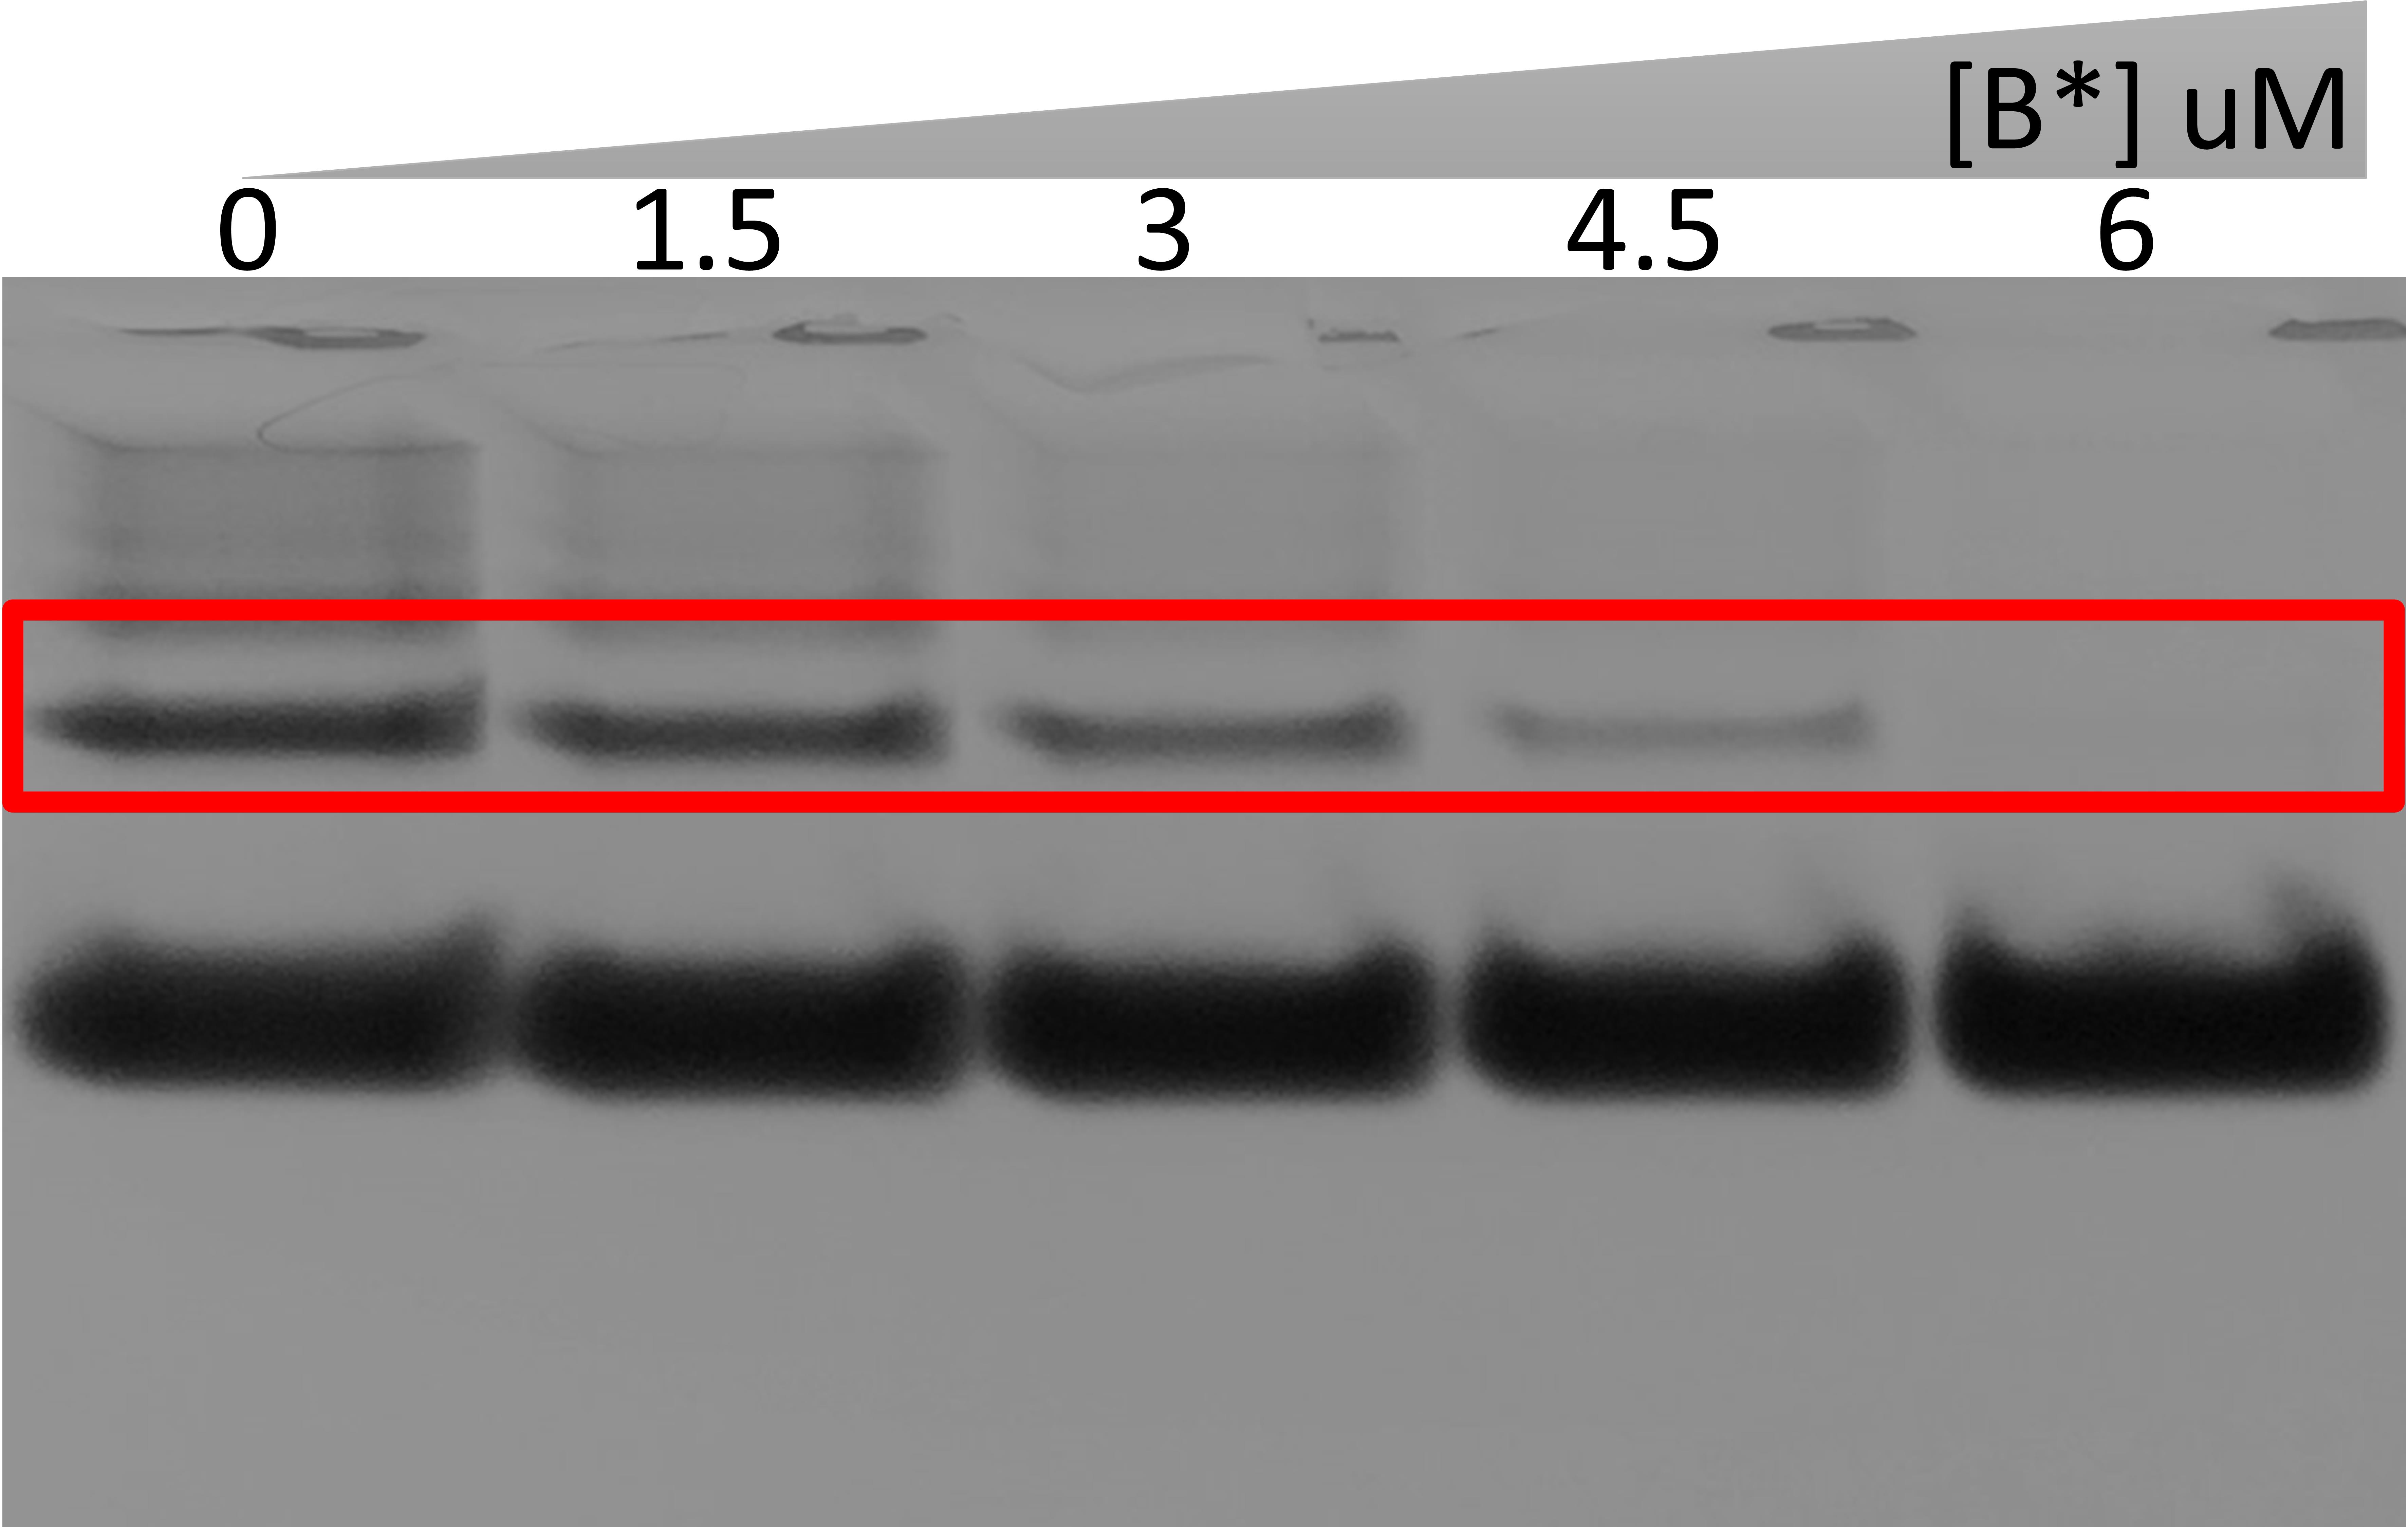


**Figure S3.** The gel image of the concentration gradients of trigger strand B*.


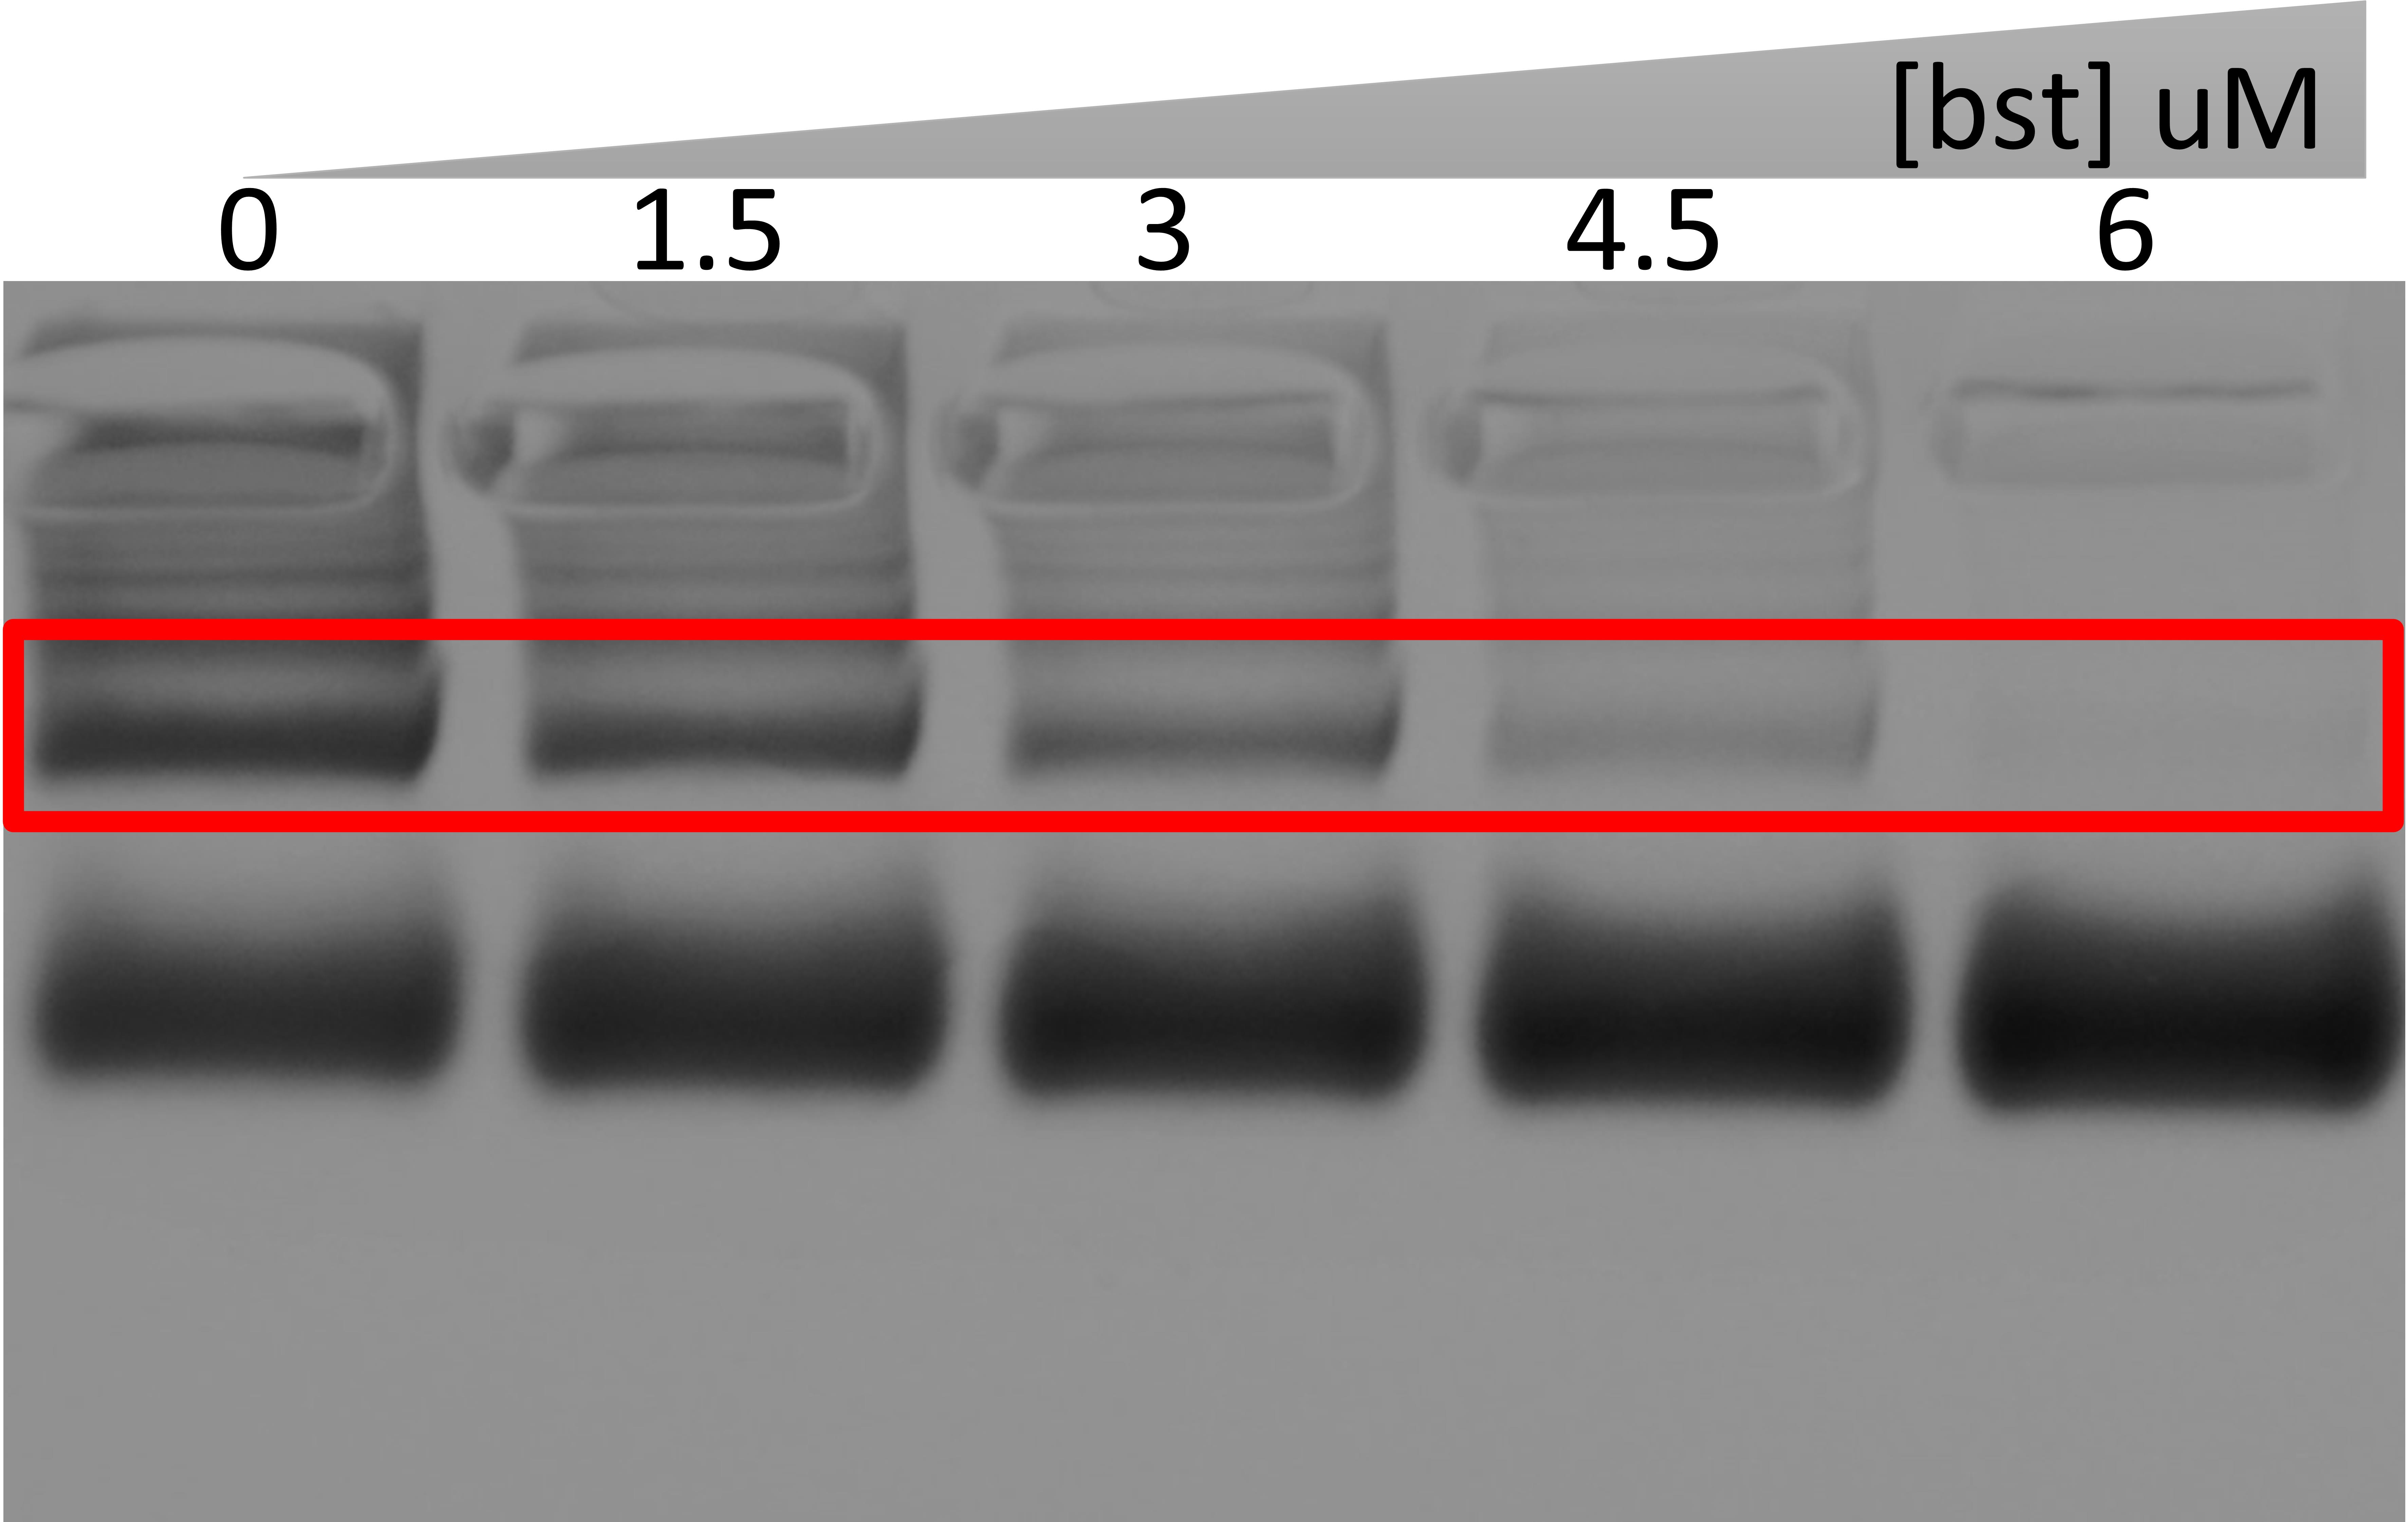


**Figure S4.** The gel image of the concentration gradients of trigger strand bst.


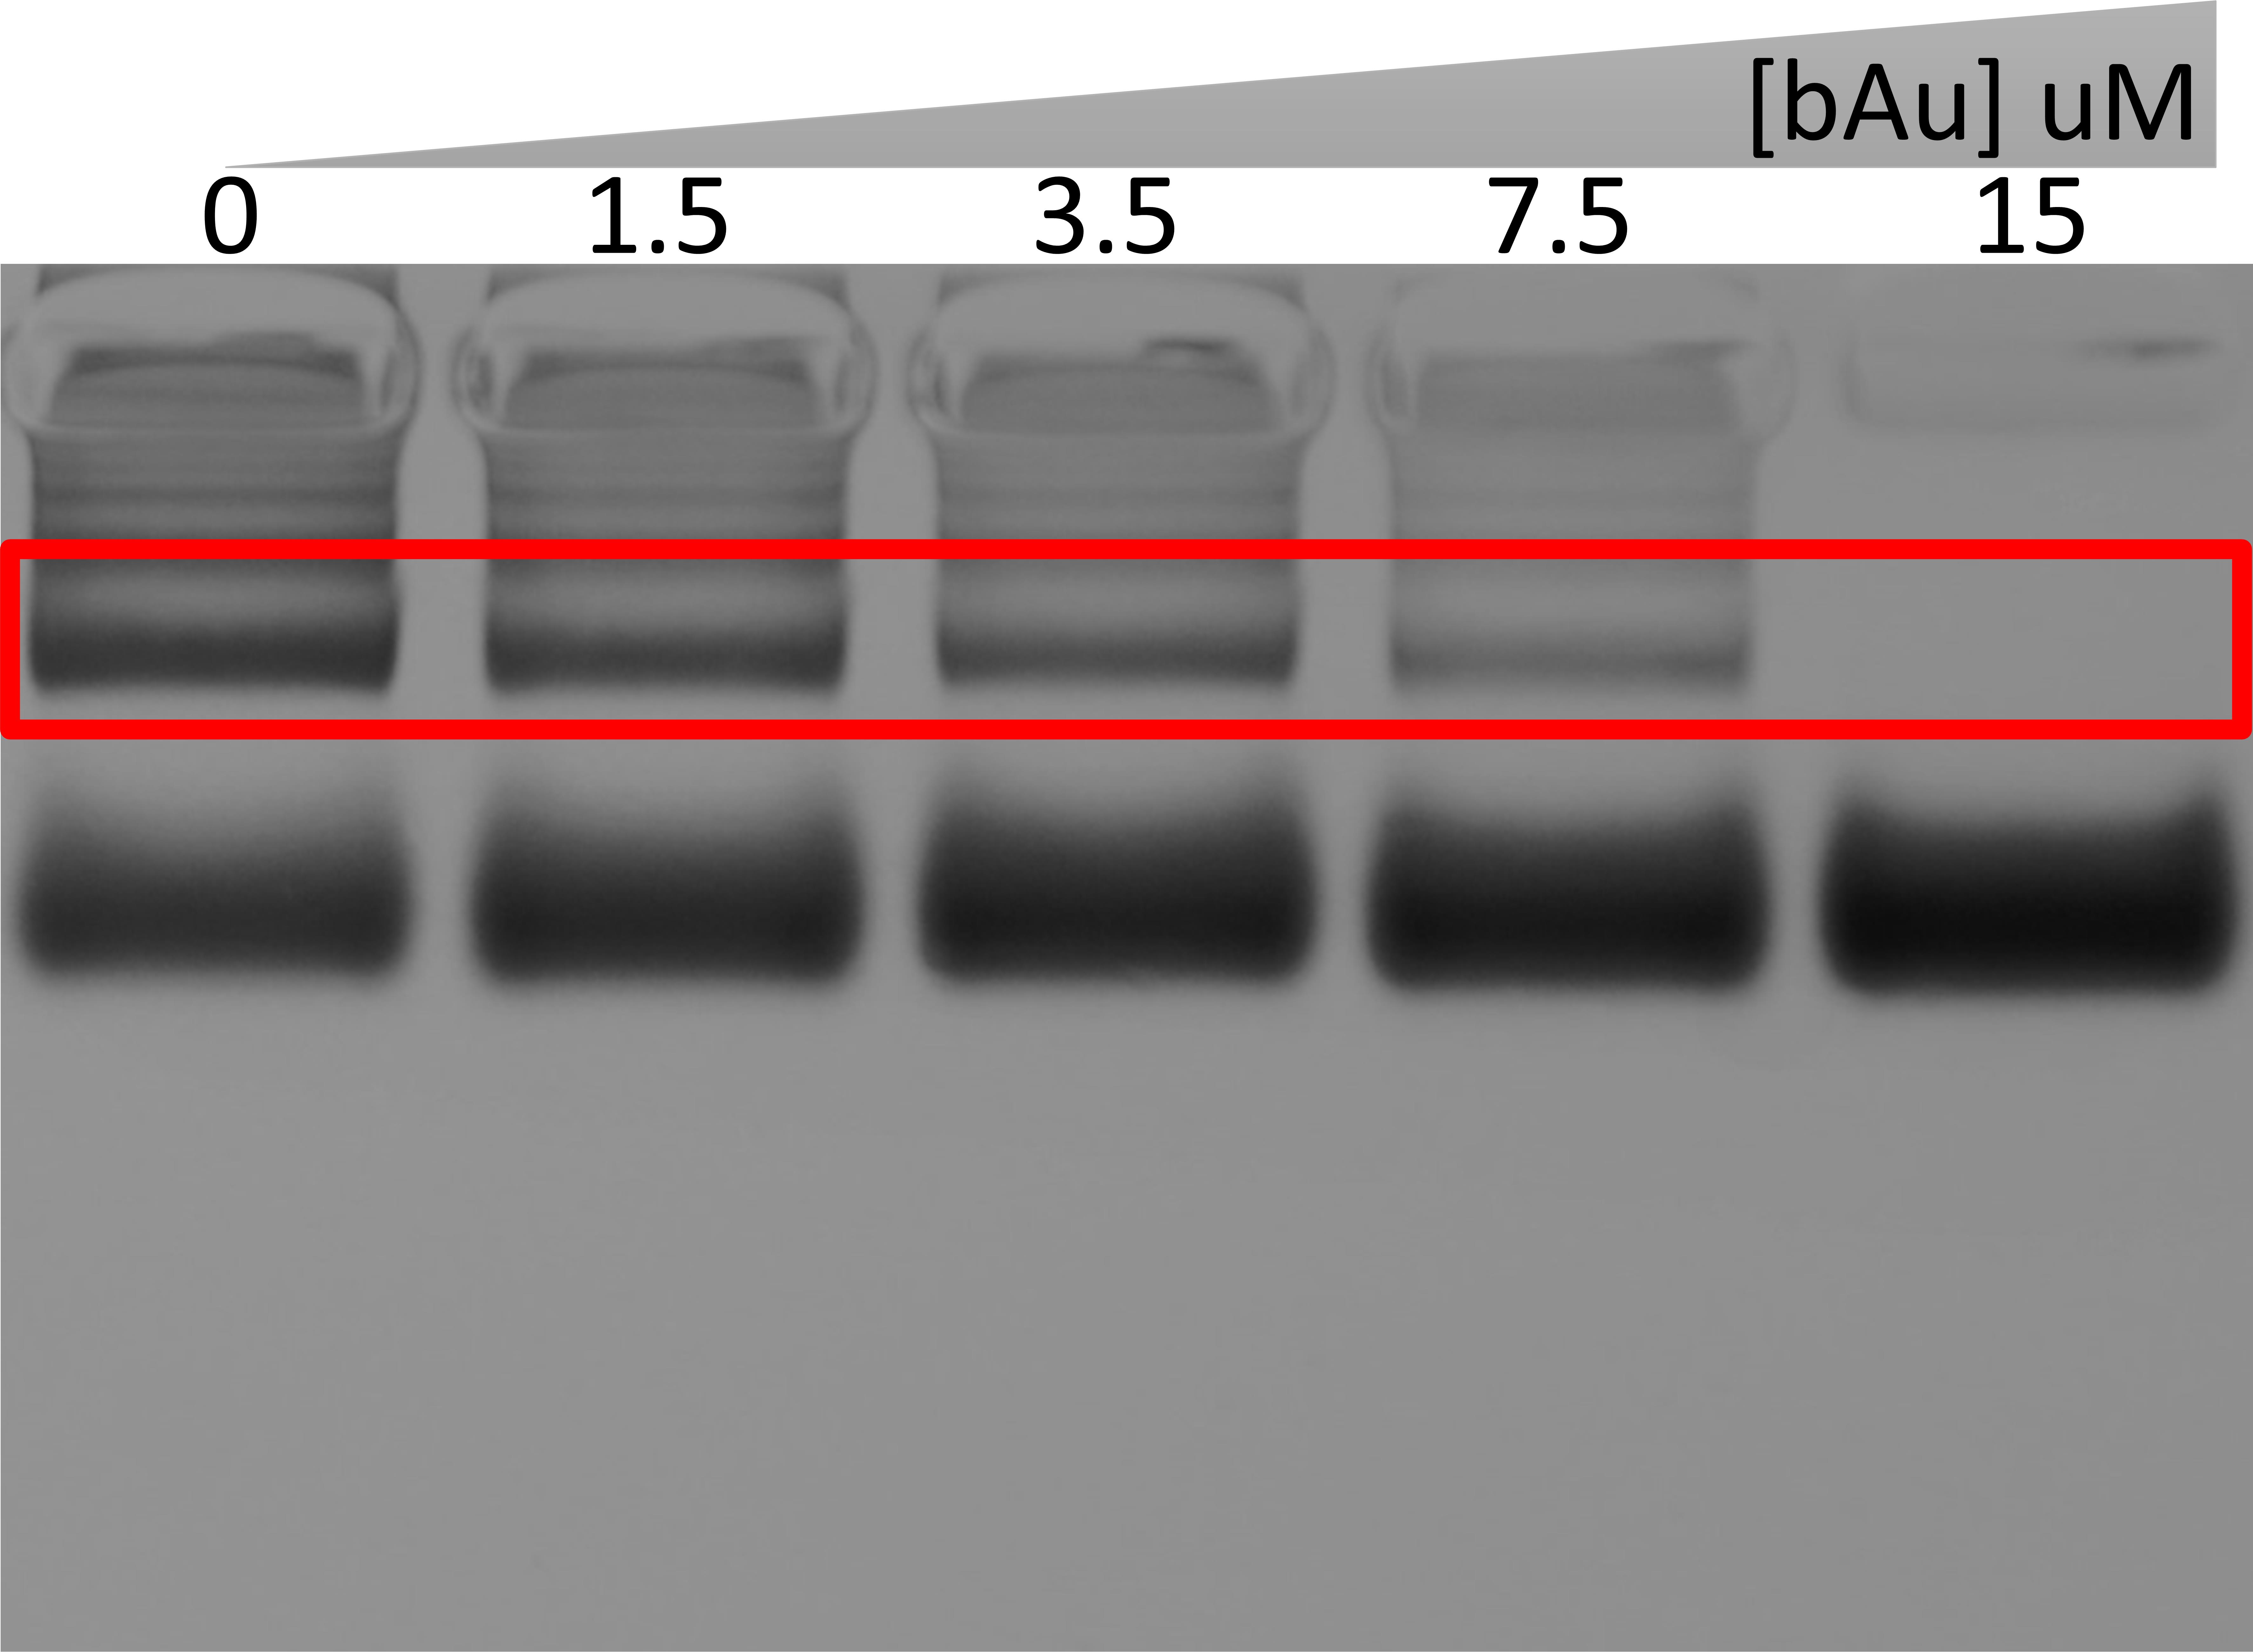


**Figure S5.** The gel image of the concentration gradients of trigger strand bAu.





**Figure S6.** Scaffold / staple layout of the two-layer rod origami (TL).


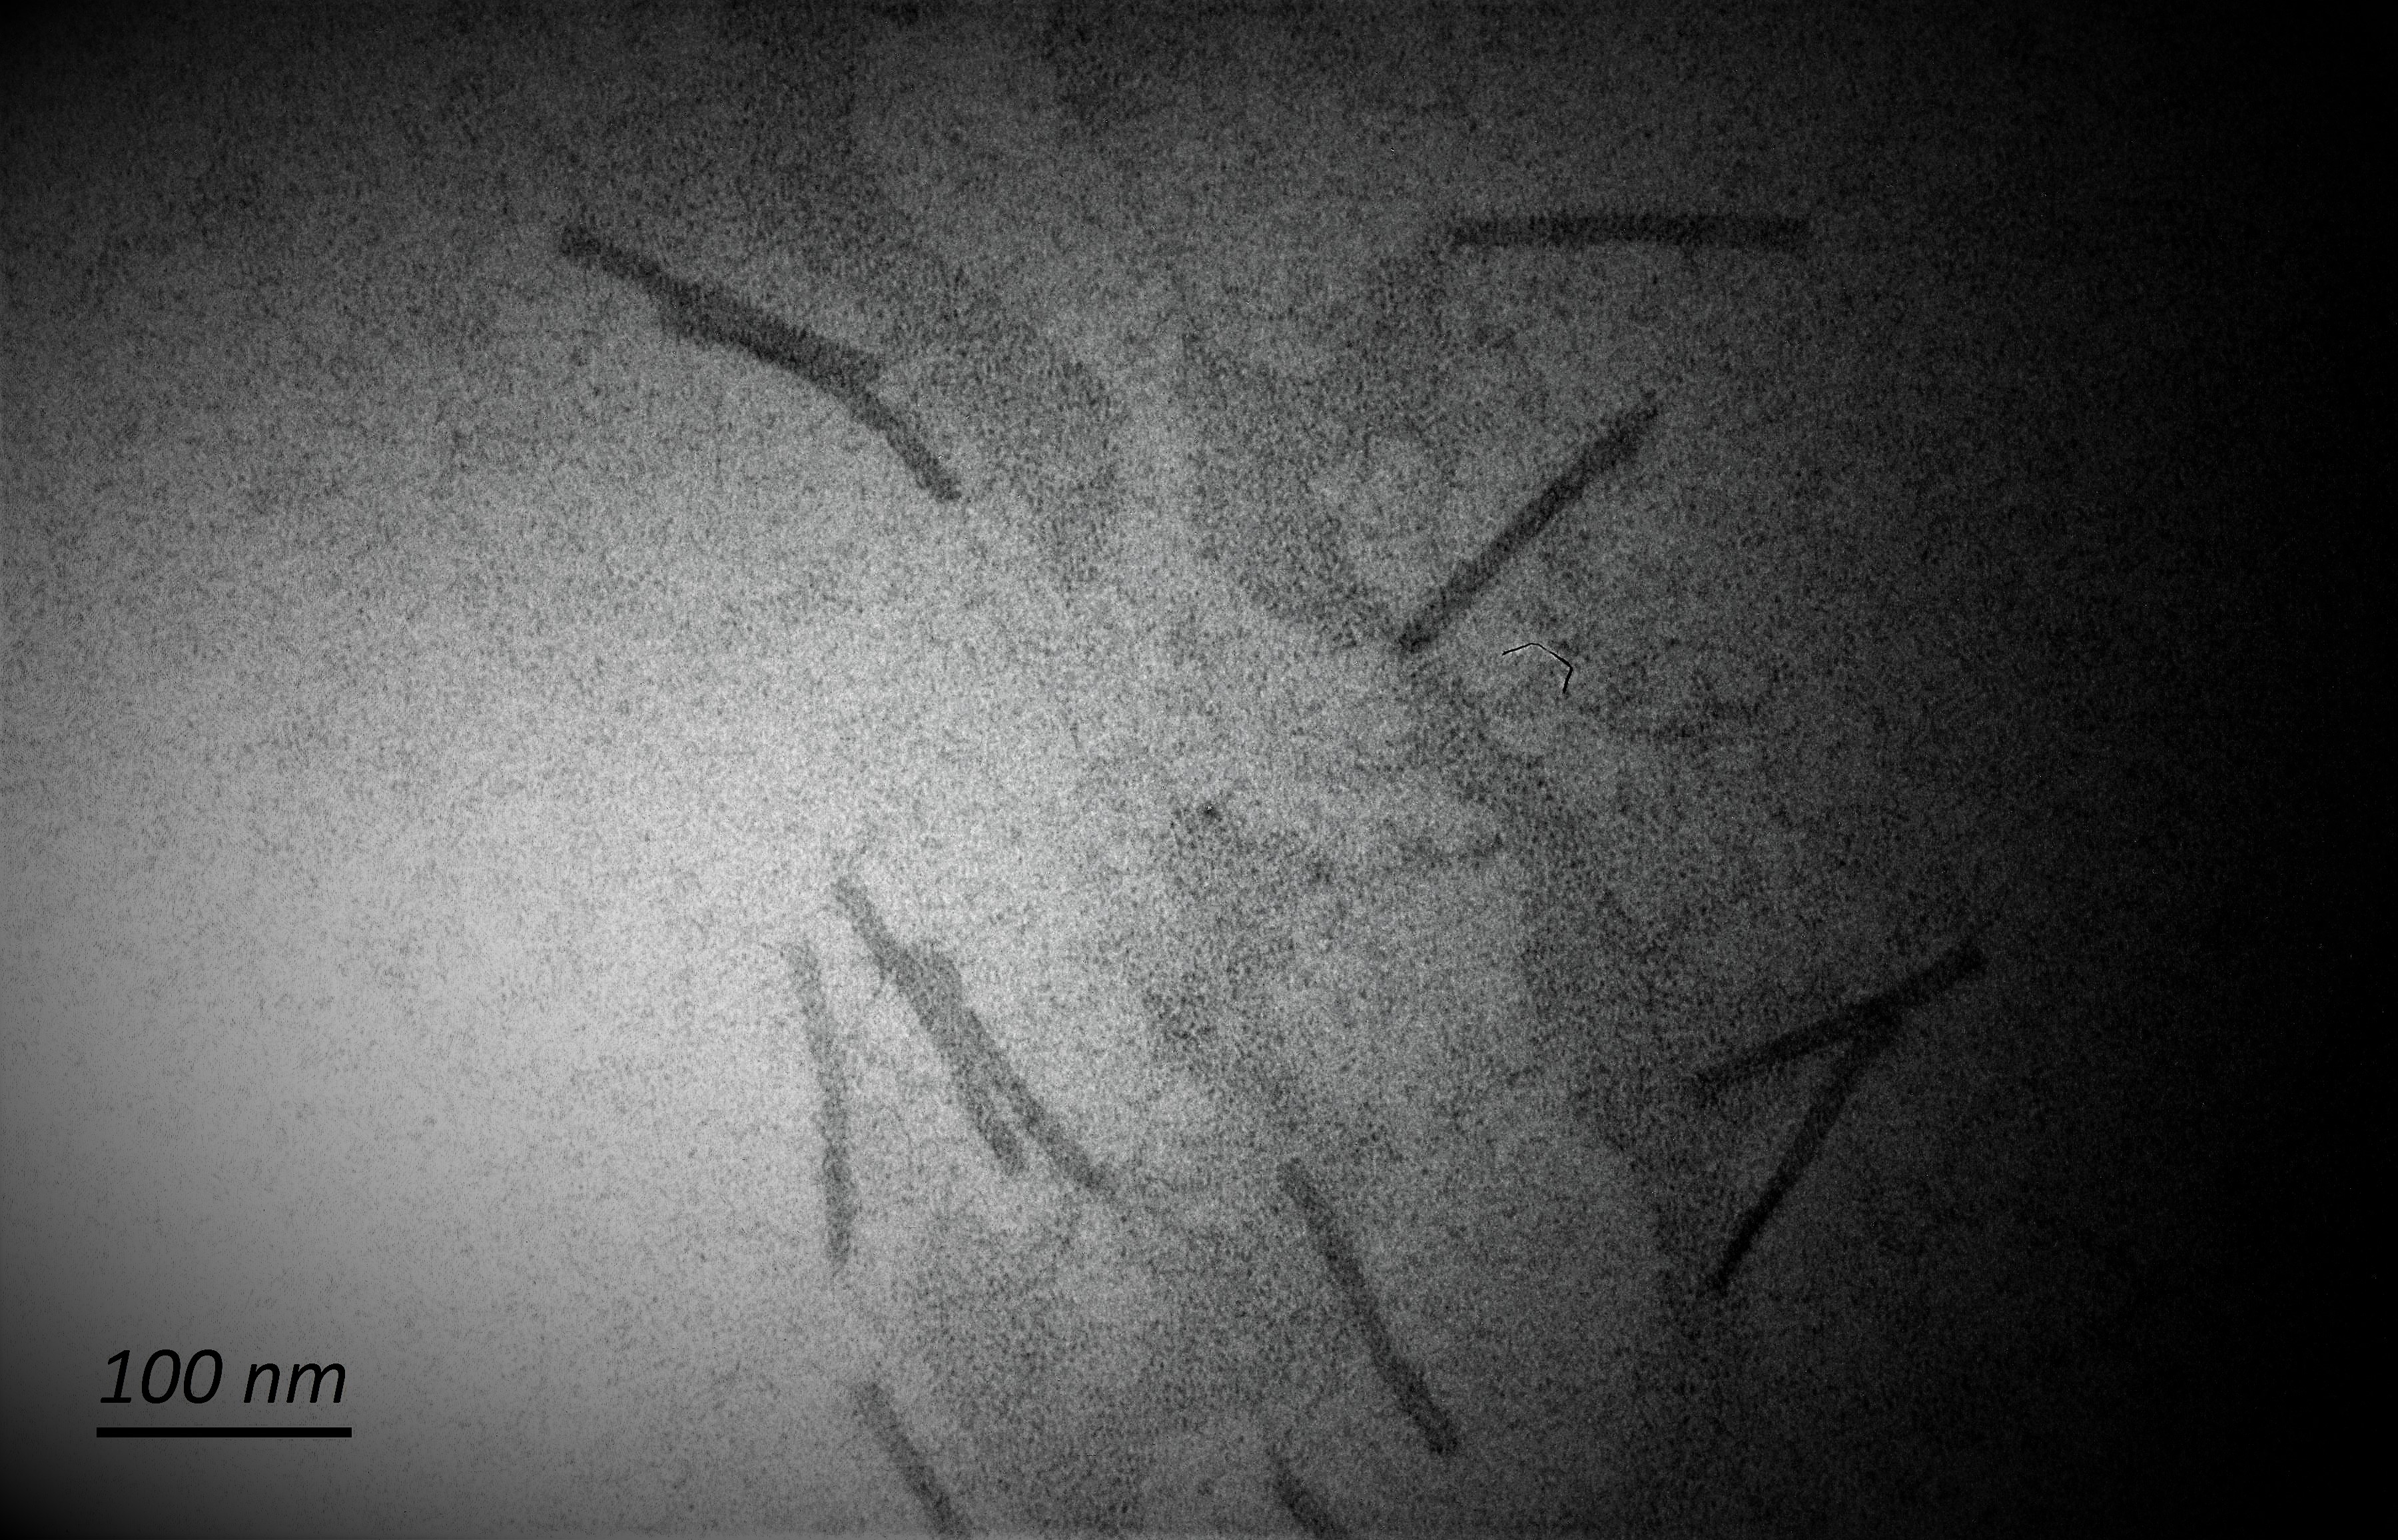


**Figure S7.** Representational TEM image of TL.


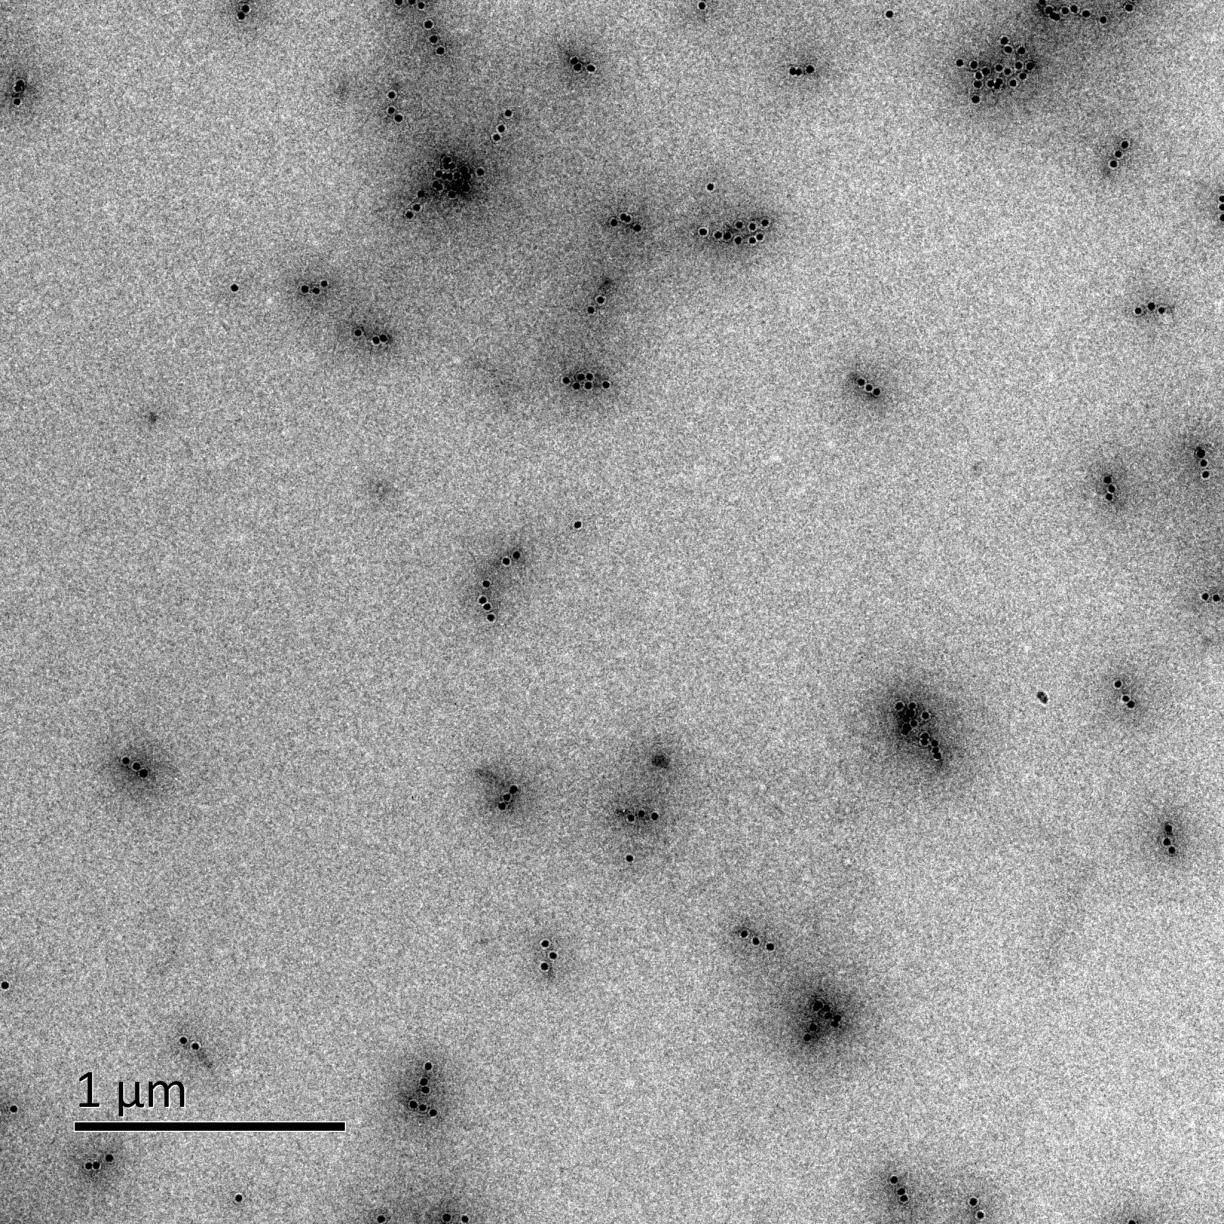
**(a)**

**
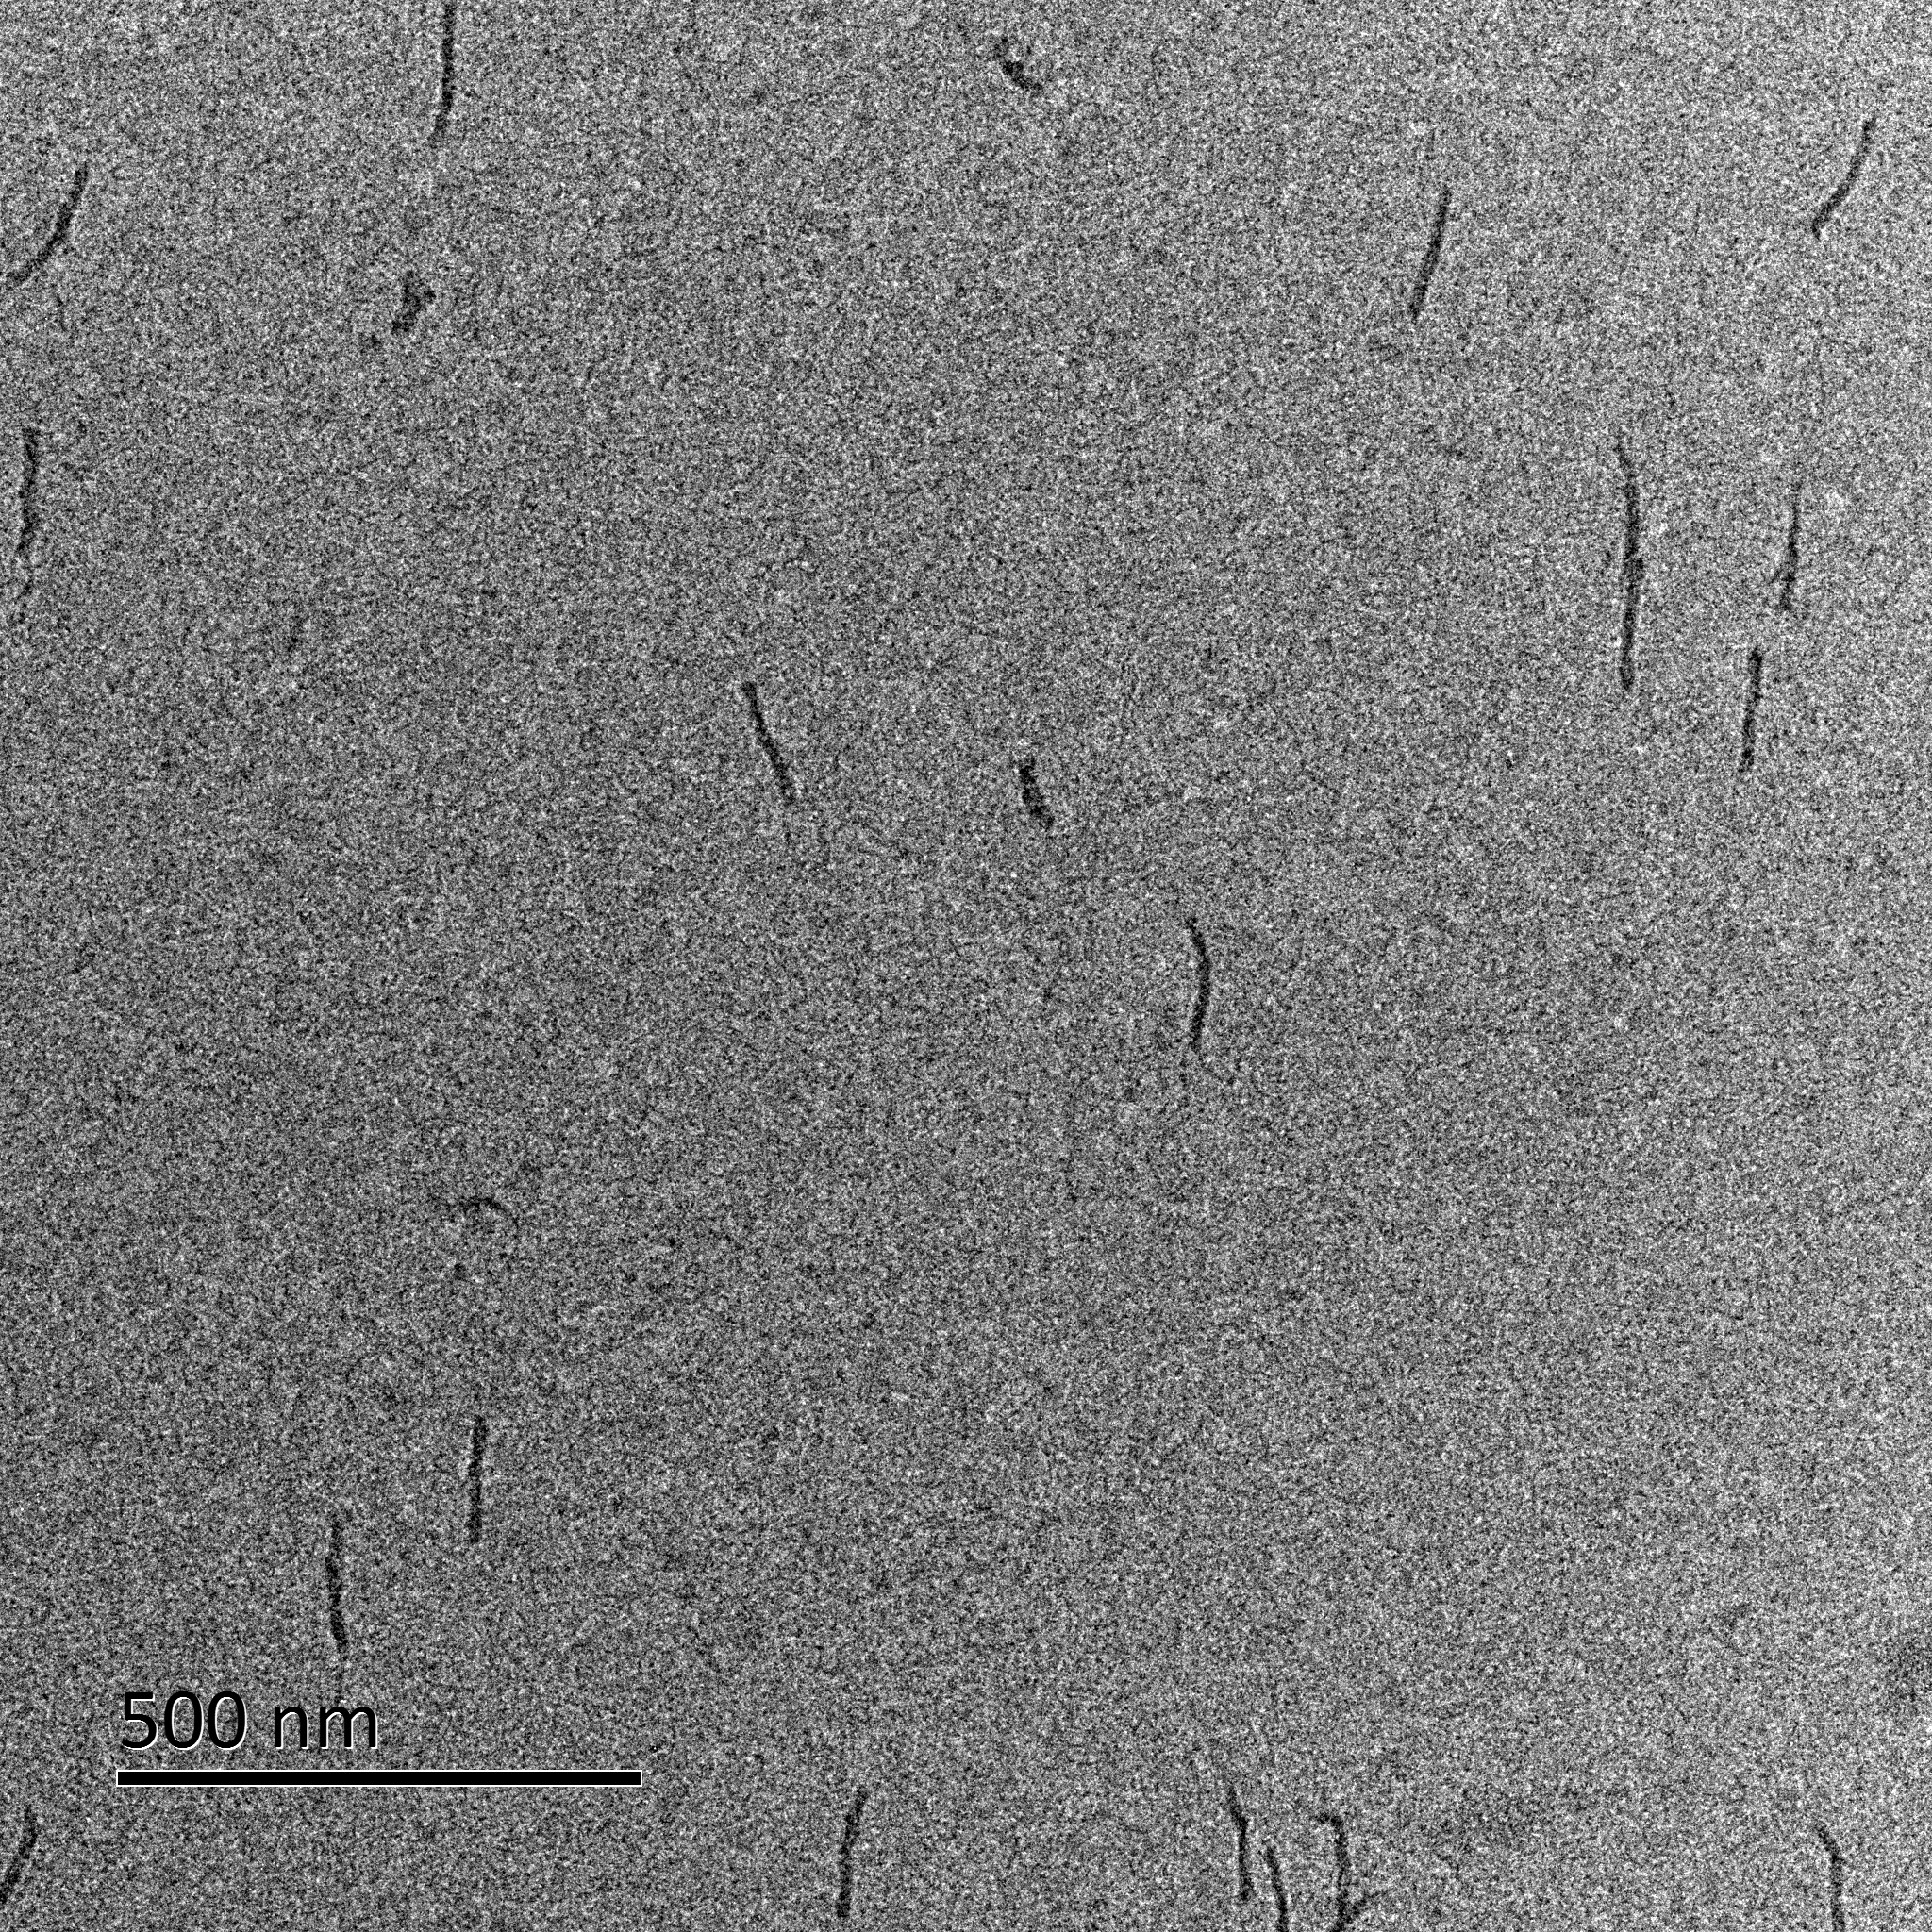
**

**(b)**

**Figure S8.** Representational TEM images of YES gate A. (a) INPUT: “0”; (b) INPUT: “1”.


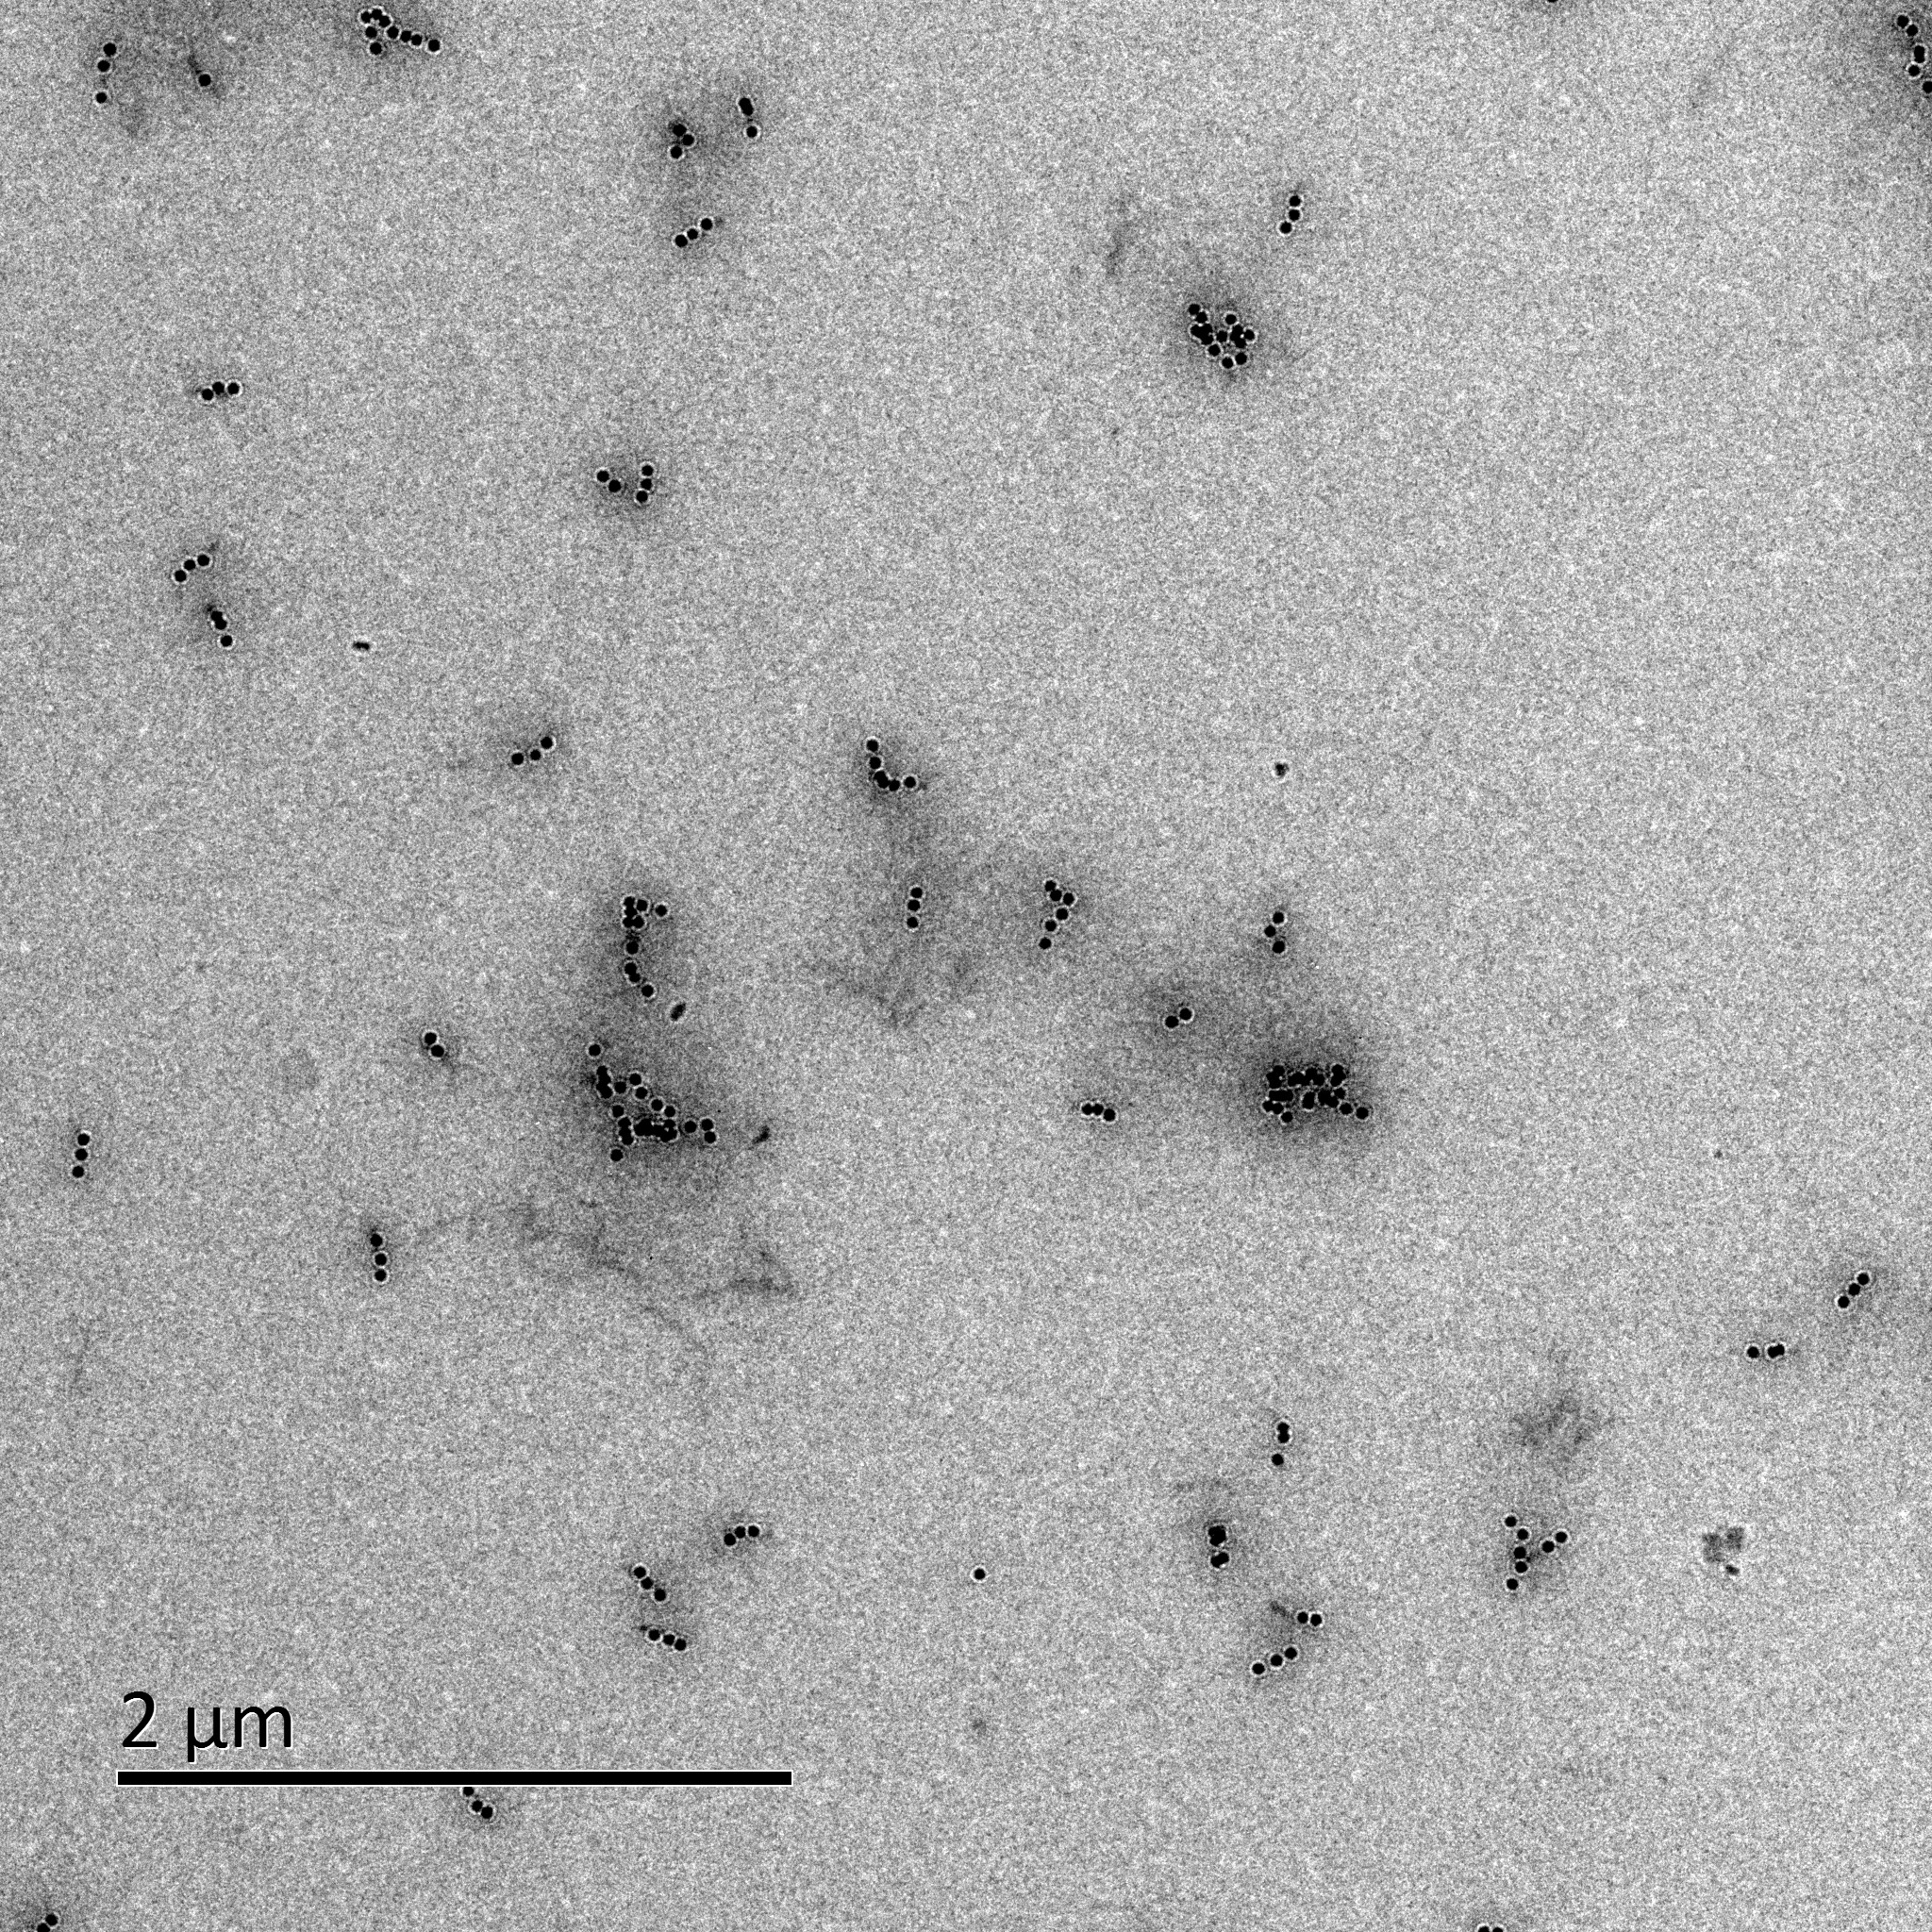
**(a)**

**
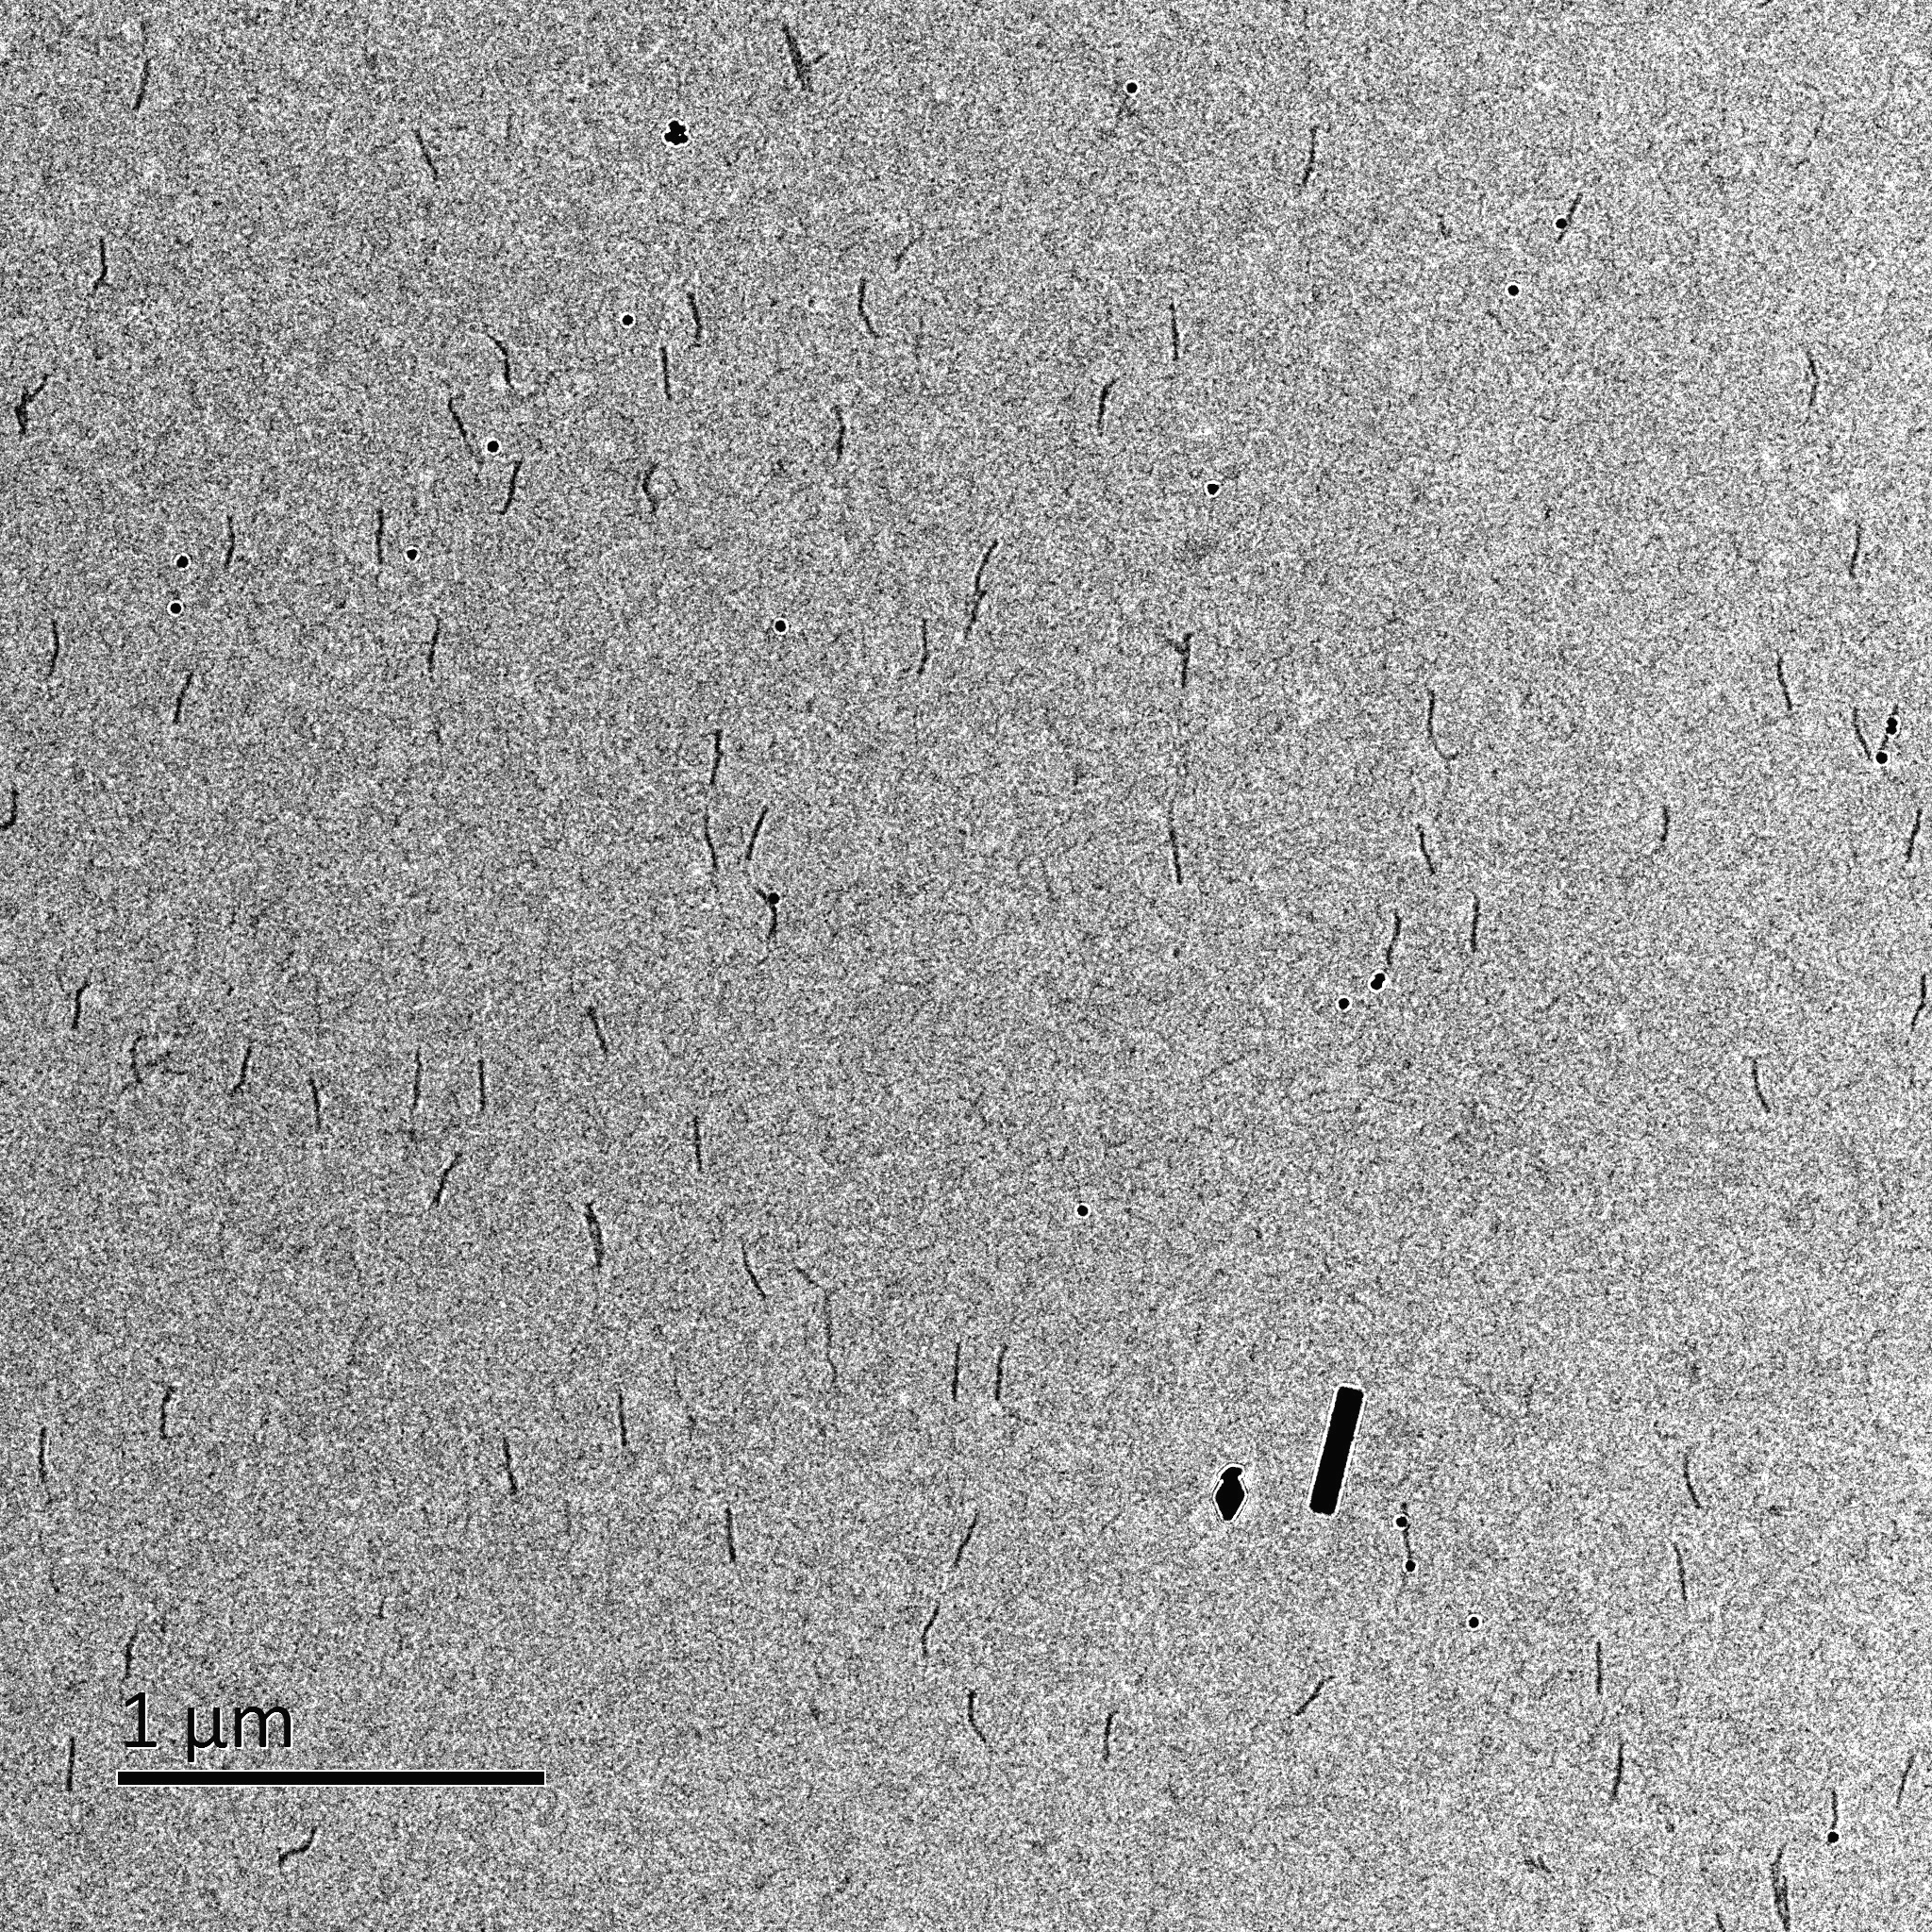
**

**(b)**

**Figure S9.** Representational TEM images of YES gate B. (a) INPUT: “0”; (b) INPUT: “1”.


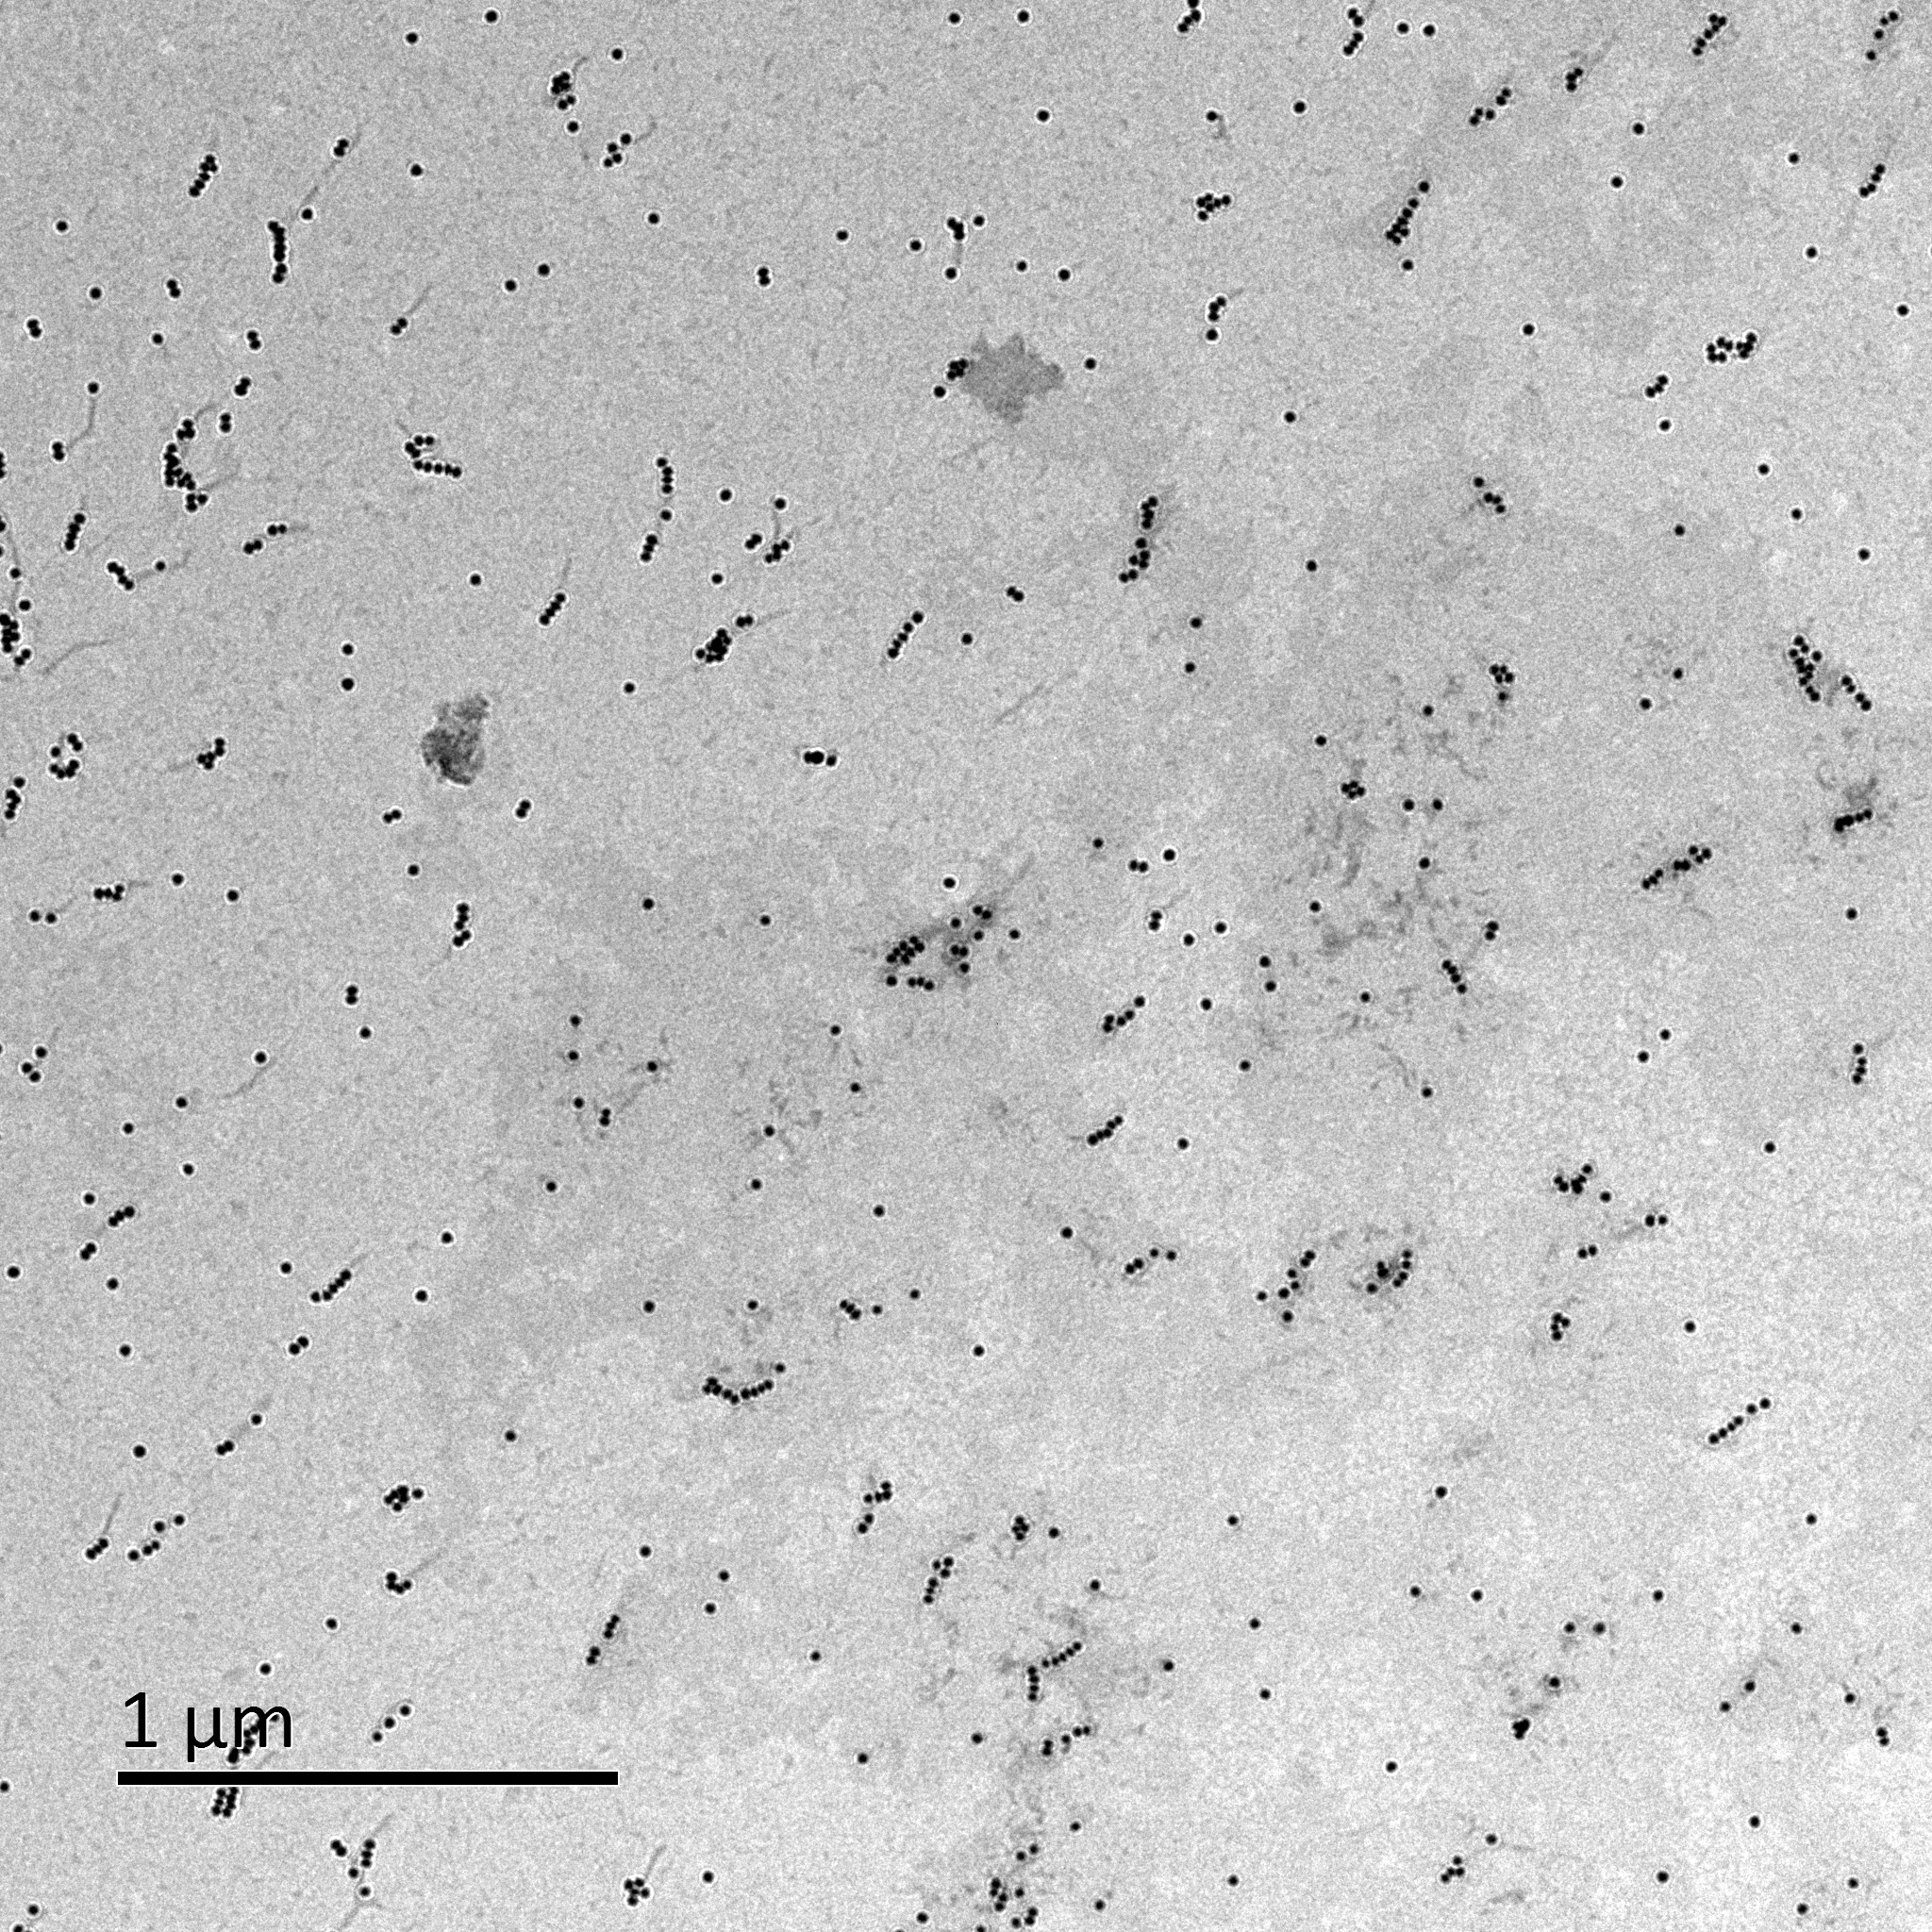

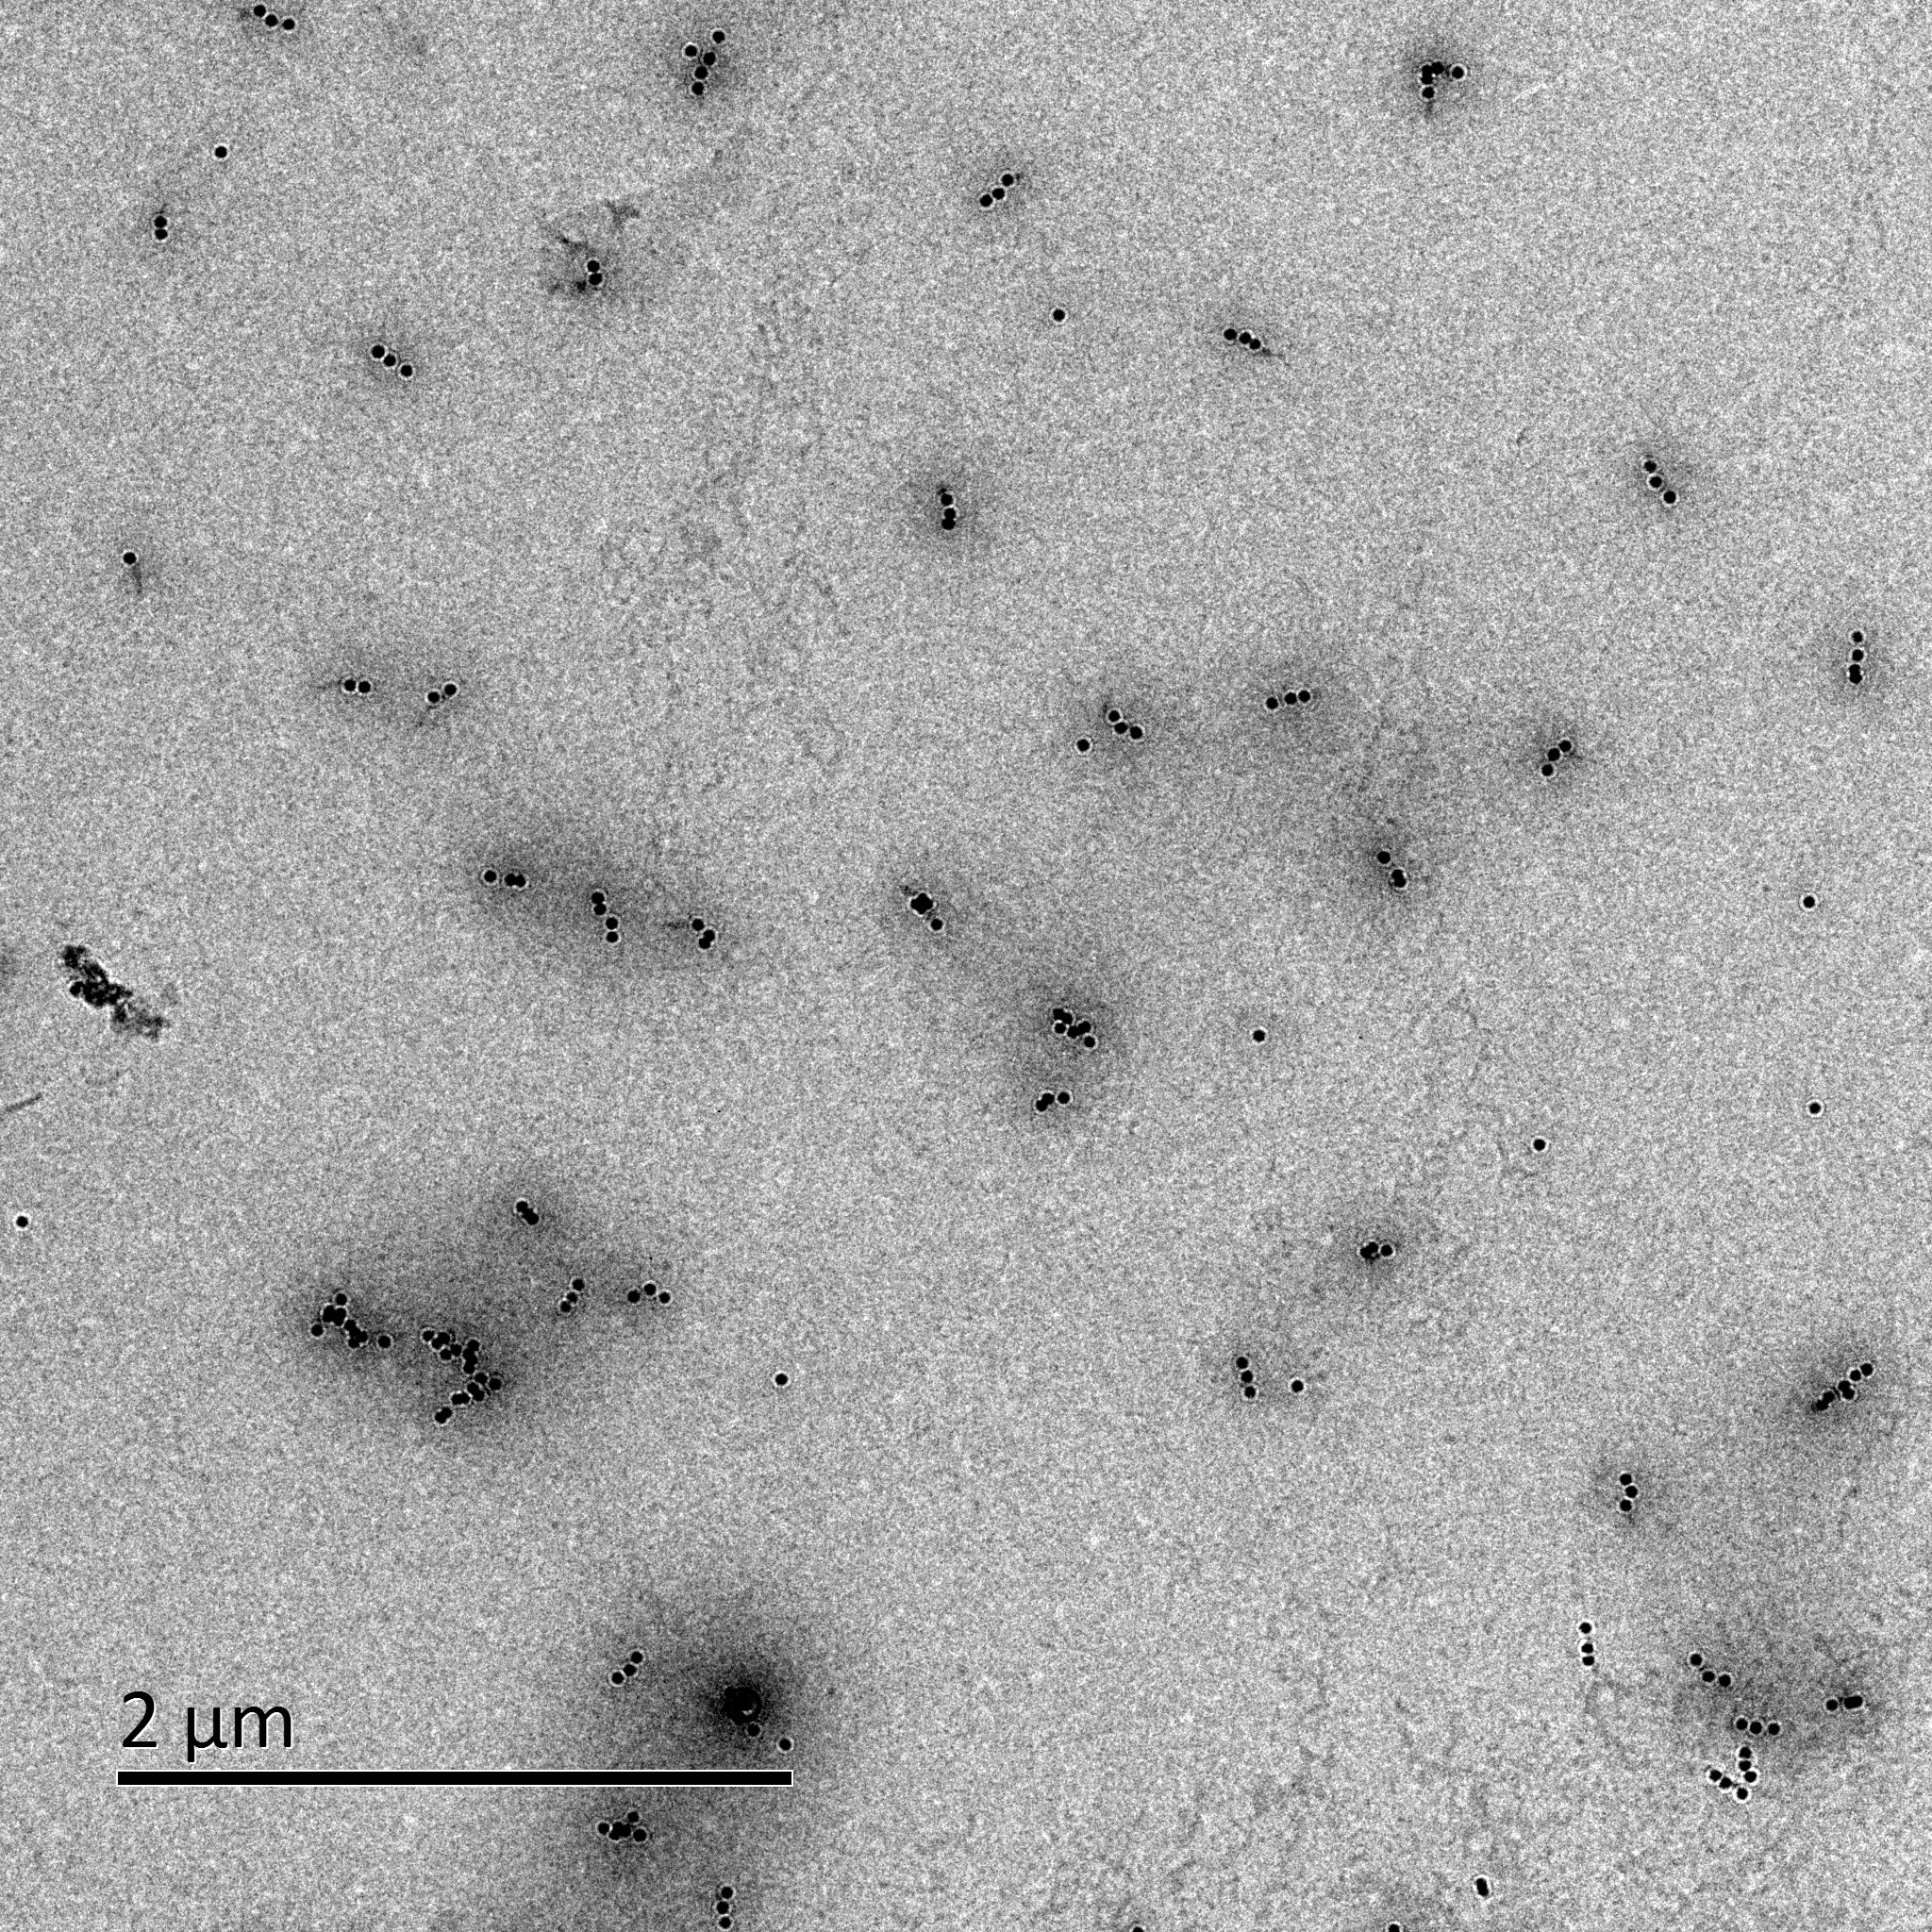

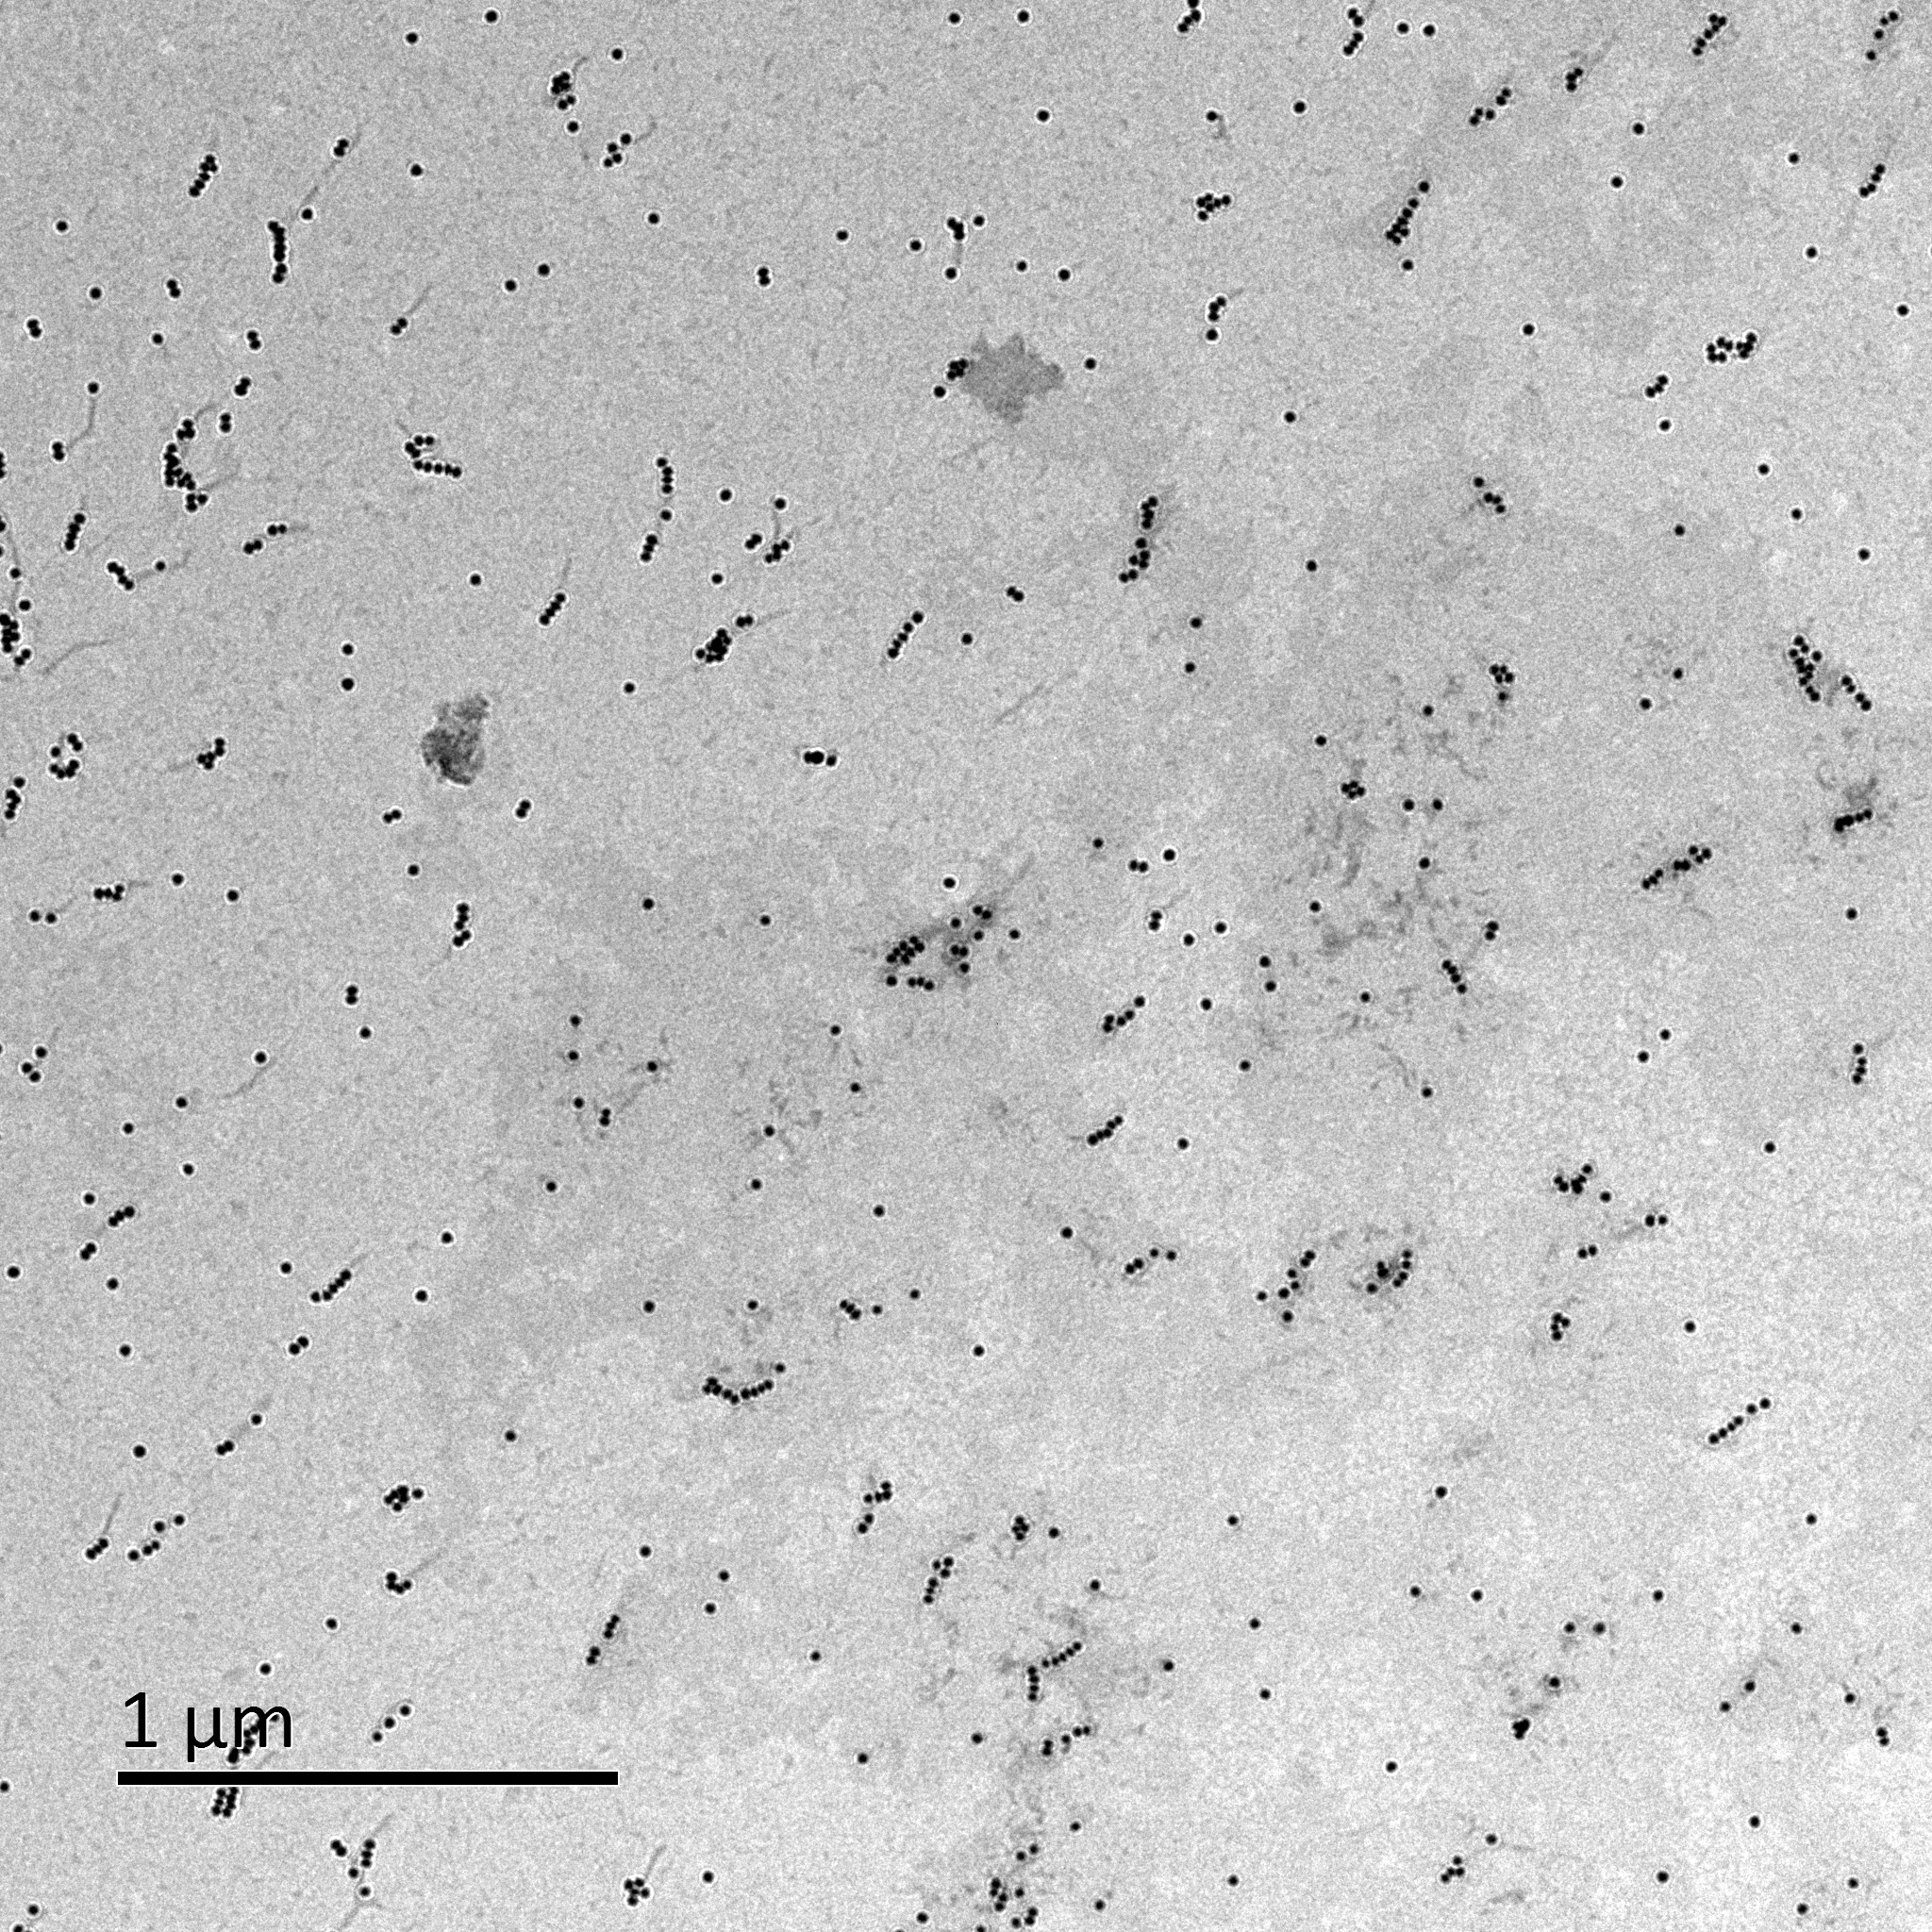

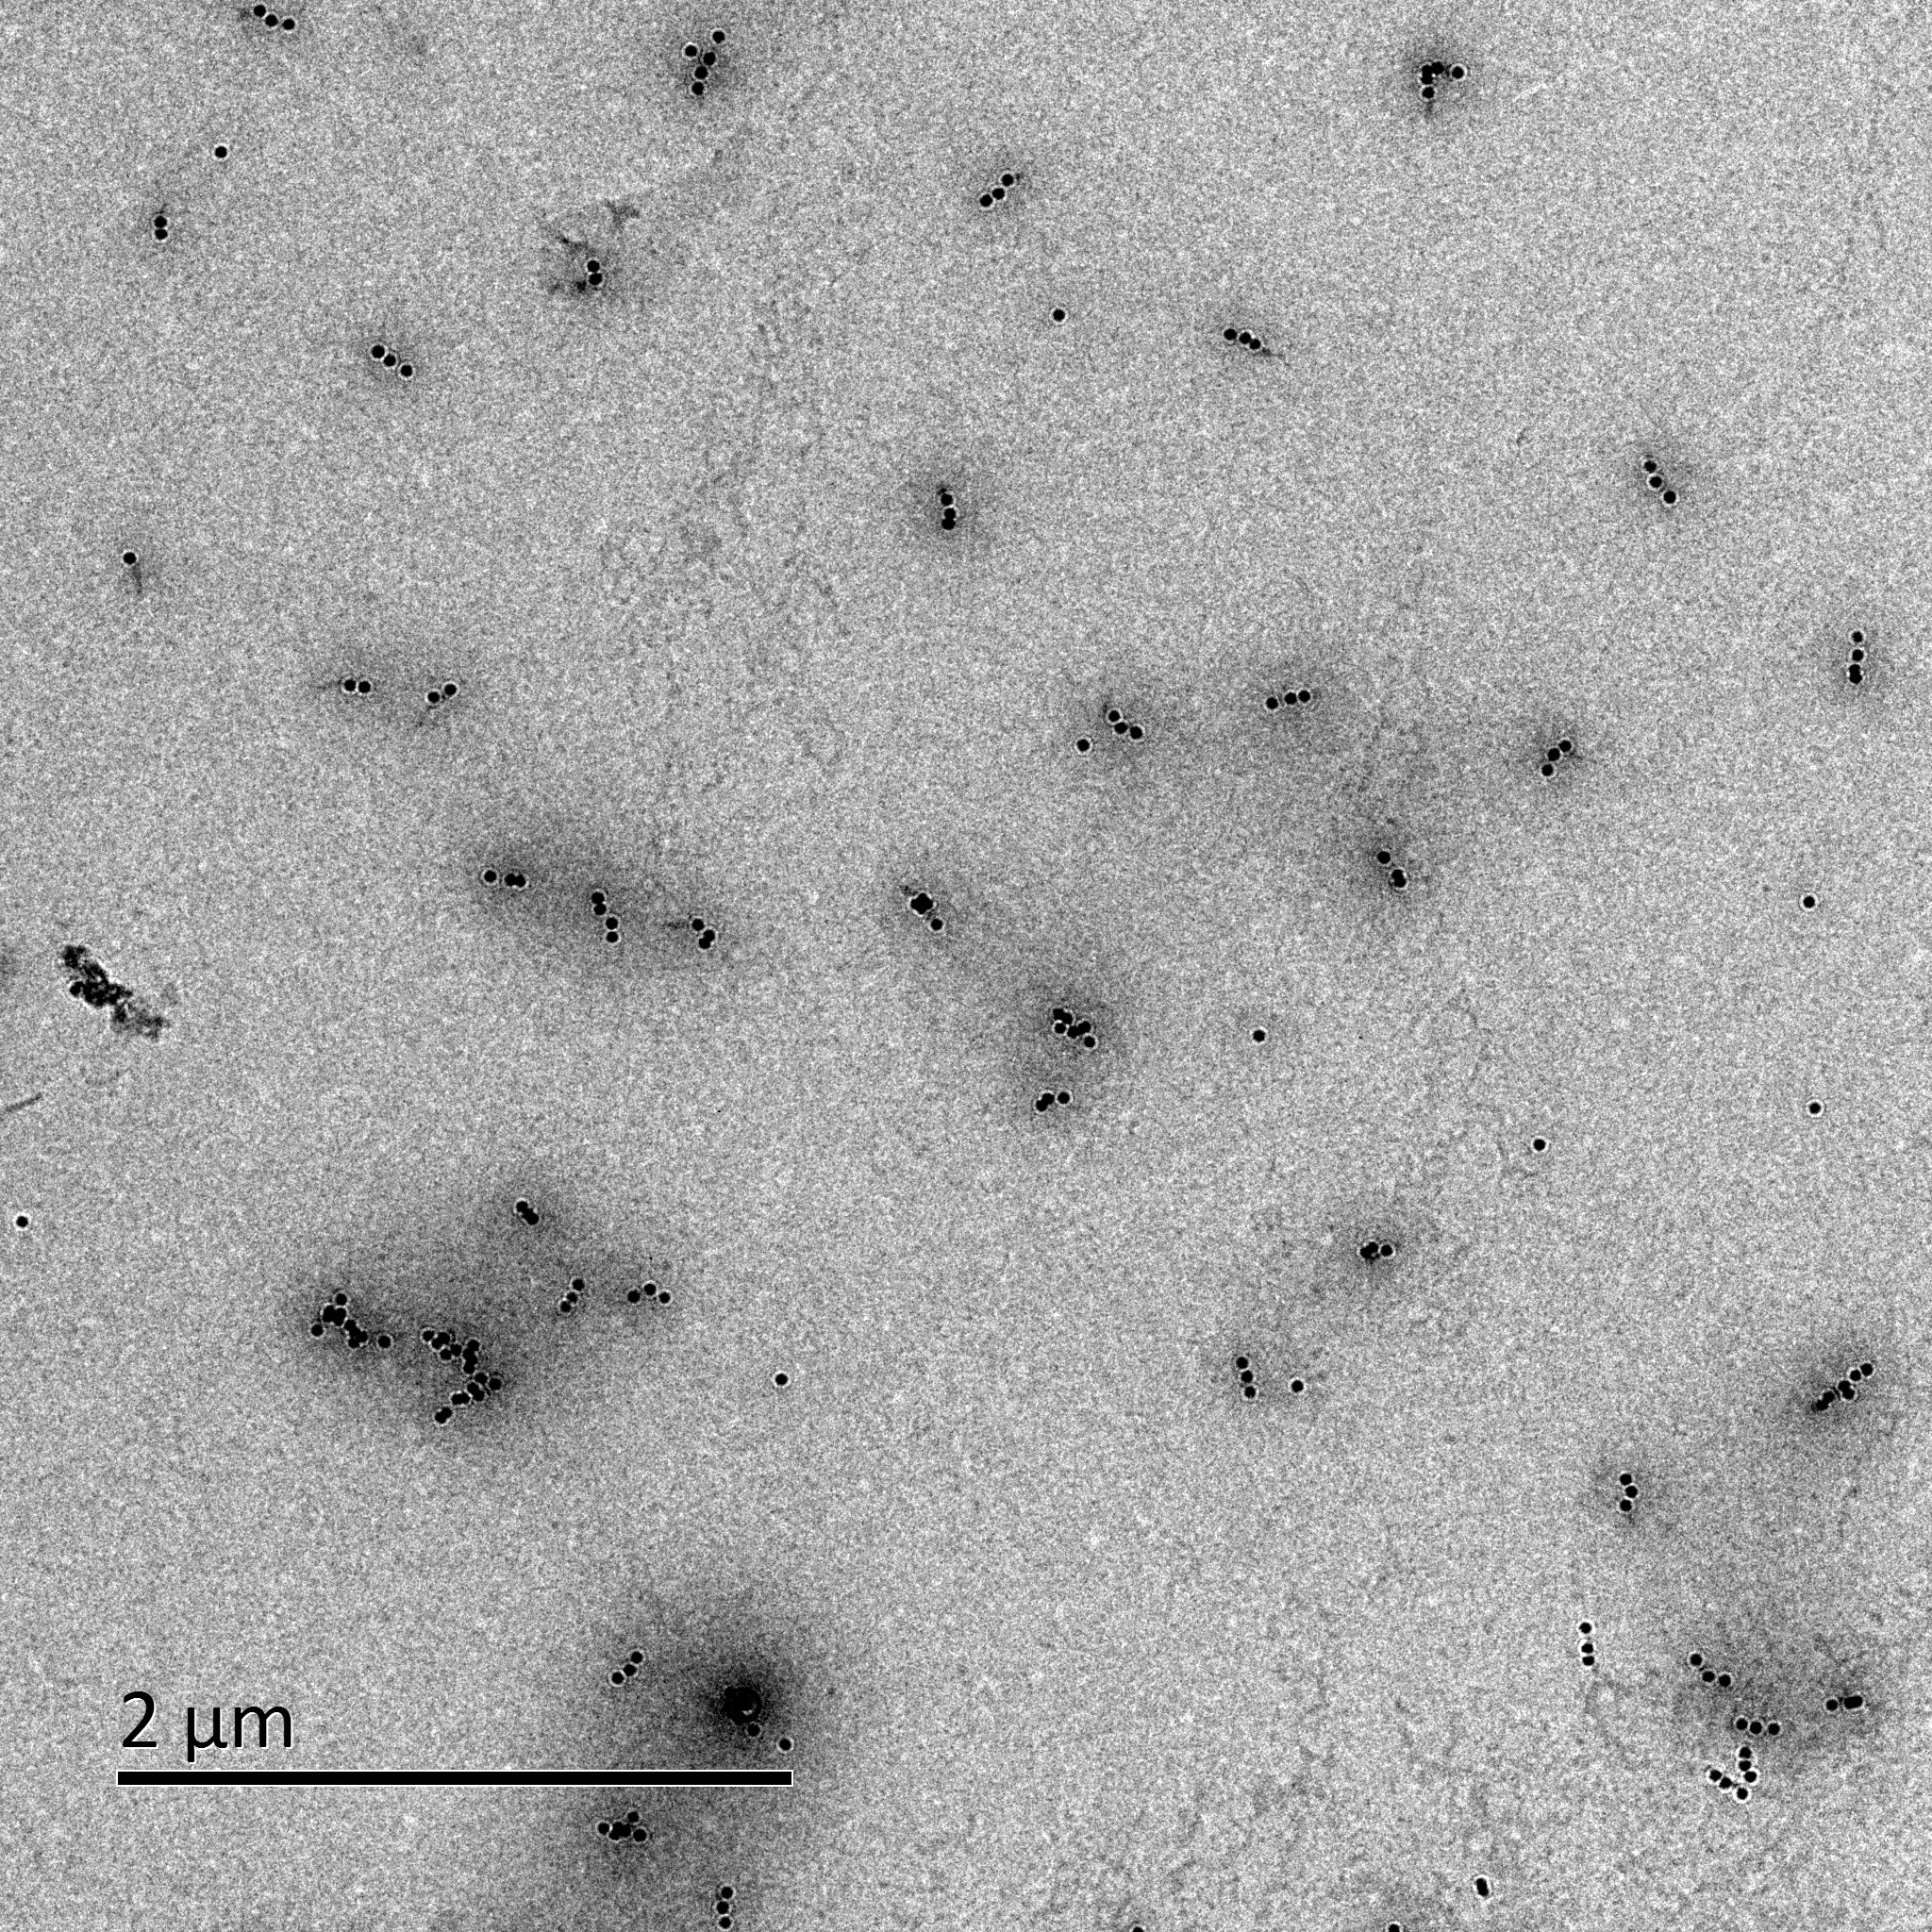
**(a) (b)**


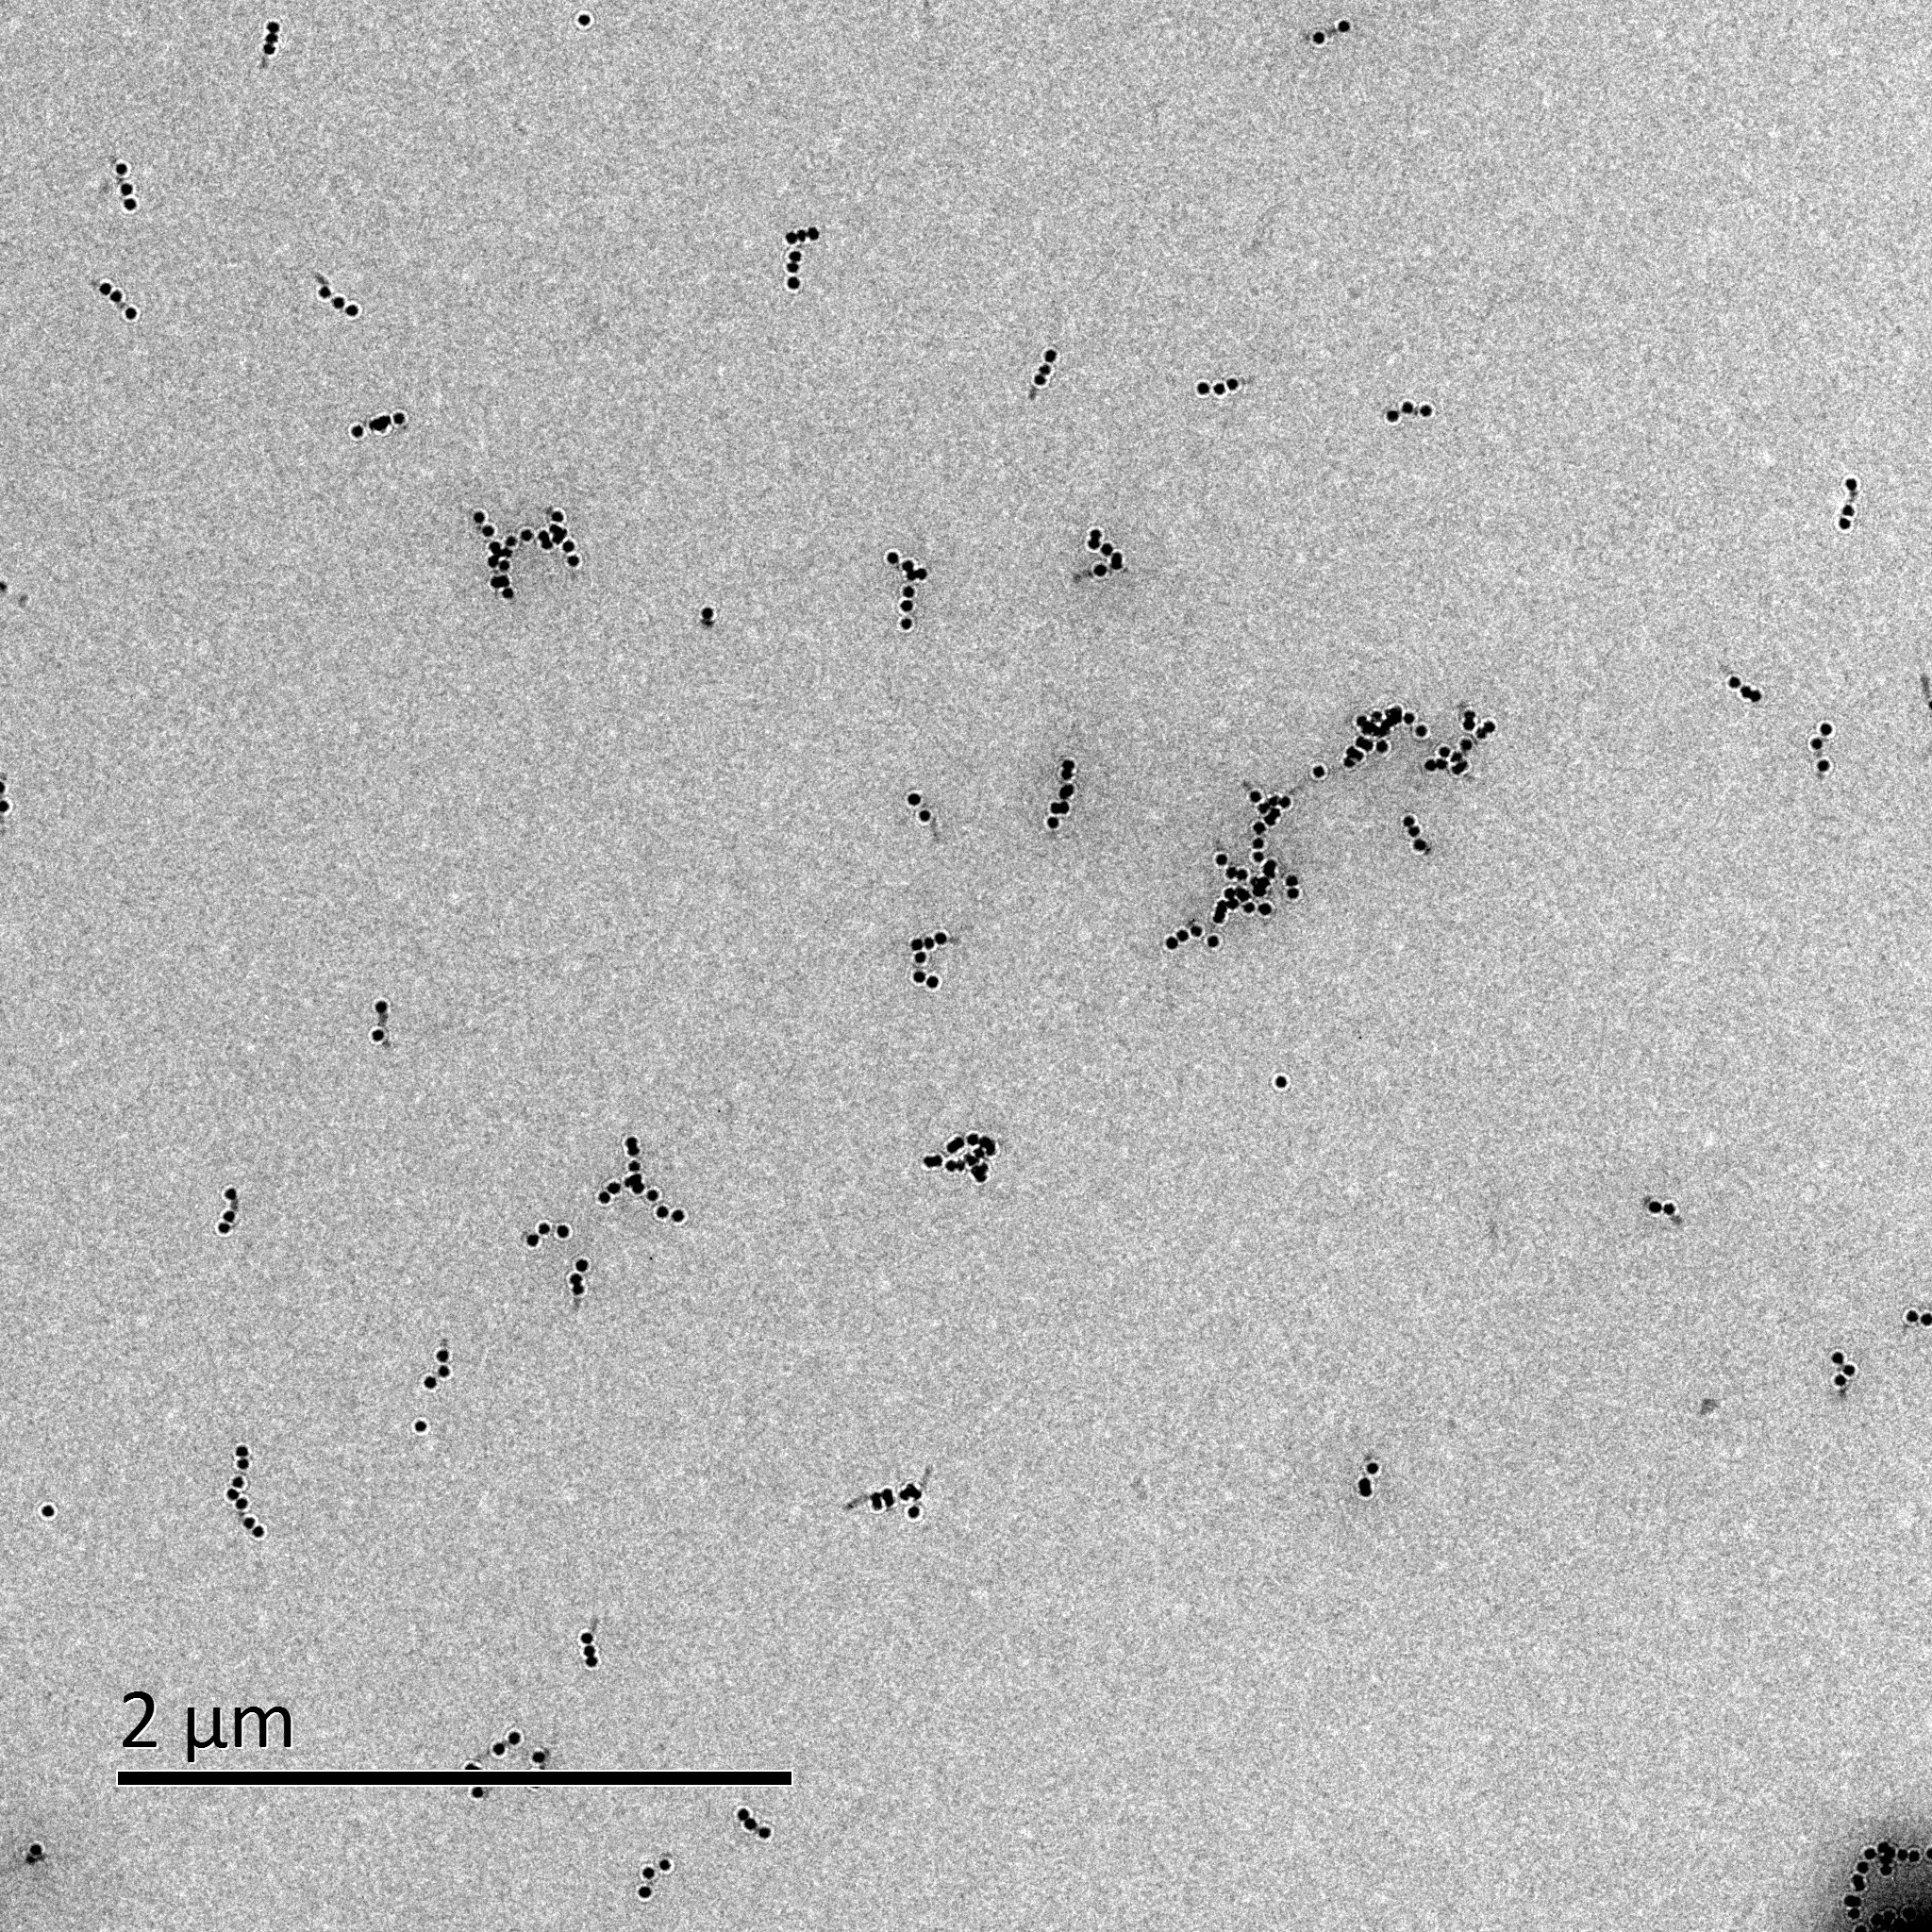

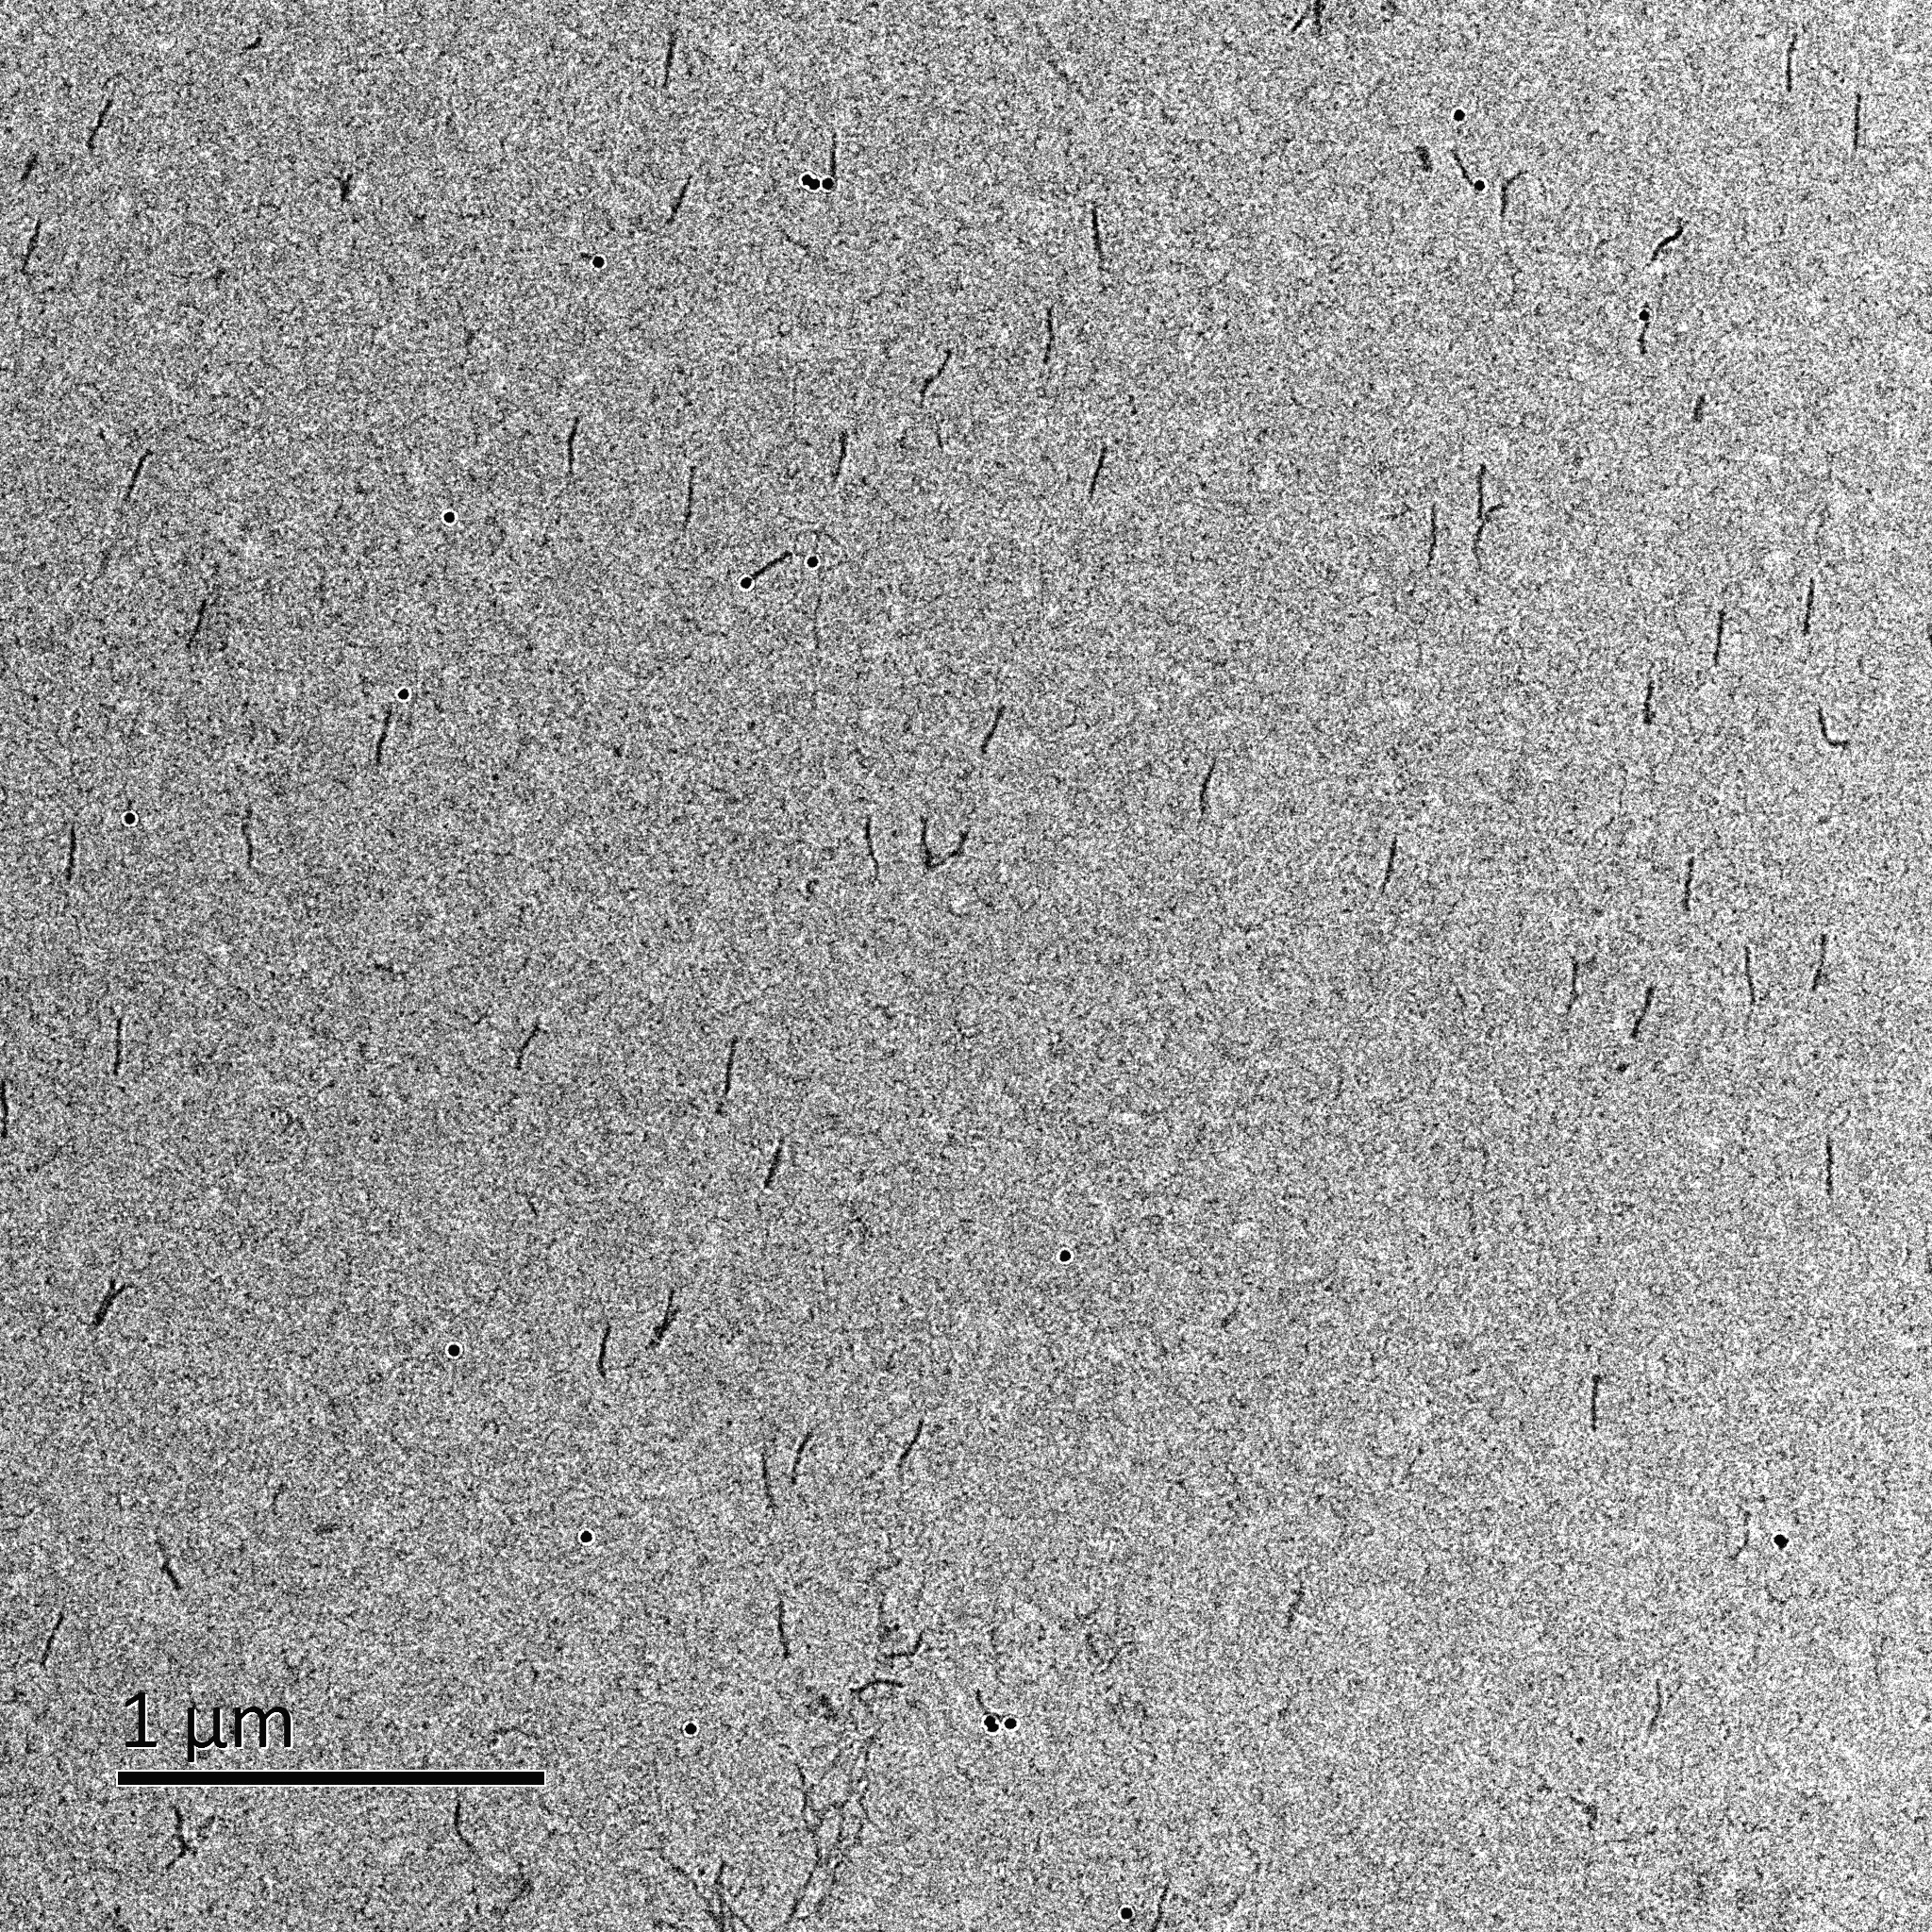
**(c) (d)**

**Figure S10.** Representational TEM images of AND gate. (a) INPUT: “00”; (b) INPUT: “10”; (c) INPUT: “01”; (d) INPUT: “11”.


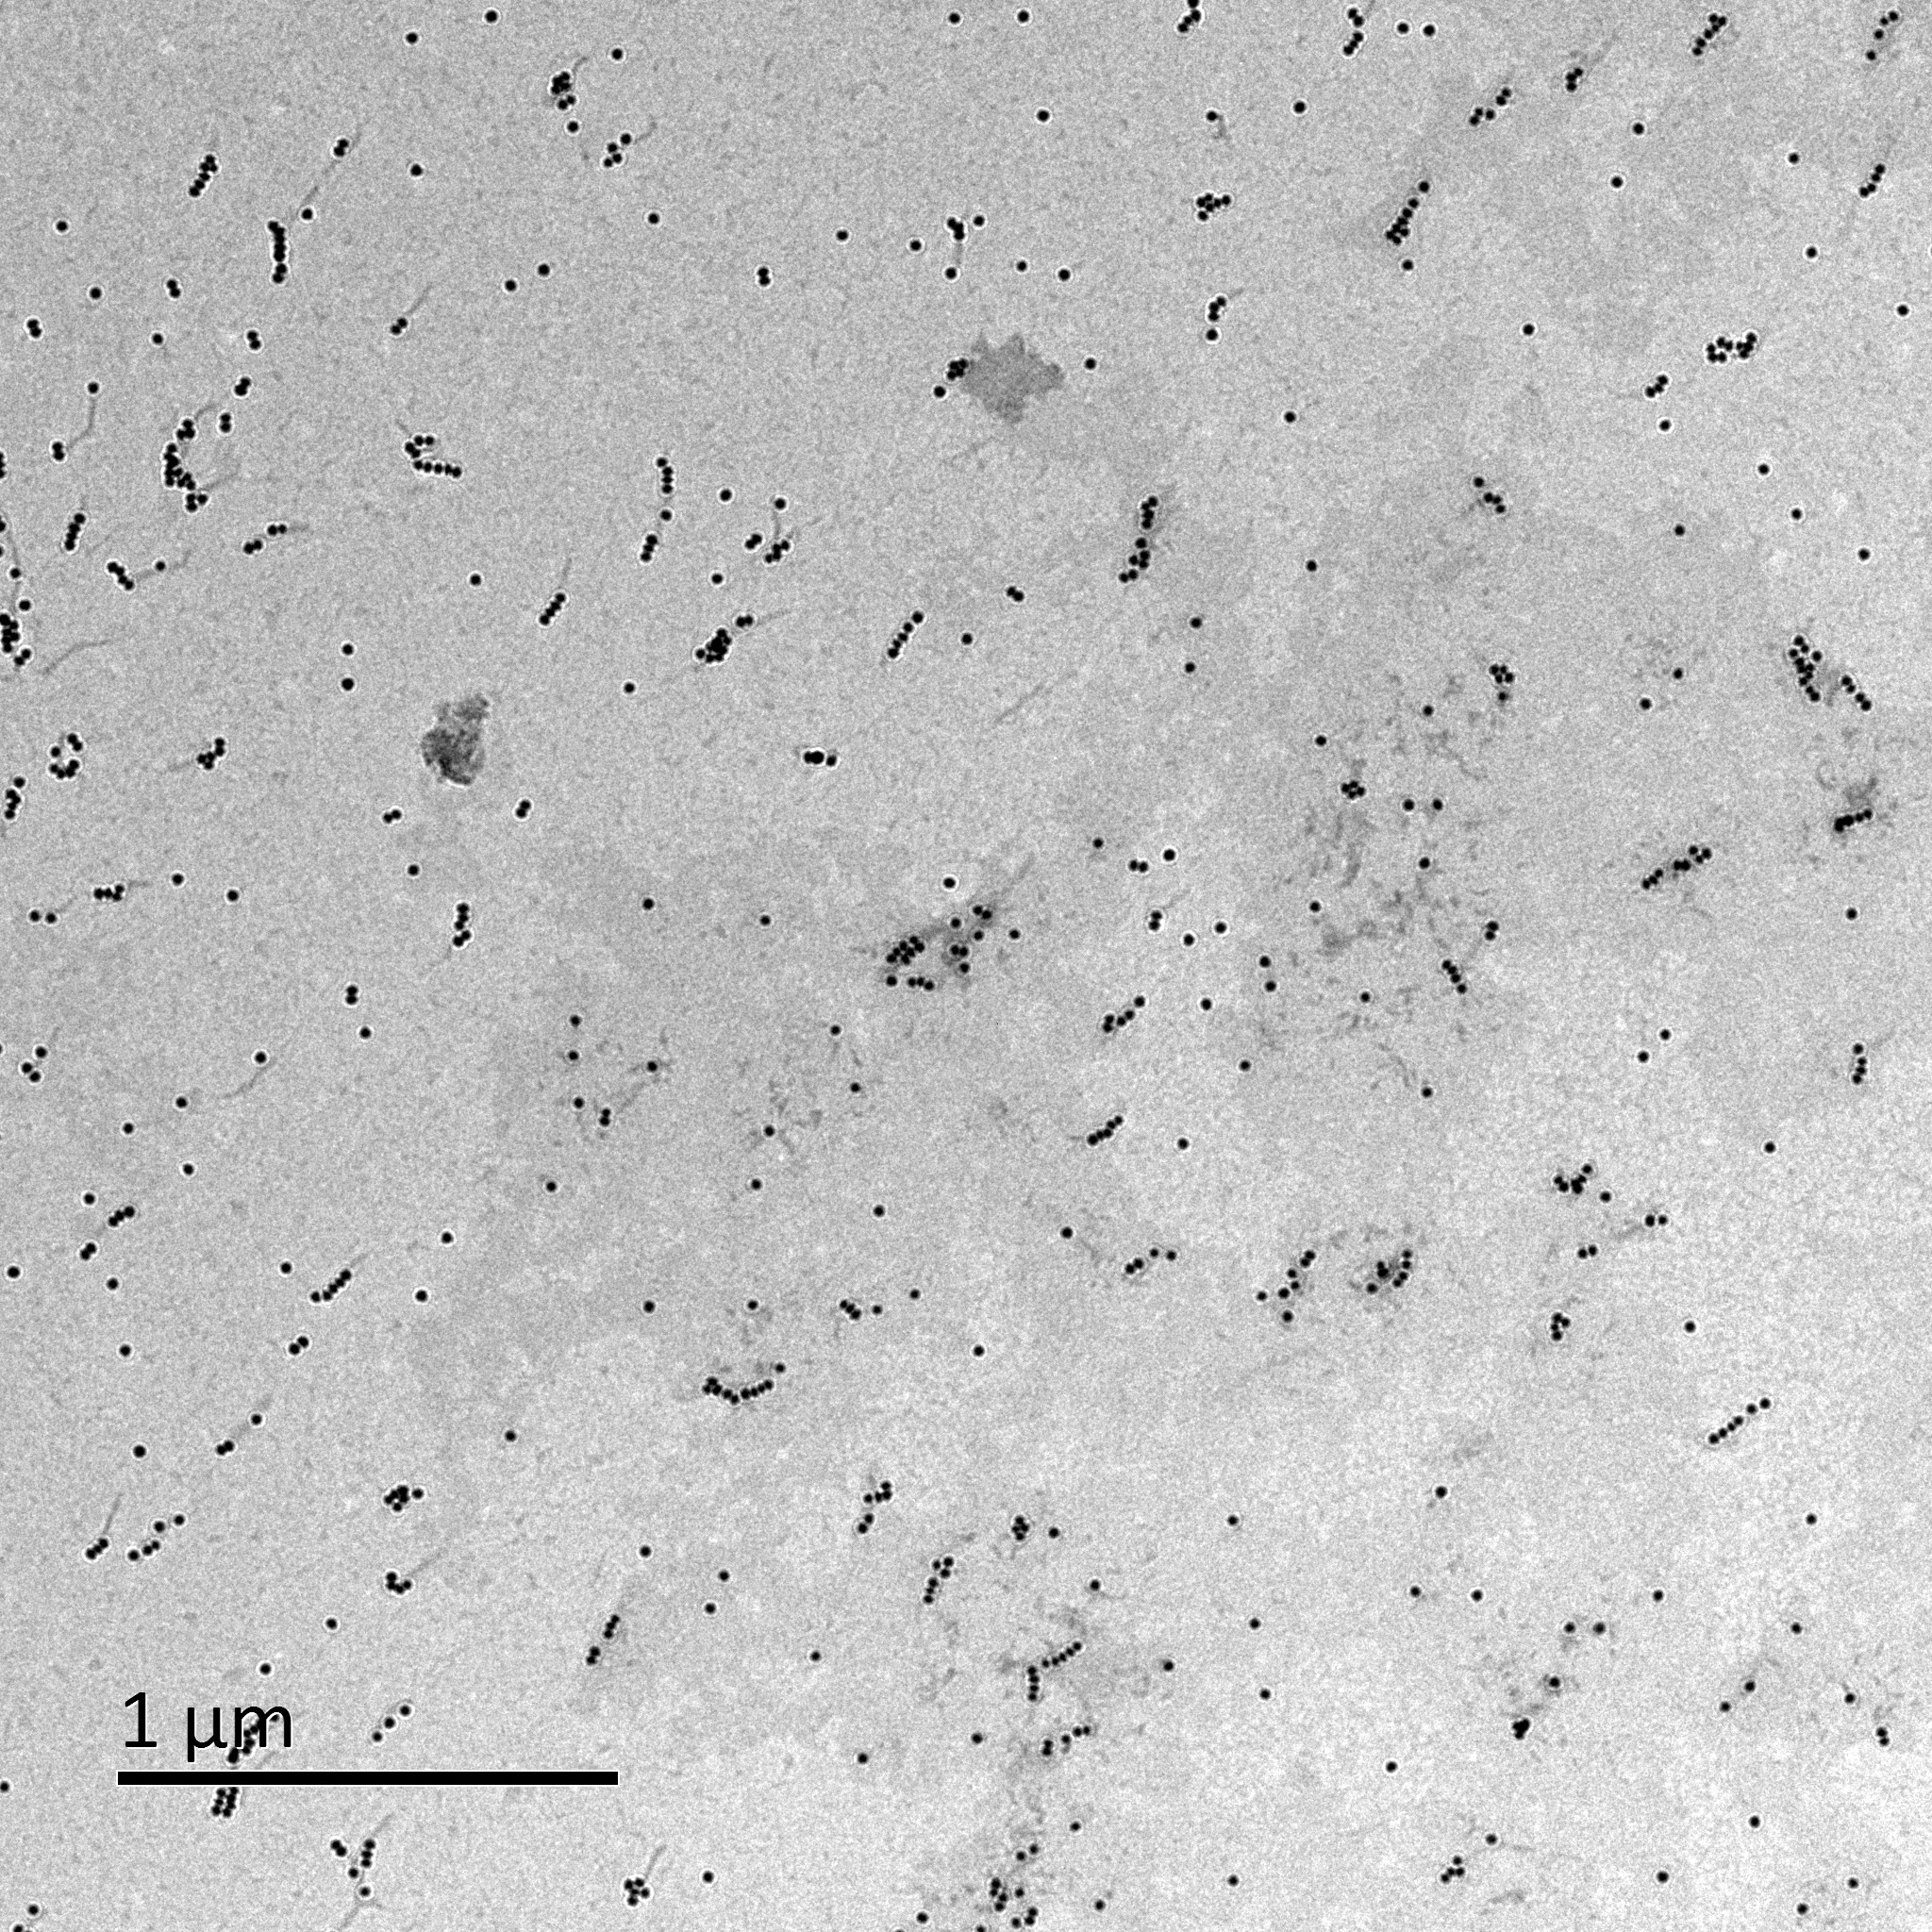

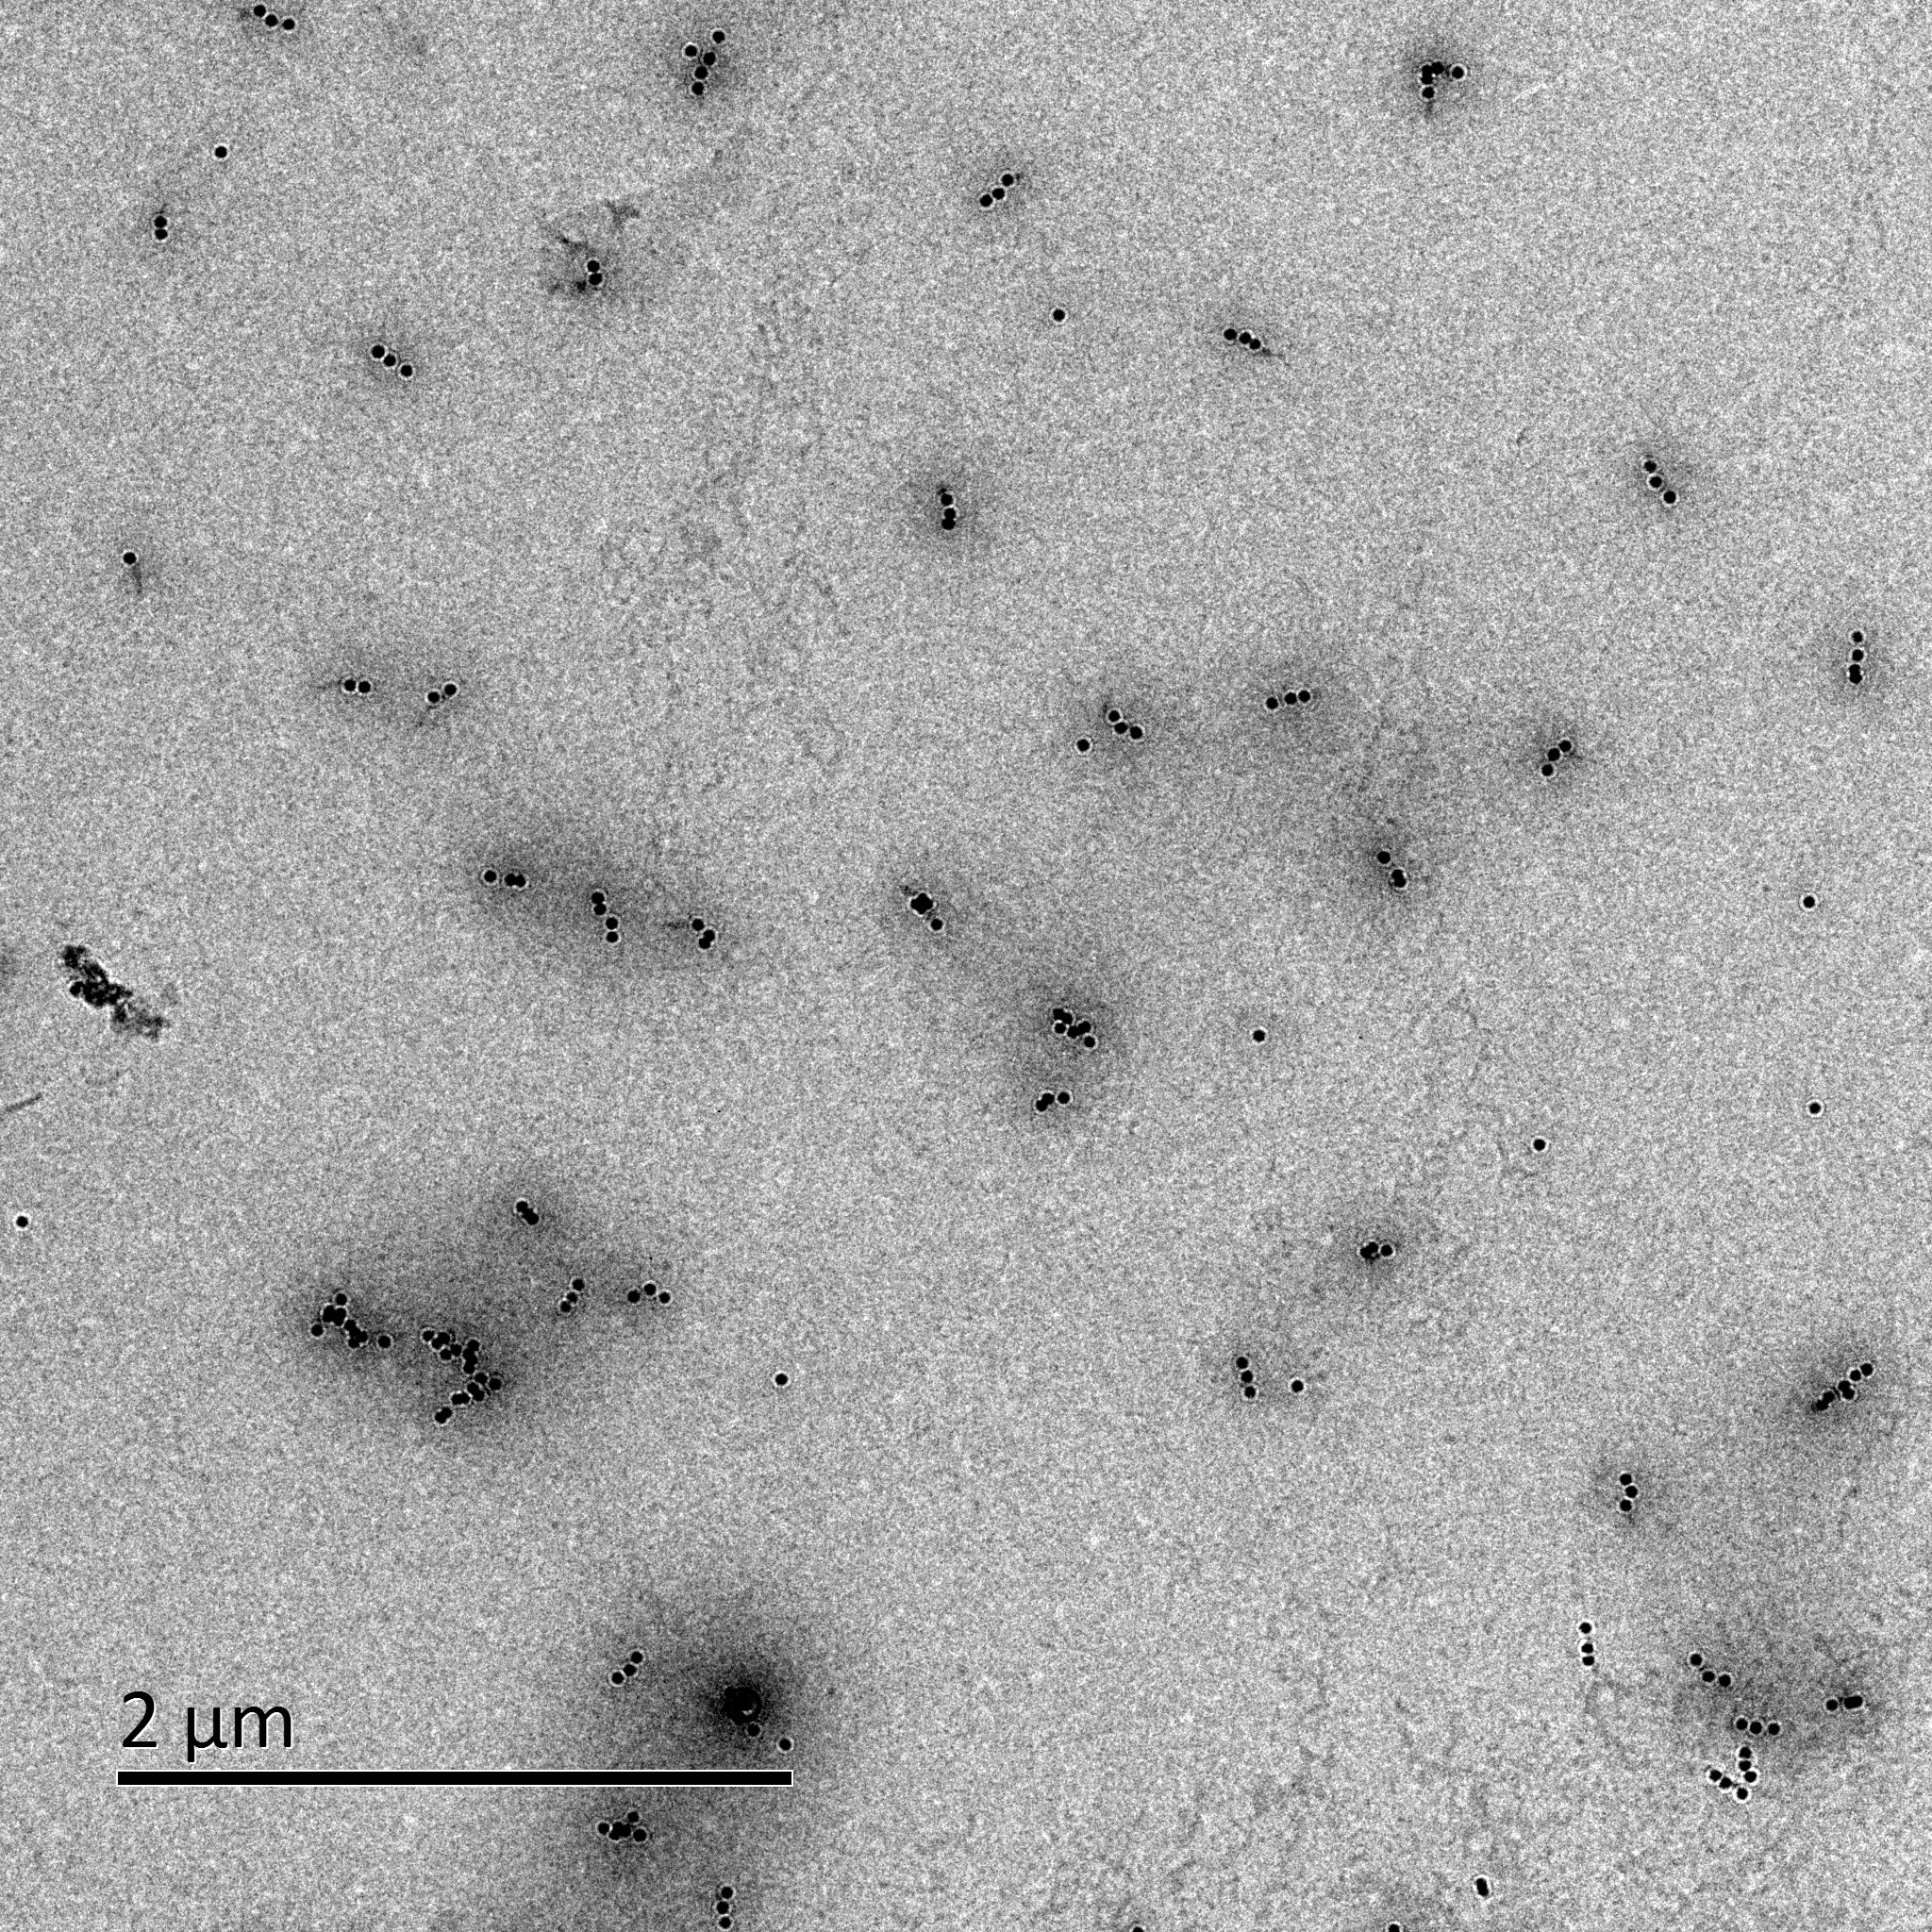

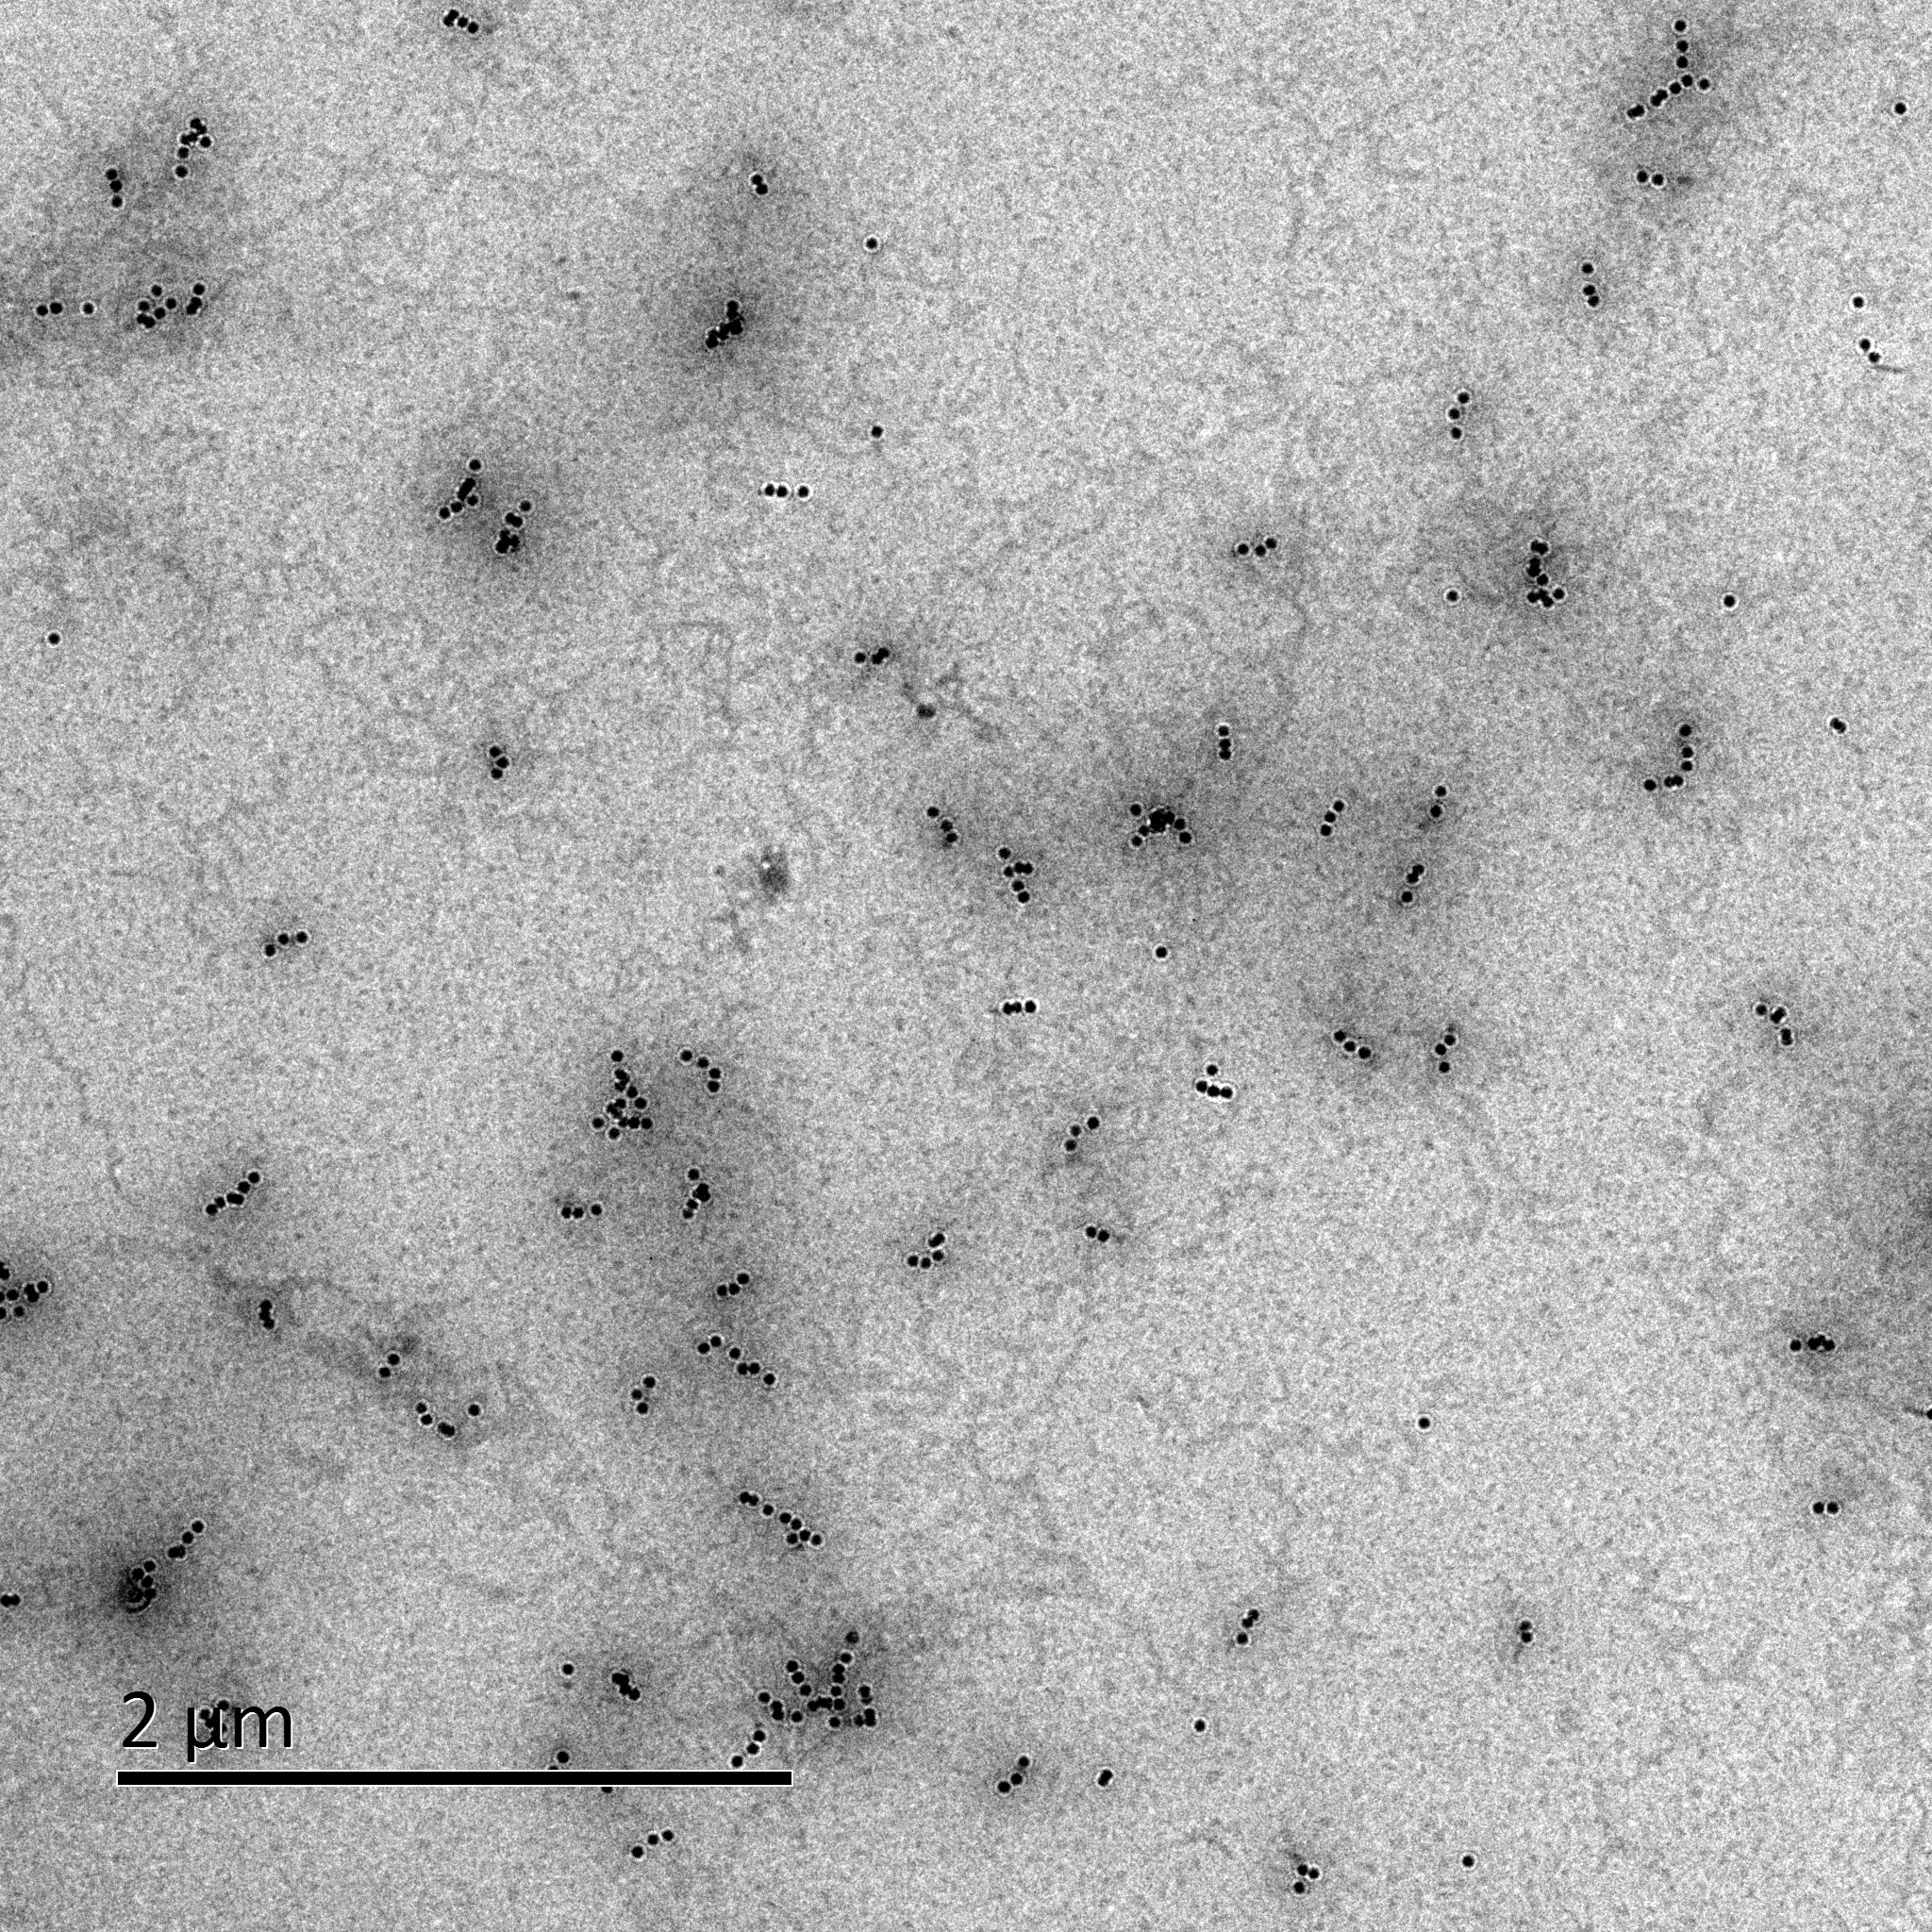

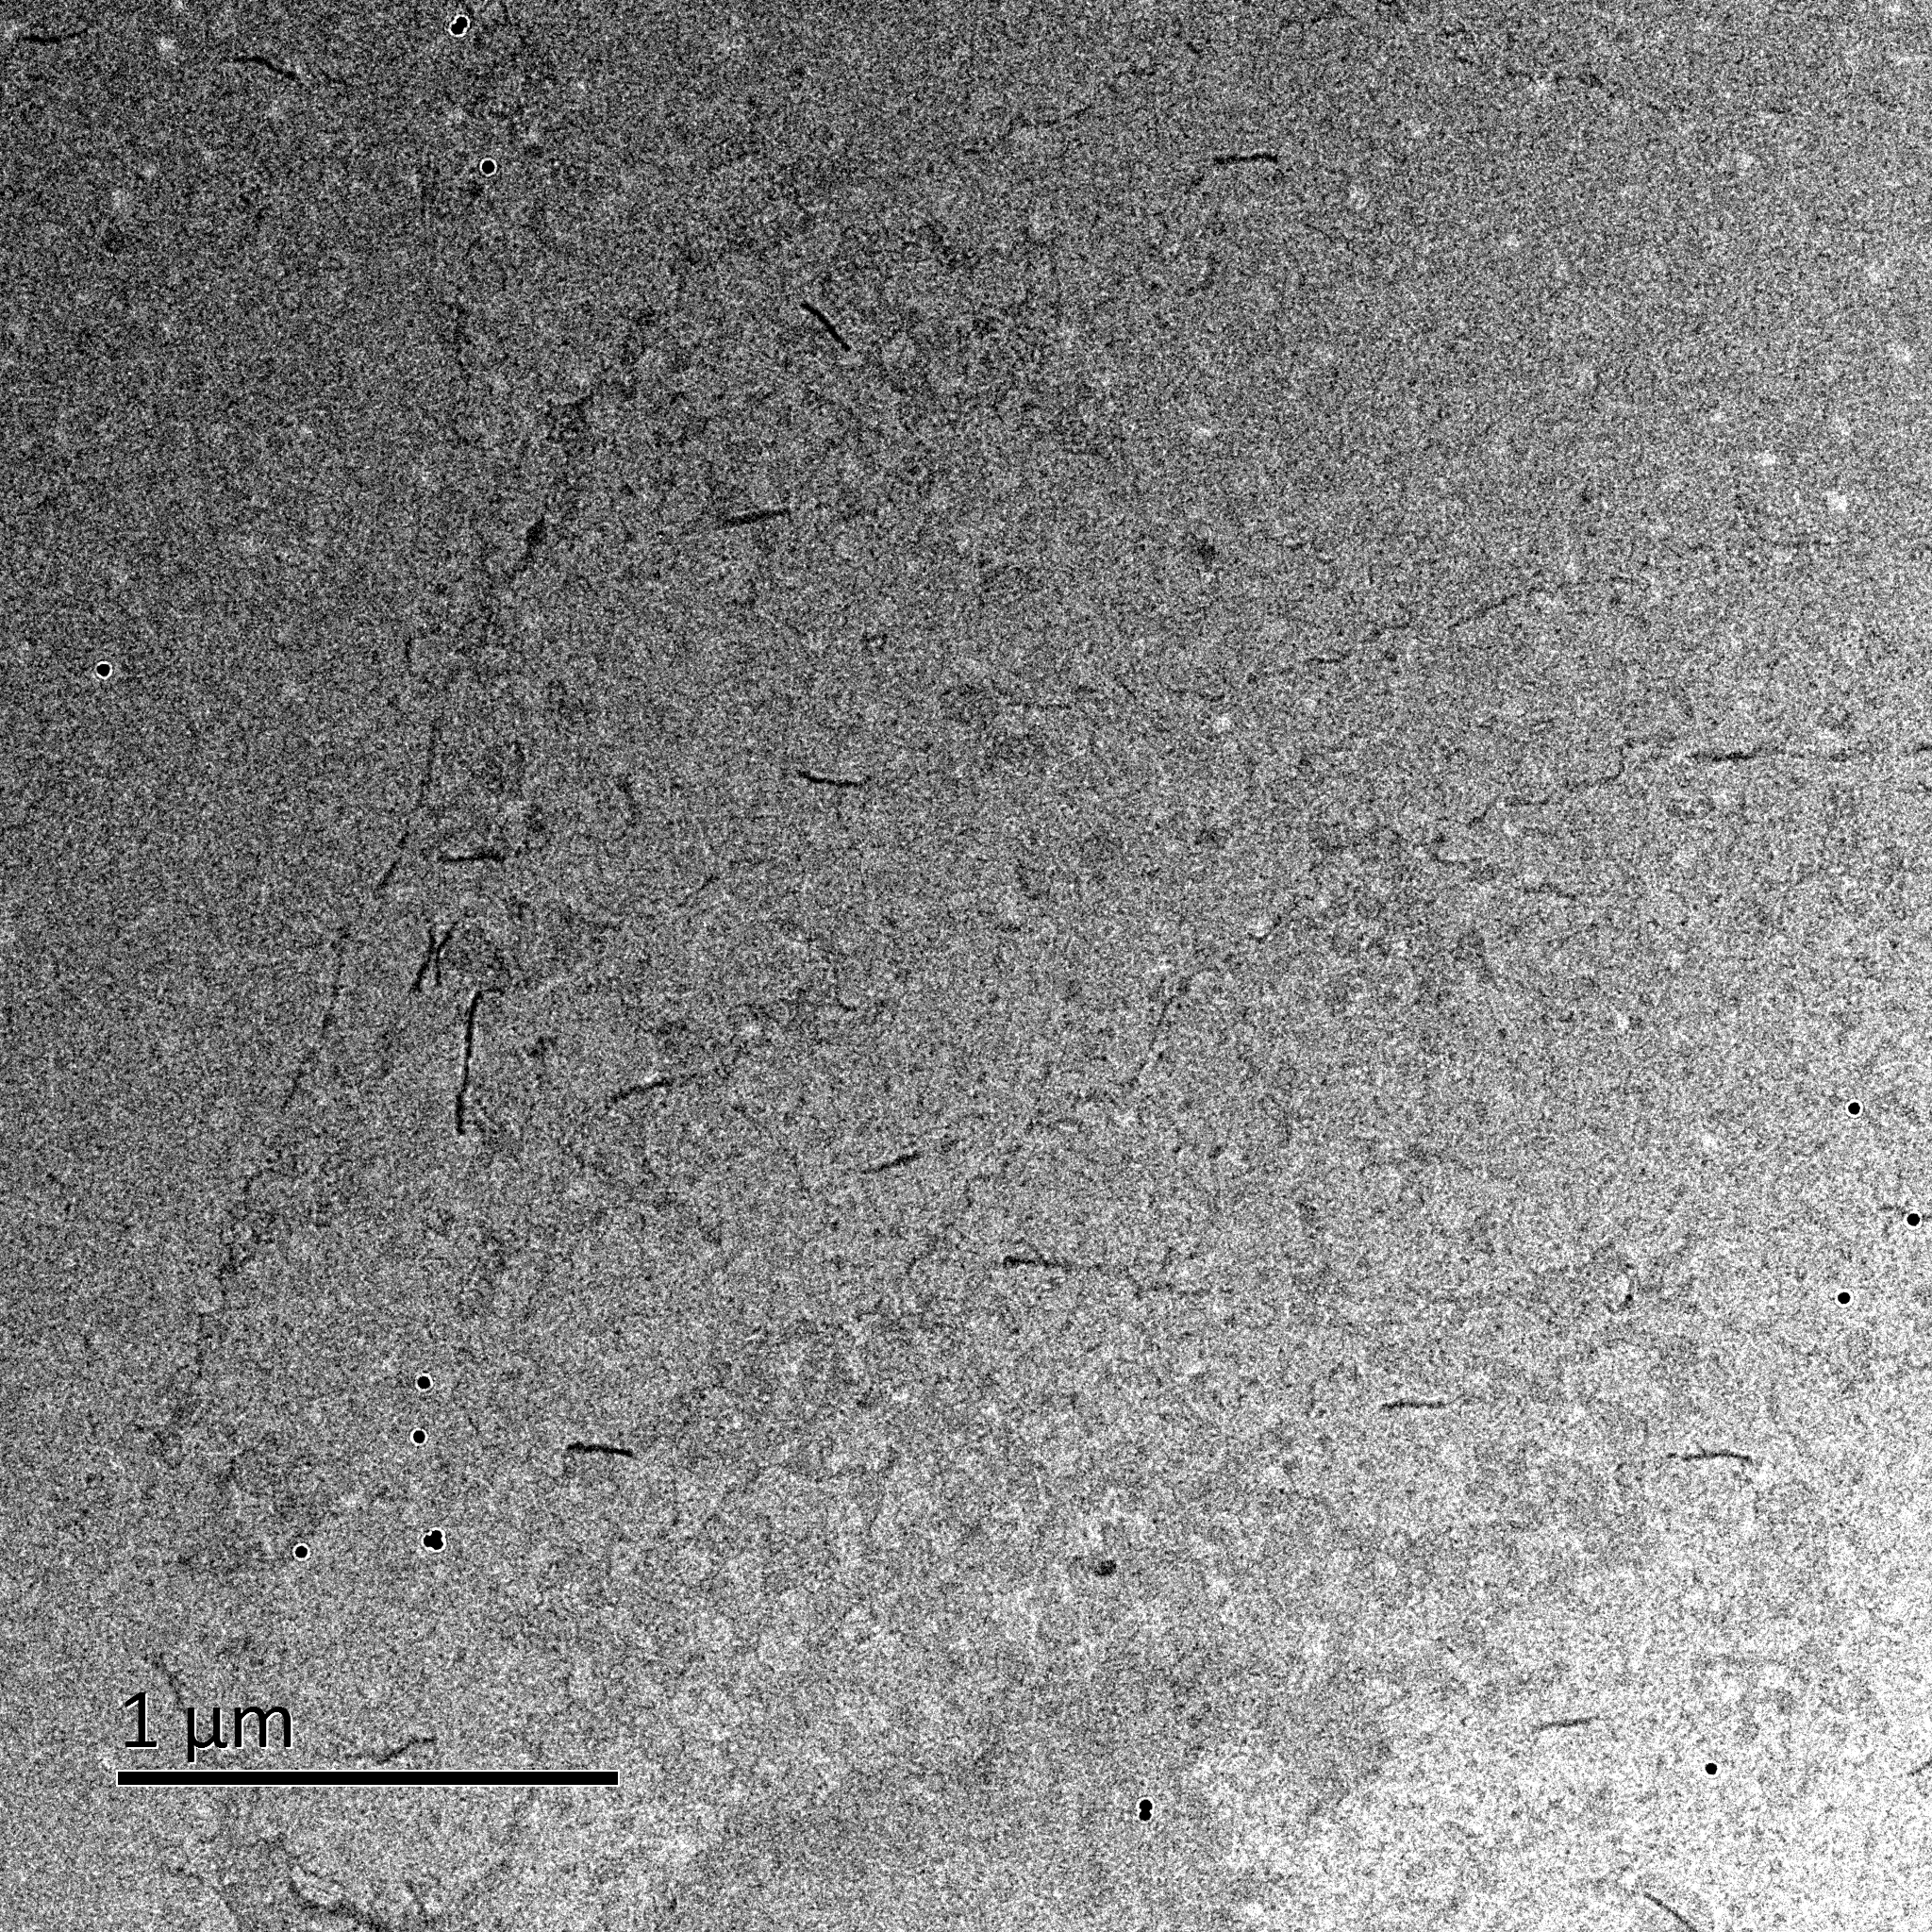
**(a) (b)**


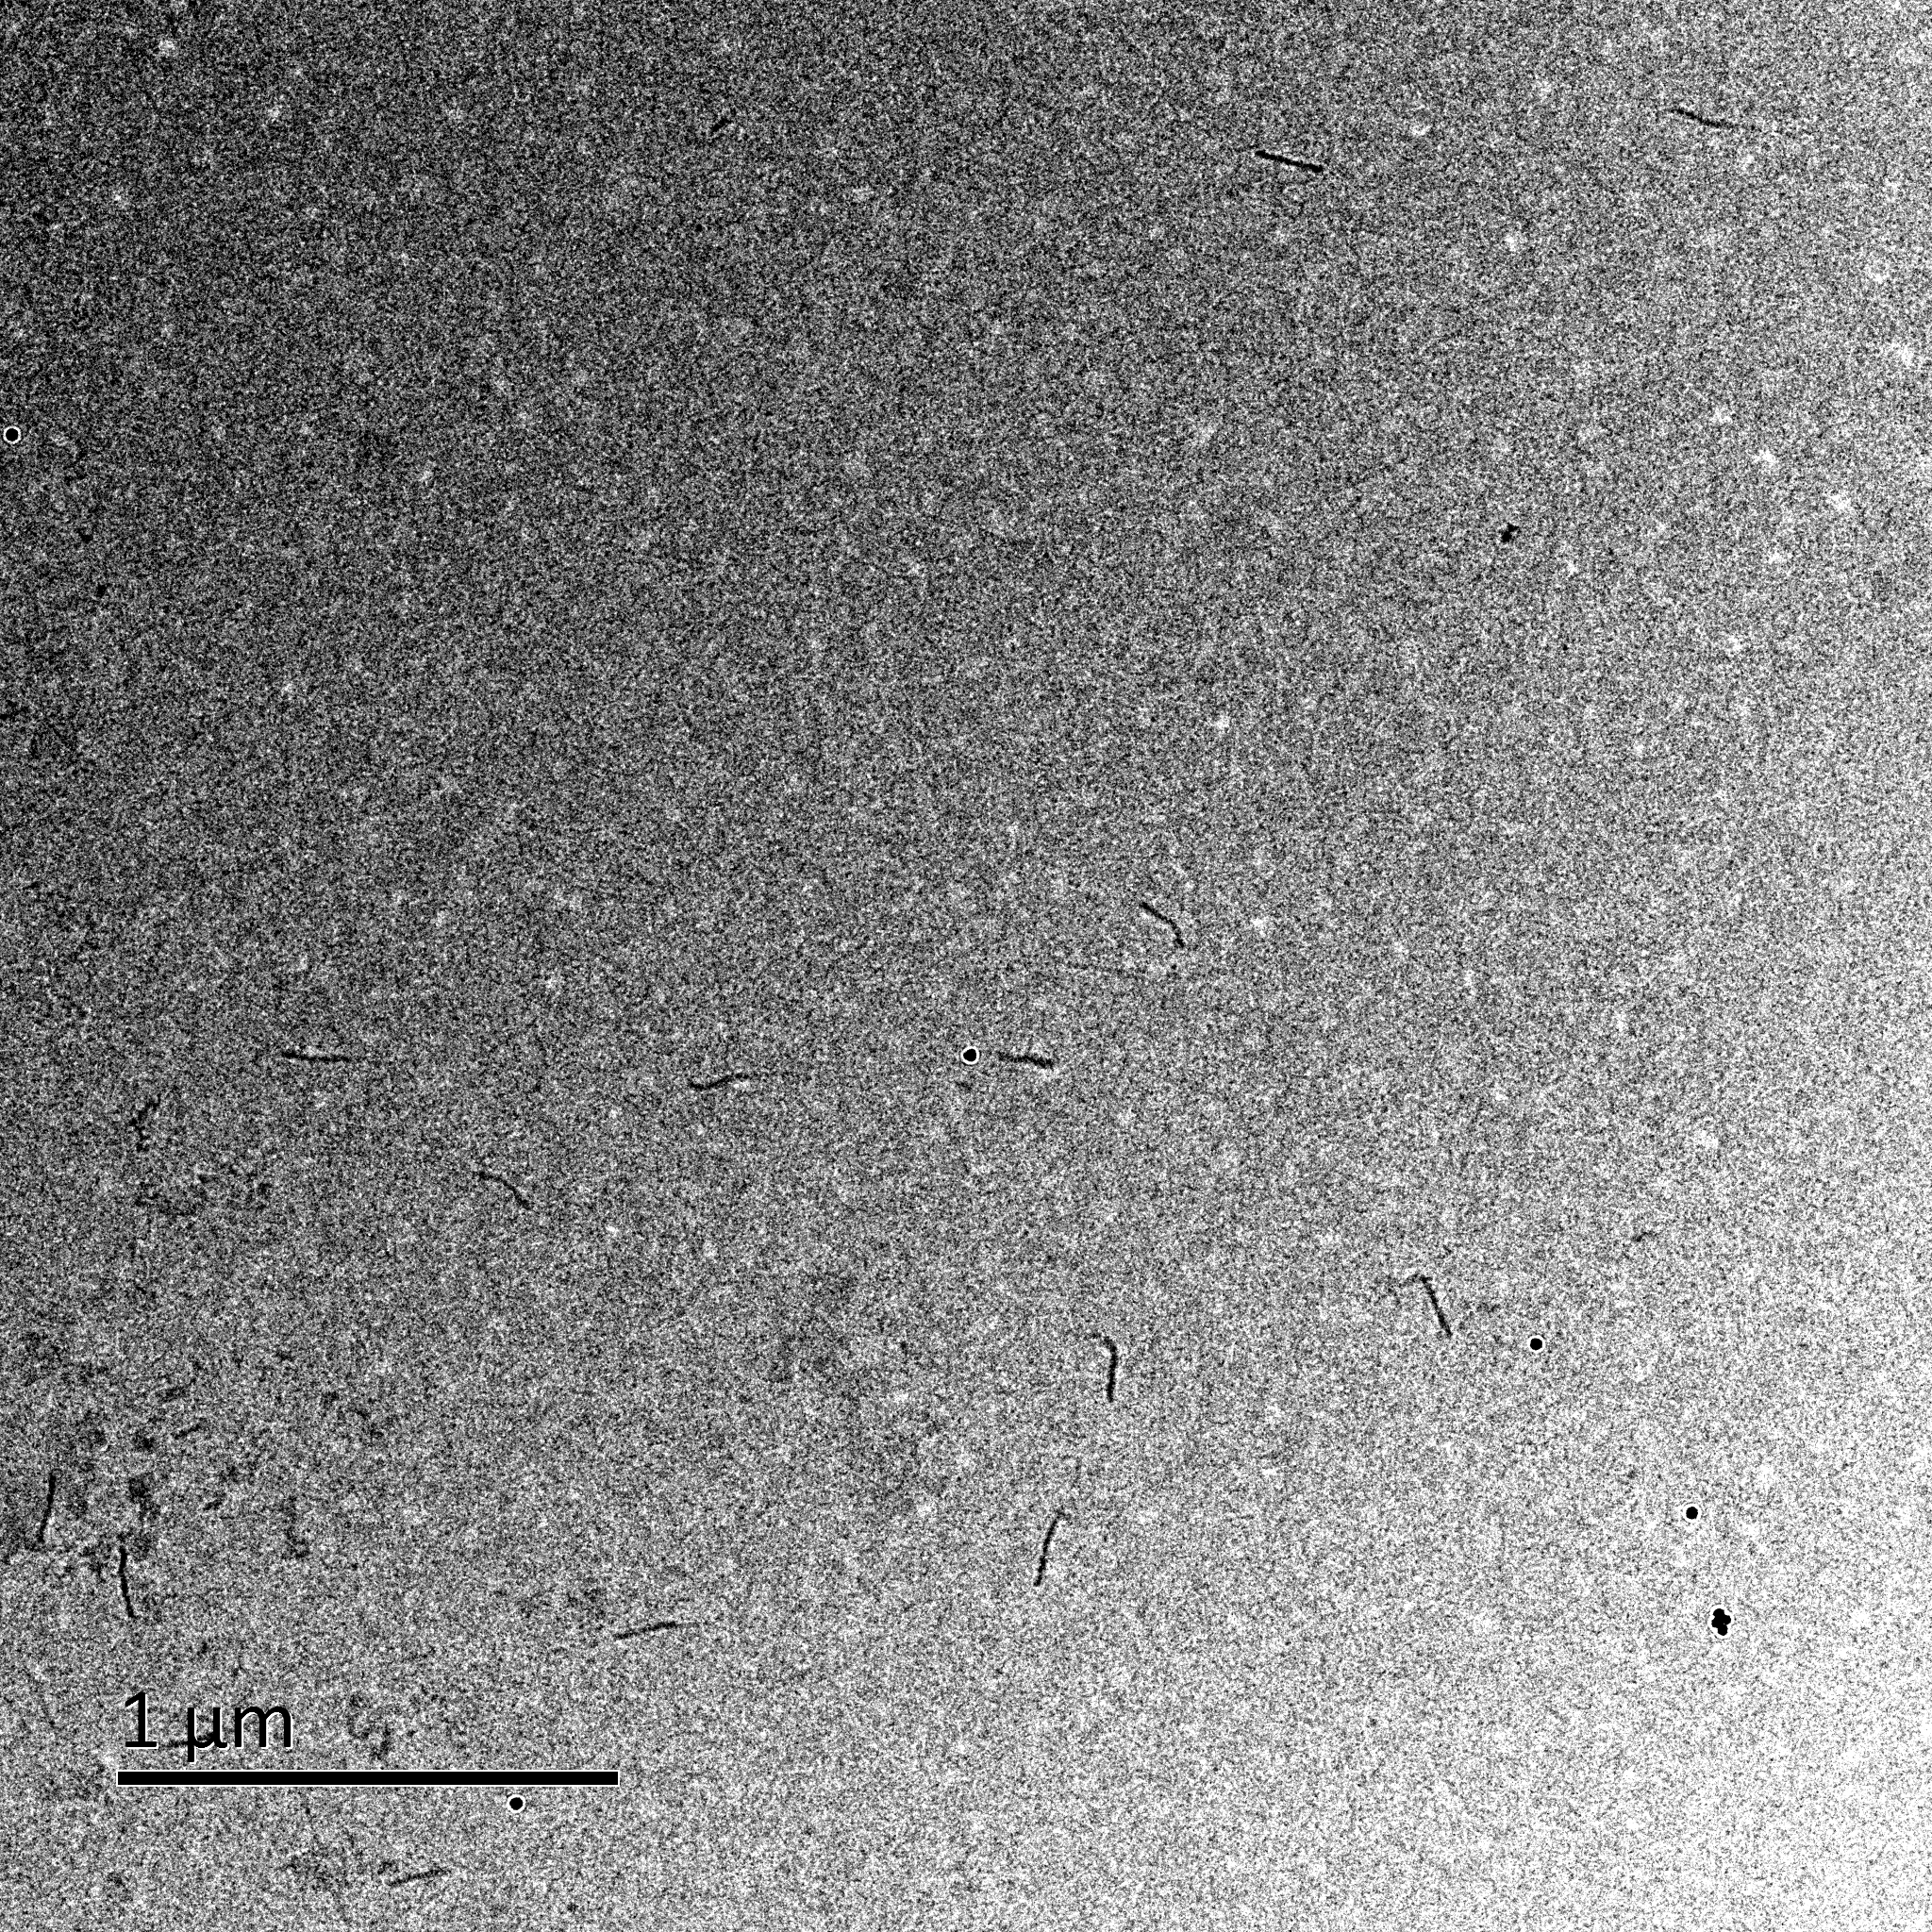

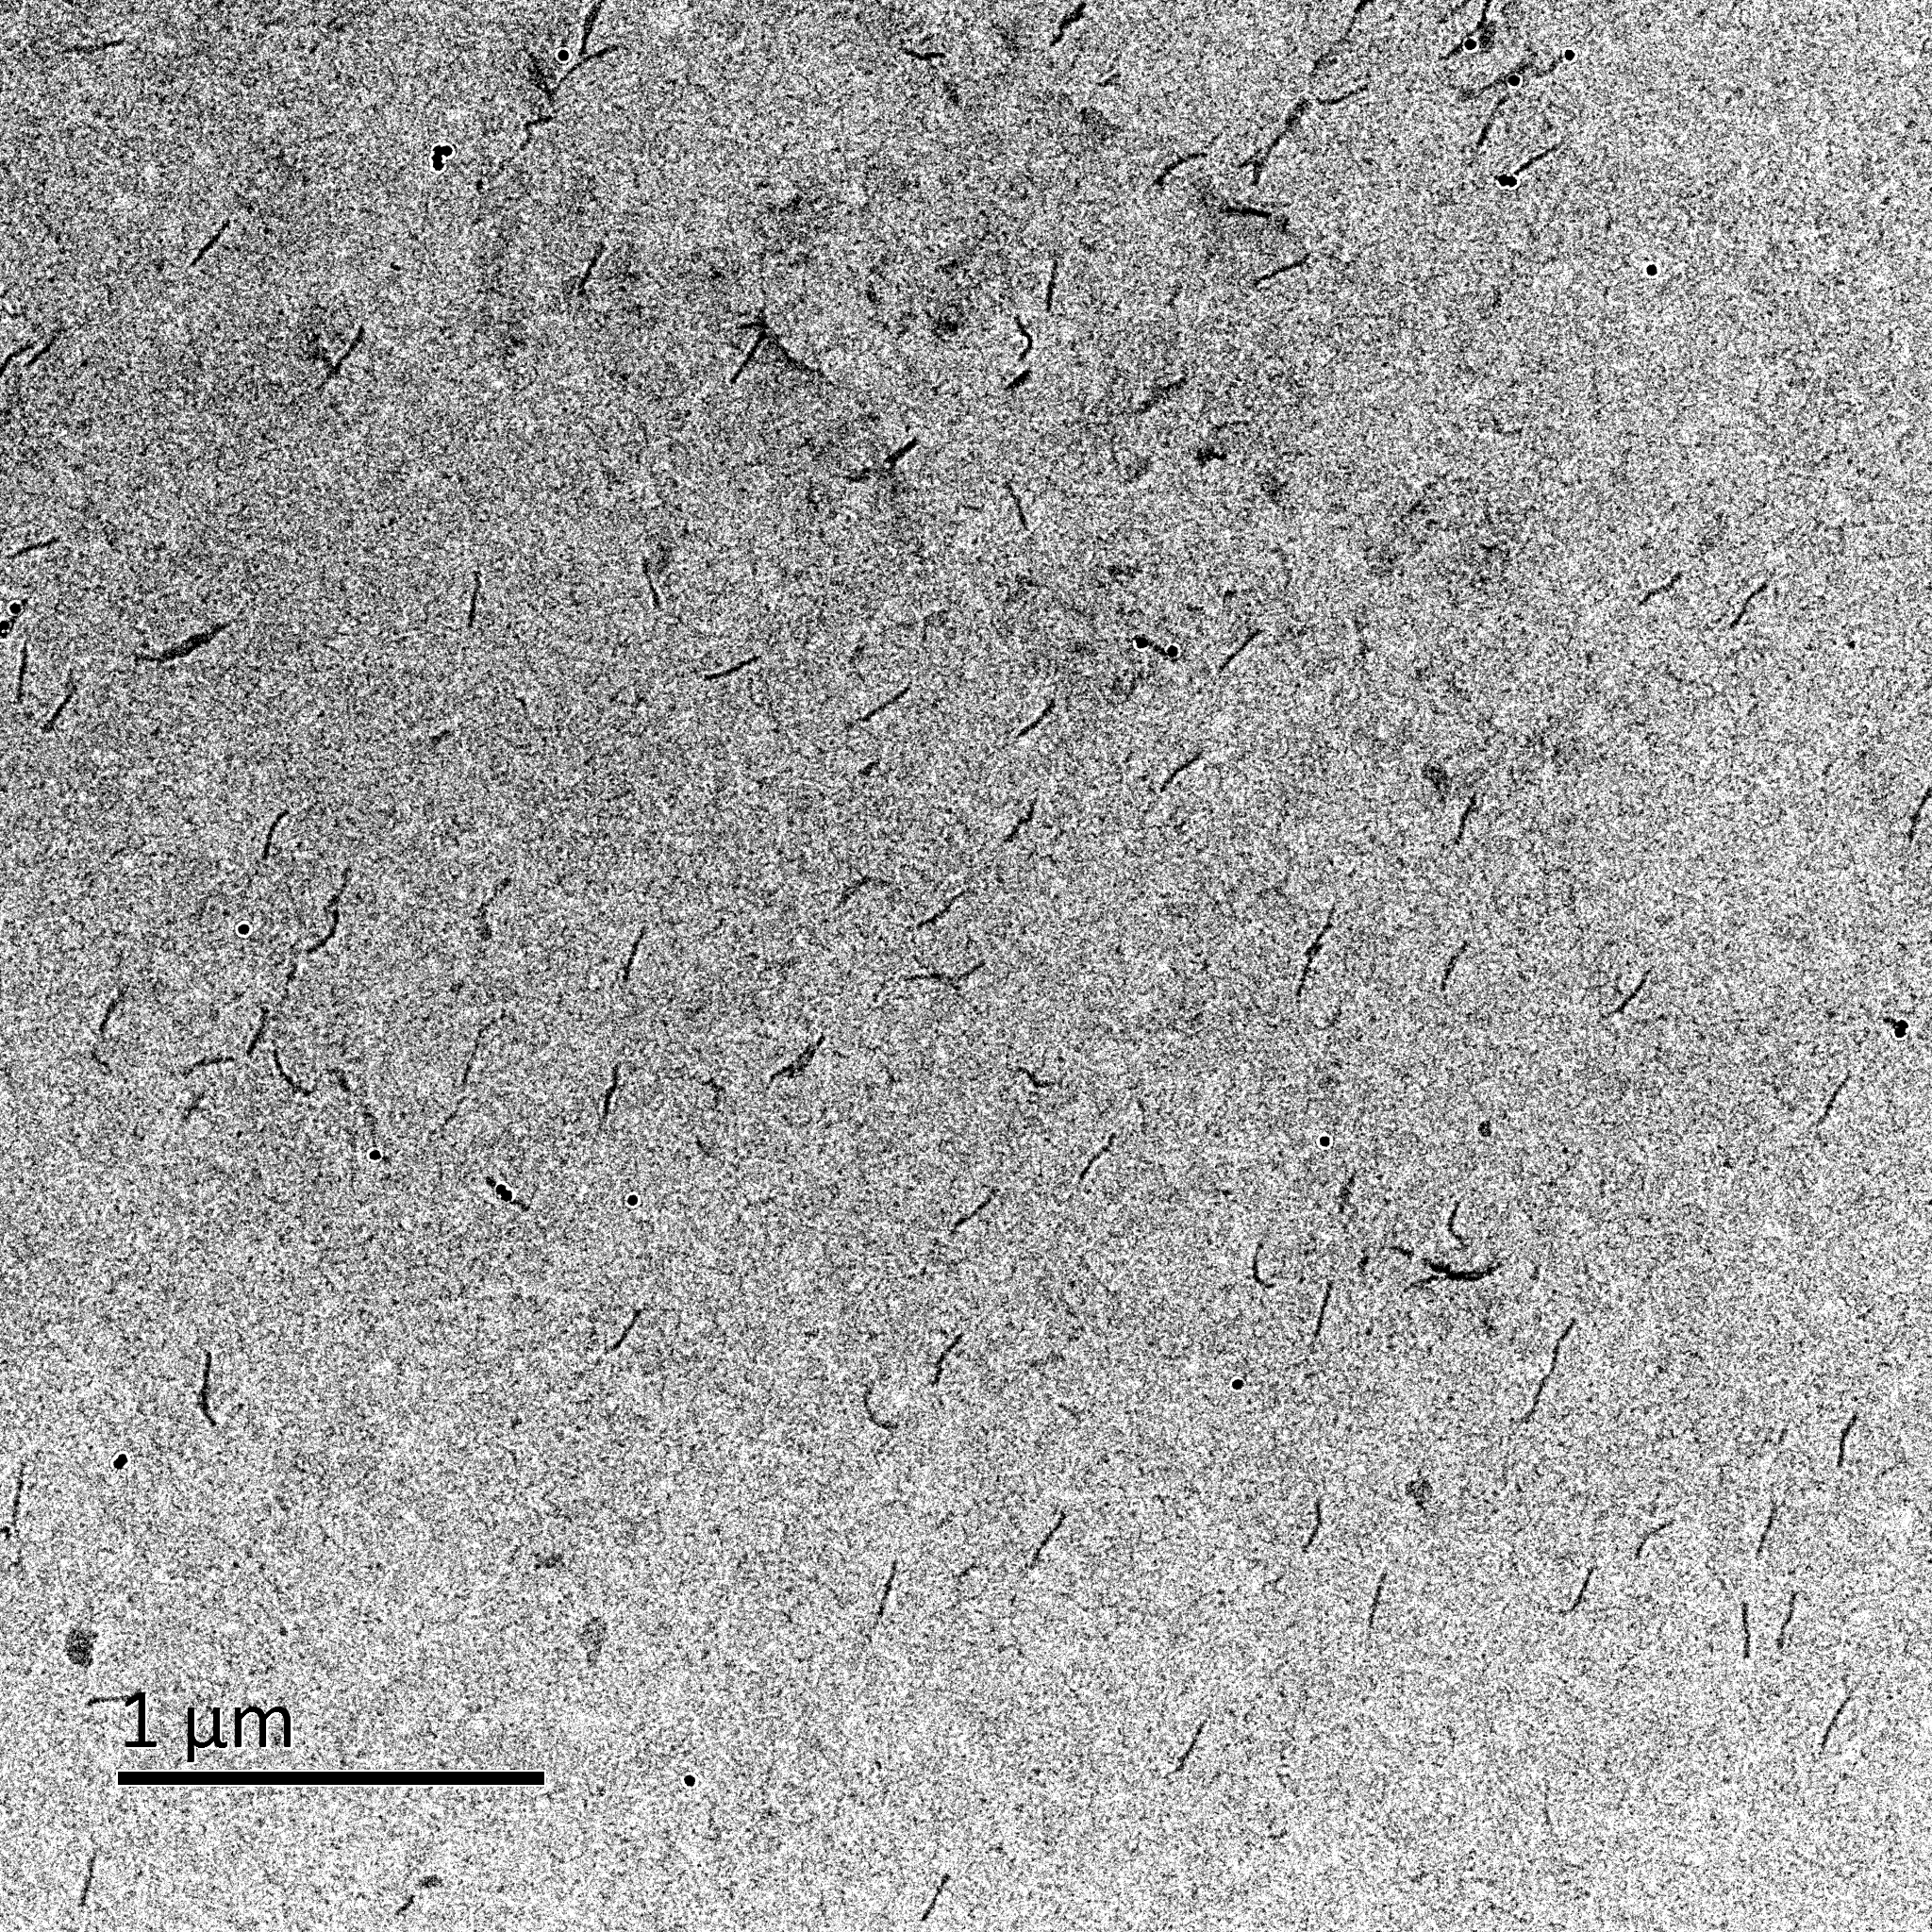
**(c) (d)**

**Figure S11.** Representational TEM images of OR gate. (a) INPUT: “00”; (b) INPUT: “10”; (c) INPUT: “01”; (d) INPUT: “11”.

**Table S1.** The statistical results of TEM images.

| **Logic Gate** | **INPUT** | **Number of gold particles bound on each Origami** | | | | | | | |  |
| --- | --- | --- | --- | --- | --- | --- | --- | --- | --- | --- |
| **0** | **1** | **2** | **3** | **4** | **5** | **6** | **>6** | **Sum** |
| **YES A** | **0** | 2 | 6 | 38 | 177 | 27 | 7 | 0 | 0 | 257 |
| **1** | 244 | 10 | 6 | 3 | 0 | 0 | 0 | 0 | 263 |
| **YES B** | **0** | 2 | 3 | 21 | 158 | 12 | 3 | 0 | 0 | 199 |
| **1** | 176 | 11 | 3 | 0 | 0 | 0 | 0 | 0 | 190 |
| **AND** | **00** | 1 | 4 | 4 | 29 | 70 | 96 | 52 | 40 | 296 |
| **01** | 0 | 5 | 20 | 131 | 12 | 1 | 2 | 1 | 172 |
| **10** | 1 | 0 | 17 | 80 | 8 | 1 | 2 | 0 | 109 |
| **11** | 214 | 6 | 2 | 2 | 1 | 0 | 0 | 0 | 225 |
| **OR** | **00** | 0 | 1 | 15 | 124 | 15 | 4 | 2 | 0 | 161 |
| **01** | 144 | 1 | 3 | 2 | 0 | 0 | 0 | 0 | 150 |
| **10** | 147 | 3 | 3 | 0 | 0 | 0 | 0 | 0 | 153 |
| **11** | 133 | 4 | 1 | 2 | 0 | 0 | 0 | 0 | 140 |

**Table S2.** The sequences of TL’s staples.

| **Name** | **Sequences (from 5′ to 3′)** |
| --- | --- |
| **2L-1** | AAAGACTAGATACAAAGATTCTATCATCCCCAGCG |
| **2L-2** | TTATCAGATGATGGCAATTCATCAATATAATCCTGATTGTTTGGATTAT |
| **2L-3** | CAGTTTGGAACAAGGTTTGCCACAATTCCACACAATAAAACG |
| **2L-4** | CGGAACAAAGAAACCACCAGAAGGAGCGGAATTATCATCATATTCCTGA |
| **2L-5** | CCTAAAACTTAGCCCAGTCACACAACCC |
| **2L-6** | AACGGAATATCACCTCGATAGCAGCACC |
| **2L-7** | GAATGACTTAATTGGGCAAGGCAAAGAA |
| **2L-8** | TCAAGAGACGAGTAGTAAATTGCGTCCAGAGCAAATATCAGG |
| **2L-9** | CATAAATAAAATAGTGGCTCAGGGAACCGGGTAAA |
| **2L-10** | AGGATTTTTTTTGTGATTAGCCGCCTCC |
| **2L-11** | AATGTGTTTTTGTTTTTCATCGTGCCAATCCGCTC |
| **2L-12** | TTTCCTTATCATTCCAAGAACGGGTATTAAACCAAGTACCGCACTCATC |
| **2L-13** | AAAAGATATTACGAAACAACAGTCGAAACTAAAAC |
| **2L-14** | ACTTCTGAATAATGGAAGGGTTAGAACCTACCATATCAAAATTATTTGC |
| **2L-15** | ATTTTCGAGCCAGTAATAAGAGAATATAAAGTACCGACAAAAGGTAAAG |
| **2L-16** | CTAGCTGTCATACACTGAATATAATGCT |
| **2L-17** | AAGAAAACAAAATTAATTACATTTAACAATTTCATTTGAATTACCTTTT |
| **2L-18** | CTCATTAAACGAGTAATGGTCAATAACCTACCGAAGCCCAATACTCCAG |
| **2L-19** | GCGCCAGGGTGGTTCCCAAATCTAAAGA |
| **2L-20** | ATATTCACATAGCACCATTACCATTAGC |
| **2L-21** | ATCCGTTCCAGTAACACCAGATAATCTTAAAGACA |
| **2L-22** | TCACCGGCGGATAACGGAATATAATAAT |
| **2L-23** | TTAATGCGCCGCTAATTTTAGGACATTCTGGCCAAATACCGA |
| **2L-24** | ATAAATTTCATATGTCACGTTTGGCGAAAATTGCG |
| **2L-25** | TCCACAGGTACAAACTACAACTAAGTTTGAGAGATCAGATAGCCGAACA |
| **2L-26** | TTTAAACGTAGCTCTAACATCCAATAAA |
| **2L-27** | AAGCCAGTTTTGATAAGGCTTATTCATTGGATCGT |
| **2L-28** | ATAGTCAGCTCCTTAGCATAAAGCTAAA |
| **2L-29** | GGGTTATATAACTATATGTAAATGCTGATGCAAATCCAATCGCAAGACAAAGAACG |
| **2L-30** | ACCGCCTGATTATTCAGTGAGGCCACCGCTGGCAATGACAAC |
| **2L-31** | TATACAAATTCTTACCAGTATAAAGCCAACGCTCAACAGTAGGGCTTAA |
| **2L-32** | AGCAGCGGACAAGACATTCGCCTCAGGA |
| **2L-33** | AAAGGAATAACTGATTAATGCCGCCGCC |
| **2L-34** | AGCGGTCCACGCTGAGTCCACGGCAAAA |
| **2L-35** | AGAGGCTACCAGGCGTGCGGGACCGTGC |
| **2L-36** | CAGGTCAAAGGCCGGGAATTAGAGCCAGAAGTTACGAGCGCTAATCAAT |
| **2L-37** | AAATTGTTTATTACAGGTAGATAACGCCGCATTAATGCAATG |
| **2L-38** | TCAAAATCATAGGTCTGAGAGACTACCTTTTTAACCTCCGGCTTAGGTT |
| **2L-39** | AACAACTCTCCAAAAGCACGTATAACGT |
| **2L-40** | TCATTGCGGGGCGCTTCATTCCATATAA |
| **2L-41** | AACGAGGACCTTCAAACTGTTGGGGACGACGACAGGAGTCTG |
| **2L-42** | TTTAATTTGAGAATCATCGCCACATTTG |
| **2L-43** | CGTCAATGAAAATAACTCCTCCCTCAGA |
| **2L-44** | GCTTGCTCTTTCAAACGAACCTTAGAGC |
| **2L-45** | ATTCGCGTTAAATCCTAATGCTCAAATATCGCGTTCTTCAAACCTTTAT |
| **2L-46** | AACCATCAAAGTTTTGCCACGACAGTTG |
| **2L-47** | ATGGGCGAACTAGCCAGAGGGCAAATGC |
| **2L-48** | TAAATGATCATTTTCAGGGATCTATTTCTTAGACGAAGAACT |
| **2L-49** | CGCGAGGCGTTTTAGCGAACCTCCCGACTTGCGGGAGGTTTTGAAGCCT |
| **2L-50** | GAGAGGCGGTTTGCTCGAGGTCGGCTAC |
| **2L-51** | ACACCGGAATCATAATTACTAGAAAAAGCCTGTTTAGTATCATATGCGT |
| **2L-52** | AGATCGCAATAAGAACATGGCAATGGAA |
| **2L-53** | TTGAGAATCGCCATATTTAACAACGCCAACATGTAATTTAGGCAGAGGC |
| **2L-54** | TTGCCCGAACGTTATTAATTTTAAAAGTTTGAGTAACATTATCATTTTG |
| **2L-55** | TGCATCAGATTAGATACCAAAAACATTA |
| **2L-56** | CCAGCAGGCGAAAAGTTGTTCACTCATC |
| **2L-57** | ATTATTCATTTCAATTACCTGAGCAAAAGAAGATGATGAAACAAACATC |
| **2L-58** | GCTGATTGCCCTTCAAAACCGATACGTA |
| **2L-59** | TTAGAGCTTGACGGACATCACAATATTA |
| **2L-60** | GAGCCGCATTATTCACCACCCATTTTCTAGCTTGA |
| **2L-61** | GATATTCATCAGAAGATTGACCAAGGCGATGAGTG |
| **2L-62** | CAAAGACTAGAAAATTTGCCATCTTTTC |
| **2L-63** | ACAGGAGGCCCGTATGTACCGACGATCTGCCCACG |
| **2L-64** | ATAGCGATAGCTTAGATTAAGACGCTGAGAAGAGTCAATAGTGAATTTA |
| **2L-65** | ATCTGCCATCGATGGTTTAGAAAATATT |
| **2L-66** | TGATAGCCTGAAAGCAGAGCGGGAGCTATTTGACGAGGAGCC |
| **2L-67** | ATCATAATTATACCAGTCAGGCGACGATAAAAACAATCACCA |
| **2L-68** | GAGAGGGGTAGCATAACATGTTTTAAAT |
| **2L-69** | AGATAGGGTTGAGTTCCTGTTGTGTGAAATTGTTAGCTTGCA |
| **2L-70** | TGGTTTGAAATACCGACCGTGTGATAAATAAGGCGTTAAATAAGAATAA |
| **2L-71** | GTCGGATTGTATAACCTCGTTGACTATT |
| **2L-72** | TTTTGCGACCCAAAGCCGGAACCAGCTT |
| **2L-73** | ACCCTCAAAGTTTGTAAATATTGACGGATTAAGACAACAGGGATCTTTA |
| **2L-74** | CGGCGAACGTGGCGATACTTCAACAGGAAAAACGCAAAGCAT |
| **2L-75** | GGTGAGGCACCAGTCCTGAGAAGTGTTTCTGCGCGTACCGAT |
| **2L-76** | TCATATAGGAGAAGGCGAACCAGACCGG |
| **2L-77** | AAACCGACCATTTGGAAACGTCACCAAT |
| **2L-78** | TTACAAACCAATCCTACCAGGAACCAGA |
| **2L-79** | TAACAACGAGAATATGAAAGTAGCCACC |
| **2L-80** | CAATCAAACCACGGATTTATCCAATTCGATTAGTCGCACAGA |
| **2L-81** | CCAACTTGCGATTTTAAGAACCGAGAGGGTTGATAAACCGTT |
| **2L-82** | TGAAAATCTCCAAAAAAAAGGAAAGGAACGCGAACTTAGACT |
| **2L-83** | AATGTGATGTAAACTAAGAGCAGCGGAT |
| **2L-84** | GAATACATCCGCGAACGGCCAAACATTA |
| **2L-85** | GATGAATATACAGTAACAGTACCTTTTACATCGGGAGAAACAATAACGG |
| **2L-86** | TCCCCCTGGTAATACAACTTTTGTACAGTTGAGGA |
| **2L-87** | GGATAGGTACCCCGCTTTTGCAAAACGA |
| **2L-88** | ACCAGGCCCAGAACTTGCCTGAGTAGAACCCCGATCACCCTC |
| **2L-89** | TACGCAGGGGAAGGCCTTTAGCGTCAGA |
| **2L-90** | TTACCCTTACCAGAACGTTGGGGCGCAGTACGAAG |
| **2L-91** | GTGTAGCGGTCACGTTATAATTACATTGGCAGATTCGGTCAG |
| **2L-92** | TTAAGAATTTCGCAAGATTTAGTTTGACCAAACAACTGGTAAGCAGCTG |
| **2L-93** | GAGAACAAGCAAGCCGTTTTTATTTTCATCGTAGGAATCATTACCGCGC |
| **2L-94** | TCGTCATCTGGATAGGGCTTGCTGGCTGGTAGCAA |
| **2L-95** | GCAGCCTGCAAACGTAGAAAAGACATTCGCGTTTTCATCGGC |
| **2L-96** | TCAATATTTAGCAAGGATGGCTTAGAGC |
| **2L-97** | TTGCAGGGTAGCATCACCTTGCTGAAGC |
| **2L-98** | TAATTCTGTCCAGACGACGACAATAAACAACATGTTCAGCTAATGCAGA |
| **2L-99** | TTTTAAAATTTTTGTCTGGCCAGGTCGAGTTTCCT |
| **2L-100** | GGCATGAAATTATTGTAGCGACAGAATC |
| **2L-101** | CAAGCGCACAACGGGGATCCCAAAAATA |
| **2L-102** | AAGCCCGAAGCAAAGTAATACTTTTGCG |
| **2L-103** | TGATGGTGGTTCCGTAGCCCGATTATAC |
| **2L-104** | ACCCTAAAGGGAGCGAACTCAAACTATCGGCCAACAATCGGAGCATCGG |
| **2L-105** | TCTGTAAATCGTCGCTATTAATTAATTTTCCCTTAGAATCCTTGAAAAC |
| **2L-106** | TCTATCAGGGCGATGGCAACAAGCTAACTCACATTAGGGGGA |
| **2L-107** | CCAGAGCCCCCTGCAGCAAGCTTTCCAGCCGACAA |
| **2L-108** | CAAGTTTTTTGGGGGTATTGGCAGTCGGGAAACCTGCGATCG |
| **2L-109** | GATTCAATCGGTTGGAGTACCTTTAATT |
| **2L-110** | AGCATTGGAAACCAGTCACCGACTTGAGGGAAACGGAACAAACAAATCA |
| **2L-111** | CCCTCAGATTAAGAAGAACCGTAAACAATTCGAGG |
| **2L-112** | CCATTGCTTTGATTAGTAATAGGAAAGCAGGCCGC |
| **2L-113** | AGATCTAGCATCAATAAAGTACGGTGTC |
| **2L-114** | AGAAAGGGGTTTAGTACCGCCGGATTAGTTAACGTATAAAGG |
| **2L-115** | CTTAAACGTATGGGAAACAGAGGAGCAC |
| **2L-116** | AGTTGCGACGTTAGTATTAACAGGTTAT |
| **2L-117** | GATATATTCATAGTCAAATGAATCTGGT |
| **2L-118** | CTCAGAGATTTTCGAAAGACAAAAGGGCTACATACCAAAAATAGATAAT |
| **2L-119** | CAGGTCTTTTTTGCAATTAAGCAATAAA |
| **2L-120** | CAAAGGCCAAGAGAAGTTTGAGGGAAGGGTCGTGC |
| **2L-121** | CCGCCACAAGAGAAACCCTCAAGCGGAGGTATCGG |
| **2L-122** | ATTAAAACAGAGATGGCCGATTAAAGGGCAGGGCGTTTATCA |
| **2L-123** | AAAATCTTCATGGATAACCGTTGTAGCAAGAAAGGCTGAGGC |
| **2L-124** | CGAGAAAACTTTTTCAAATATATTTTAGTTAATTTCATCTTCTGACCTAAATTTAA |
| **2L-125** | AGCCAGCAAAATTCAAAAGGATAAGAGG |
| **2L-126** | ACGCGCCTGTTTATCAACAATAGATAAGTCCTGAACAAGAAAAATAATA |
| **2L-127** | GCATAGGAGATGGTTTAATTTGTAAAATAACGGTATTTTGAG |
| **2L-128** | CCGCCAGTTCTGGTTCAACGTAACAACTGAGTTAA |
| **2L-129** | TGGCAACCAGCGCCGTCATAGCCCCCTTCCGGAACGGGGTTTCTCAGGA |
| **2L-130** | GCCGTAAAGCACTAGCGCGGGCAGCTGCATTAATGGCTGCGC |
| **2L-131** | ATGCCACACGGTCATGGGTAAGGGAACA |
| **2L-132** | AGATTTGATCAGTTGAGATTTCATTCAAAGCTCATAGAACCC |
| **2L-133** | AACCCTCAATATCATAACGGGGGCCTTG |
| **2L-134** | GACGATTGTCAGTGGTCACCAACAGCCCTCGGTCG |
| **2L-135** | ATTAAACGAACTGATGTGCTGCGTAATG |
| **2L-136** | CATTGAAATGCAACTTCTACTAATAGTA |
| **2L-137** | CTAAAATAAGCGCAGGAACCTCACCAGA |
| **2L-138** | CGTACTATGGTTGCAACAGGAAGAACCCTTCTGACCCTAAAA |
| **2L-139** | ACCGCCACTGTAGCAACCGATTGAGGGATATGTTATTACAGATAATAGA |
| **2L-140** | ACCAGCATAAAAGGACAGGAACGGTACGGCCGCGCTGAATTT |
| **2L-141** | TGTCGTCCCAATAGGAACCCATAAACAGACACCCTCAATAAT |
| **2L-142** | CGGGCGCTAGGGCGAGTAAAAAATCGTCTGAAATGGCAACAG |
| **2L-143** | TAAATCAAGATTAGTTGCTATTTTGCACCCAGCTACAATTTTATCCTGA |
| **2L-144** | CAAAATCACCAGTTAGATACAAAGTAAGAACCCACCCCCTCAAATATCA |
| **2L-145** | TCACCAGTGAGACGGGCCCACAGTTTCC |
| **2L-146** | TTAATGGAAACAGTACATAAATCAATATATGTGAGTGAATAACCTTGCT |
| **2L-147** | ACGTCAAAGGGCGAACCGCCTGCCTGGGGTGCCTAATTAAGT |
| **2L-148** | AAGGGTGTTTAAATGCGAGTAGACGTTGCATACGA |
| **2L-149** | ACCGGATGCCCTGACGAGAAAGCGTCAT |
| **2L-150** | TAGCTATATCGTAACATCGTACCTCTTCCGCTTTC |
| **2L-151** | ACGTAAAACAGAAATAAAGAAATTGCGTAGATTTTCAGGTTTAACGTCA |
| **2L-152** | ACCACCAGTAATCACATTAAAGGTGAATTACCCAAGGAGAATTTGAGGA |
| **2L-153** | CTGAGAGGACGCTCGAGTCTGTCCATCAAAAGGAGCATAACC |
| **2L-154** | AACGGCGAAGCCCCAAAAACCCAAAAAT |
| **2L-155** | AGTTCAGAAAAGAAACCTTATTGAAAGAATGAGGA |
| **2L-156** | CCTGCTCAAACGAACTAACGGGGCATAGGTTAATAAGGTAAA |
| **2L-157** | ATCTTACCAACGCTAACGAGCGTCTTTCCAGAGCCTAATTTGCCAGTTA |
| **2L-158** | GCTATCTTGTTTAGTTCCCAATTCTGCG |
| **2L-159** | CTTTTTCGGACAGACGCCAGCGGTGTAG |
| **2L-160** | CCAATAGCAAGCAAATCAGATATAGAAGGCTTATCCGGTATTCTAAGAA |
| **2L-161** | ATTCGCCTGATTGCTTTGAATACCAAGTTACAAAATCGCGCAGAGGCGA |
| **2L-162** | CAGTTTCGAACCGCCACCCTCGGCTGAG |
| **2L-163** | AAAAGAAAAATCGGTCATGGTCATAGCTCTCTAGA |
| **2L-164** | GGCCCTGAGAGAGTGACTCCAGCACCAA |
| **2L-165** | CAGTCAAGGAAGATTCTCCGTCGCCAGGGTGTAAA |
| **2L-166** | TTTGACCGCCTGATTGCCTGCTTCCTGT |
| **2L-167** | GCCACCAATTAGCGTTCATATGGTTTACATATAAAAAACGATAGAAGTA |
| **2L-168** | TCCCATCCTAATTTACGAGCATGTAGAAACCAATCAATAATCGGCTGTC |
| **2L-169** | GAAGCAAAACACTAGTTAATACATGTTACGAAAGA |
| **2L-170** | CCTGAGTTGACCCTCTCCAACAGGTCAG |
| **2L-171** | CTCATTCAGTGAATGATACAGGAGTTAAGCCCTTT |
| **2L-172** | CCGGAGAGCCTCAGTTGATAAGAGGTCA |
| **2L-173** | TCTCTGAATTTAACTGCGGAATGGAAGTGAGCTGAAAAGGTG |
| **2L-174** | CAGTTGGGTCAGAGTAACAGTGTTGAGG |
| **2L-175** | TCCGGCAAAGAATTGAGTGTAATAAATC |

**Table S3.** Other DNA sequences used in this work.

| **Name** | **Sequences (from 5′ to 3′)** | **Remarks** |
| --- | --- | --- |
| **LogA-1.1** | TTAGAATCGTAAGAATATTGCTACCTTGCATGGA | Common DNA |
| **LogA-1.2** | TTGCGAAGGTGTATCACCGTATGCTCAGAAATAAGAGAAACGTTGCTACCTTGCATGGA | Common DNA |
| **LogB-2.1** | TAACCACCACACCCCCAGAATCACACGACCATTTTTTTCGTTCCACTTCGTTA | Common DNA |
| **LogB-2.2** | ATTTTGCCCACCCTCAGAGCCTGAAACAACATAAATCCTTATTTTTTTTCGTTCCACTTCGTTA | Common DNA |
| **LogA-3.1** | AAGGGAAGAAAGCGCGCAAATAATACCTACATTGCTACCTTGCATGGA | Common DNA |
| **LogA-3.2** | TAGCGTATAACACTGAGTTTCCCTTGAGGGTAATTCAGAAGGTTGCTACCTTGCATGGA | Common DNA |
| **LogB-4.1** | GCAAGAAACAATGATATCGGCCATTCAGAATCGGCCTTGCTGGTATTTTTTTCGTTCCACTTCGTTA | Common DNA |
| **LogB-4.2** | AGCGCAGCAGTTGACTATATTTTCATTTCTGAAATAGCAATATTTTTTTCGTTCCACTTCGTTA | Common DNA |
| **LogA-5.1** | TACGTGAACCATCATTTCTTTTTGCGCTCACTTTGCTACCTTGCATGGA | Common DNA |
| **LogA-5.2** | TGAACGGAATCATTGTGAATTGTTTTGCATGTCAAAATGCCGTTGCTACCTTGCATGGA | Common DNA |
| **LogB-6.1** | TATTAAAGAACGTGTGCAGCAGCCGGAAGCATTTTTTTCGTTCCACTTCGTTA | Common DNA |
| **LogB-6.2** | GGAACGAGAAGAAAAATCTACTCATAACGCAAATAAGAAAGGTTTTTTTCGTTCCACTTCGTTA | Common DNA |
| **A’** | TTTTTTTTAGACAGCAAGGTAGC | 5'-thiolated DNA |
| **B'** | TTTTTTTTAAGTGGAACGAGTCT | 5'-thiolated DNA |
| **A*** | TCCATGCAAGGTAGCA | Common DNA |
| **bst** | TAACGAAGTGGA | Common DNA |
| **bAu** | AGACTCGTTCCA | Common DNA |
| **B*** | TAACGAAGTGGAACGAAAA | Common DNA |

**Table S4.** Thermal annealing ramp for TL [1].

| **Temperature [°C]** | **Duration [min]** |
| --- | --- |
| 85 | 5 |
| 65-61 | 5 |
| 60-51 | 60 |
| 50-38 | 20 |
| 37-25 | 10 |
| 25 | forever |

**Table S5.** Fitting parameters for the statistical histograms of various OUTPUT structures.

|  | **INPUT** | **Model** | **Fitting parameters** | | |
| --- | --- | --- | --- | --- | --- |
| **a** | **b** | **c** |
| **YES-A** | **0** | f(x) = a*exp(-((x-b)/c)^2) | 177.7 | 2.95 | 0.766 |
| **1** | f(x) = a*exp(b*x) | 244 | -3.146 | \ |
| **YES-B** | **0** | f(x) = a*exp(-((x-b)/c)^2) | 159.3 | 2.939 | 0.6598 |
| **1** | f(x) = a*exp(b*x) | 176 | -2.746 | \ |
| **AND** | **00** | f(x) = a*exp(-((x-b)/c)^2) | 89.21 | 4.944 | 1.898 |
| **01** | f(x) = a*exp(-((x-b)/c)^2) | 132 | 2.94 | 0.6847 |
| **10** | f(x) = a*exp(-((x-b)/c)^2) | 81.49 | 2.902 | 0.7207 |
| **11** | f(x) = a*exp(b*x) | 214 | -3.556 | \ |
| **OR** | **00** | f(x) = a*exp(-((x-b)/c)^2) | 124 | 3 | 0.6883 |
| **01** | f(x) = a*exp(b*x) | 144 | -4.927 | \ |
| **10** | f(x) = a*exp(b*x) | 147 | -3.851 | \ |
| **11** | f(x) = a*exp(b*x) | 133 | -3.489 | \ |

**References**

1. Zhou, C.; Duan, X.; Liu, N., A plasmonic nanorod that walks on DNA origami*. Nat Commu***n 201**5, 6, 8102.
